# Supplementary material for: Low-tortuosity Ion Transport Channels of Anion-exchange Membranes for Water electrolysis and Fuel cells
Source: Research Square preprint supplement (doi:10.21203/rs.3.rs-8267609/v1), 2025-12-26
Supplement: Supplementary file 1 [file e5041f3669b855937f90e705.docx]

**Low-tortuosity Ion Transport Channels of Anion-exchange Membranes for Water electrolysis and Fuel cells**

Siwen Lu, Jie Liu, Yiran Li, Shiqi Peng, Xiaojun Sun, Ziliang Li, Li Gao, Xuehua Ruan, Xiaobin Jiang, Xiaopeng Zhang, Xiaoming Yan*, and Gaohong He*

State Key Laboratory of Fine Chemicals, R&D Center of Membrane Science and Technology, School of Chemical Engineering, Ocean and Life, Dalian University of Technology, Panjin, Liaoning,China, 124221

E-mail: yanxiaoming@dlut.edu.cn (Dr. Xiaoming Yan); hgaohong@dlut.edu.cn (Dr. Gaohong He)

**1.** **Supplementary figures**

**
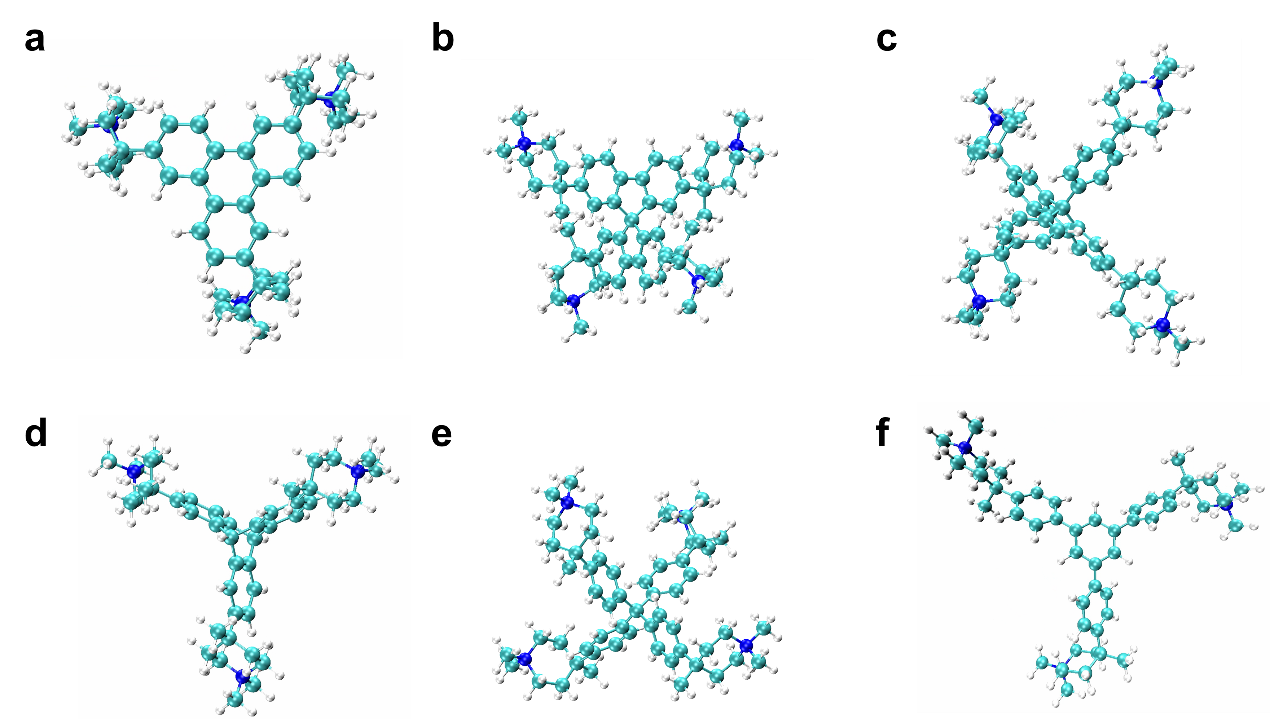
**

**Supplementary Fig. 1** Structure of branched clusters. **a** QATYP. **b** QASFP. **c** QADFP. **d** QATCP. **e** QATMP. **f** QATBP.


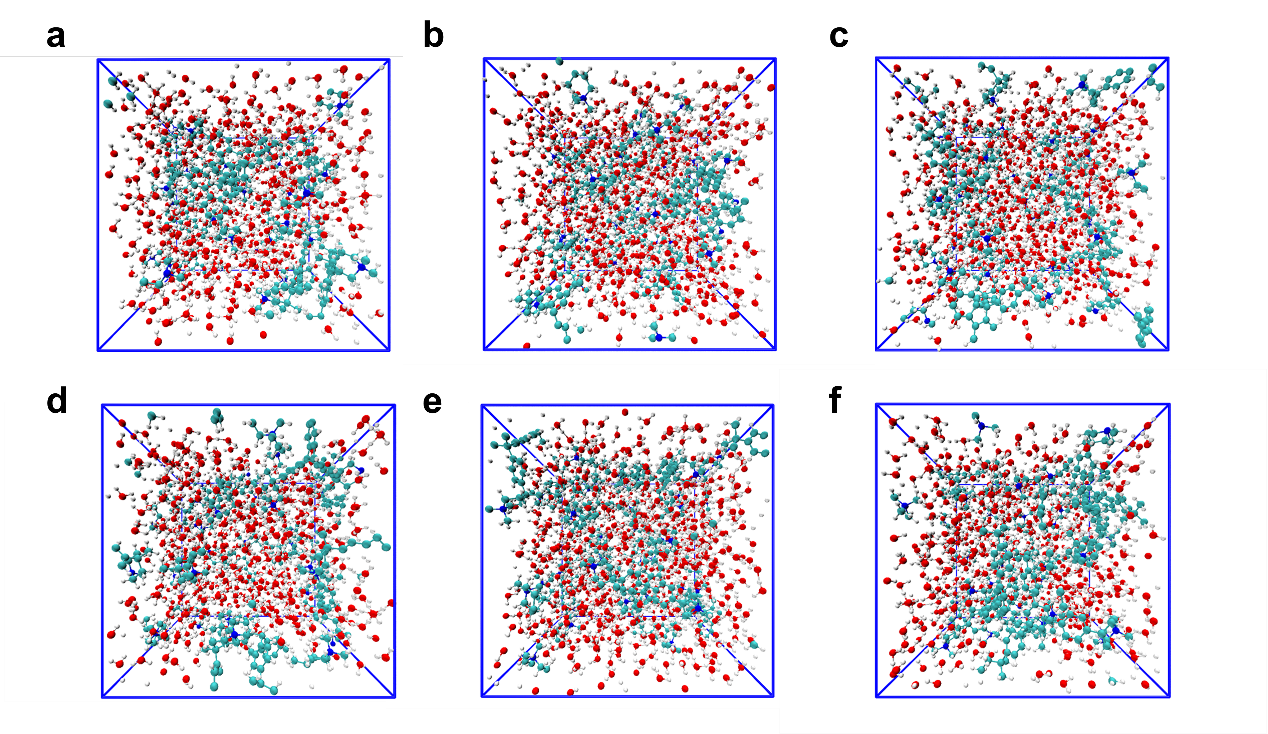


**Supplementary Fig. 2** Boxes of branched clusters and water molecules. **a** QATYP. **b** QASFP. **c** QADFP. **d** QATCP. **e** QATMP. **f** QATBP.
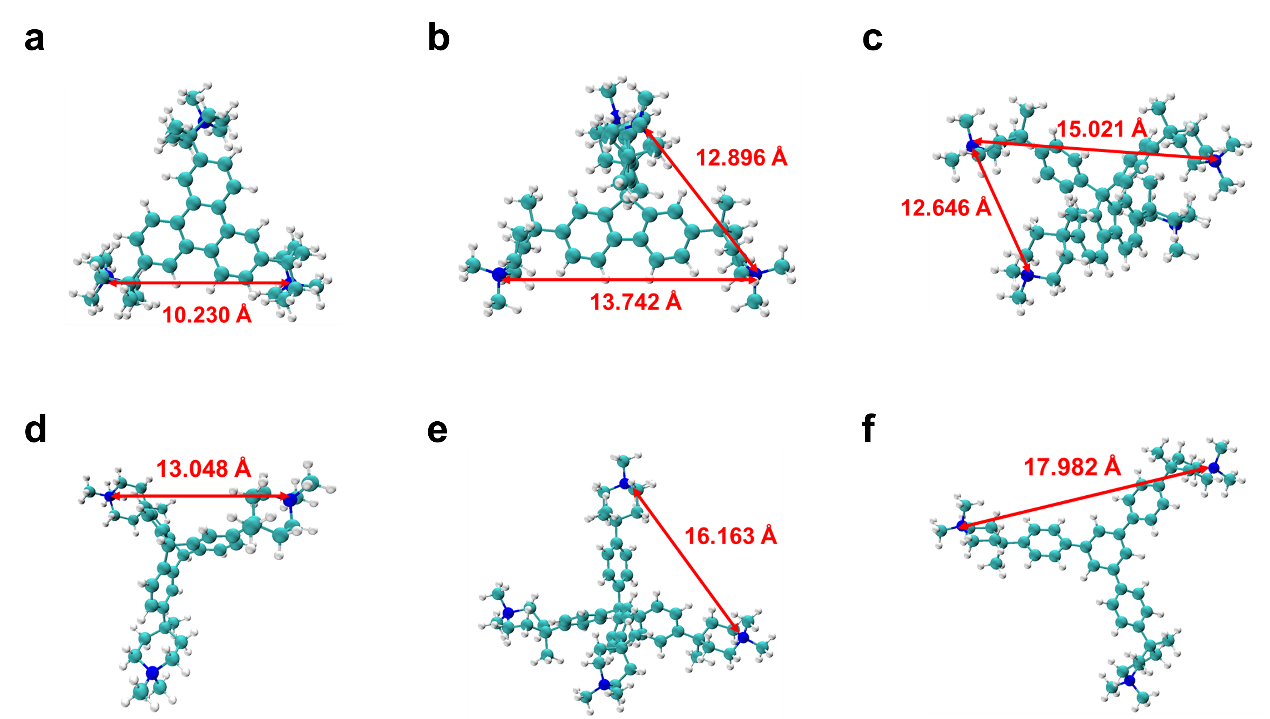


**Supplementary Fig. 3** Inter-group distances in branched micro-clusters. **a** QATYP. **b** QASFP. **c** QADFP. **d** QATCP. **e** QATMP. **f** QATBP.


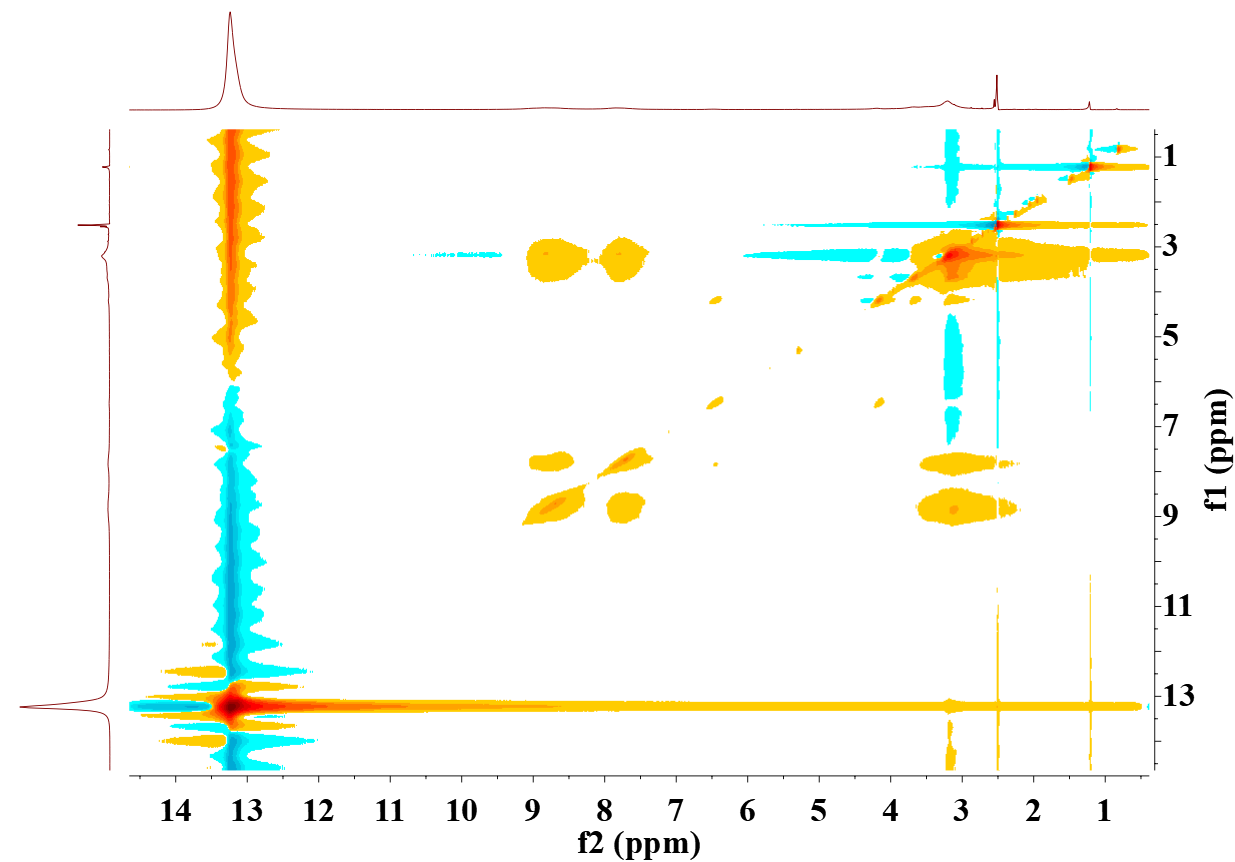


**Supplementary Fig. 4** 1H-NMR NOESY spectrum of QATYP.


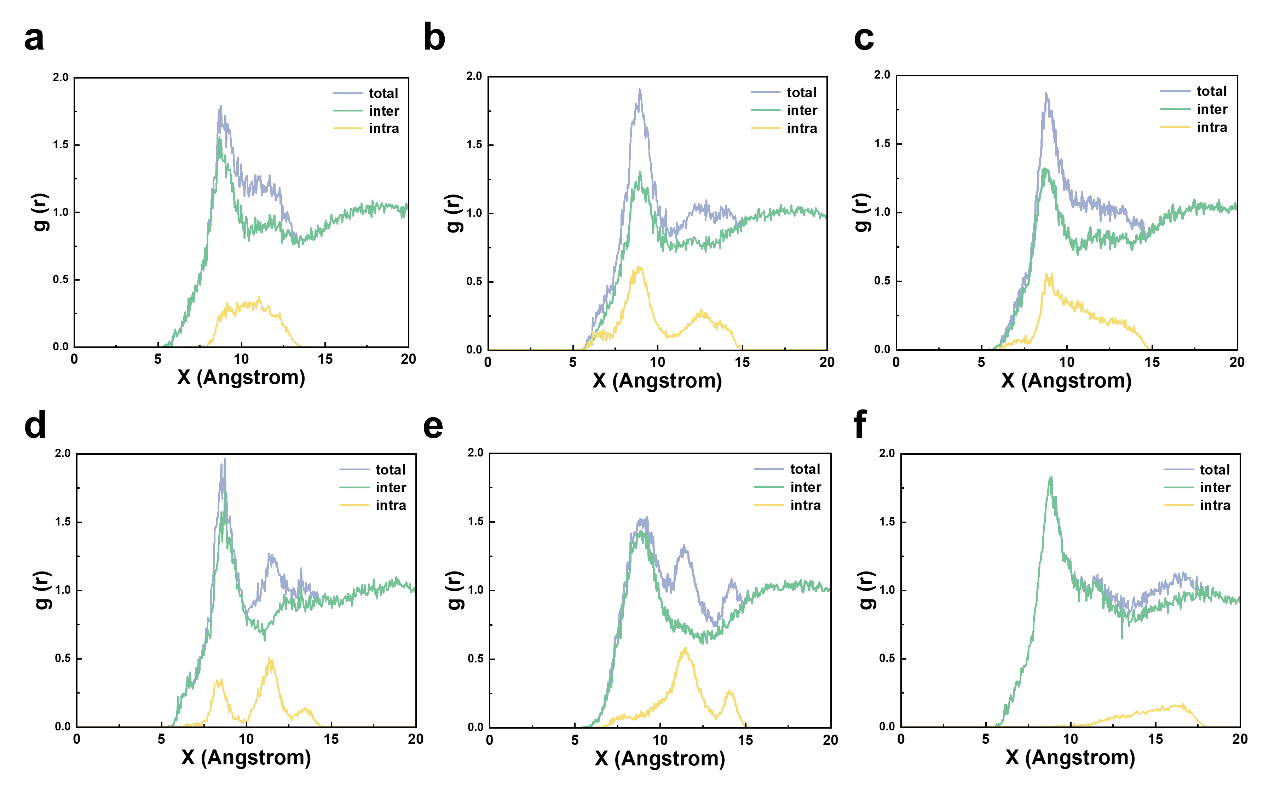


**Supplementary Fig. 5** RDFN-N of branched micro-clusters. **a** QATYP. **b** QASFP. **c** QADFP. **d** QATCP. **e** QATMP. **f** QATBP.


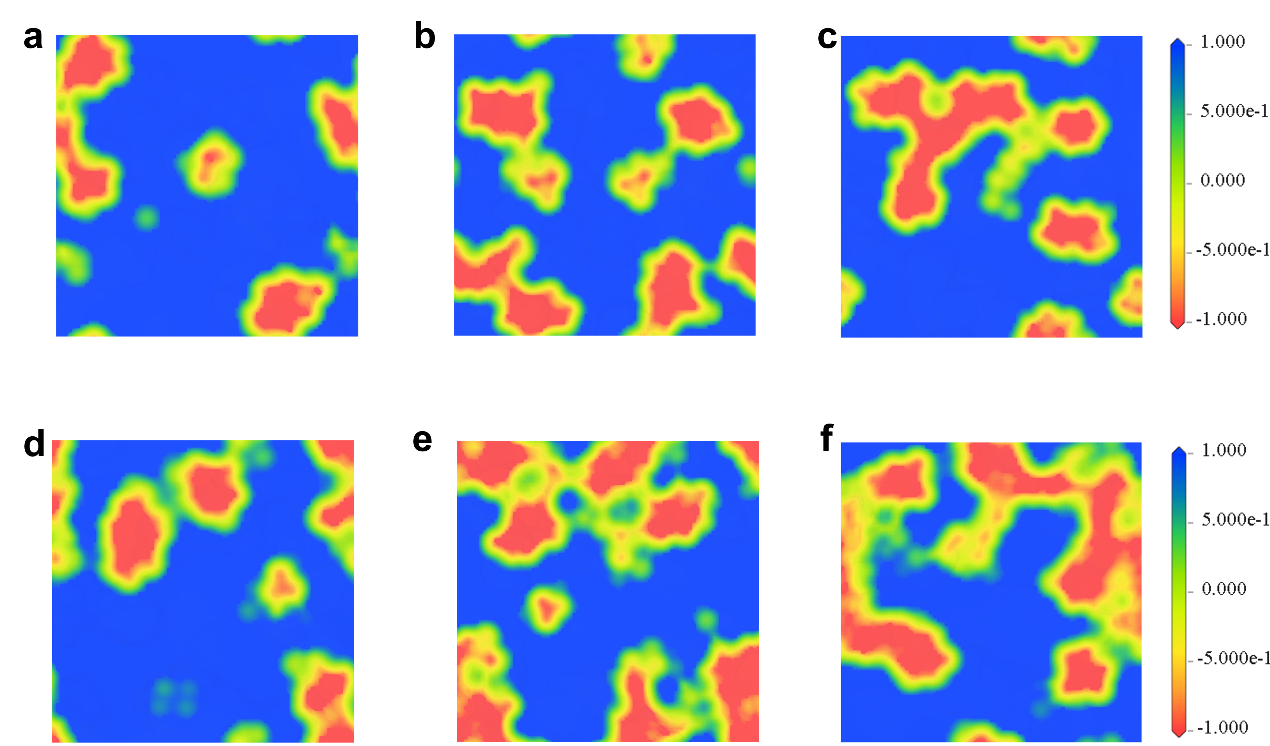


**Supplementary Fig. 6** Structural density analysis of branched clusters. **a** QATYP. **b** QASFP. **c** QADFP. **d** QATCP. **e** QATMP. **f** QATBP.


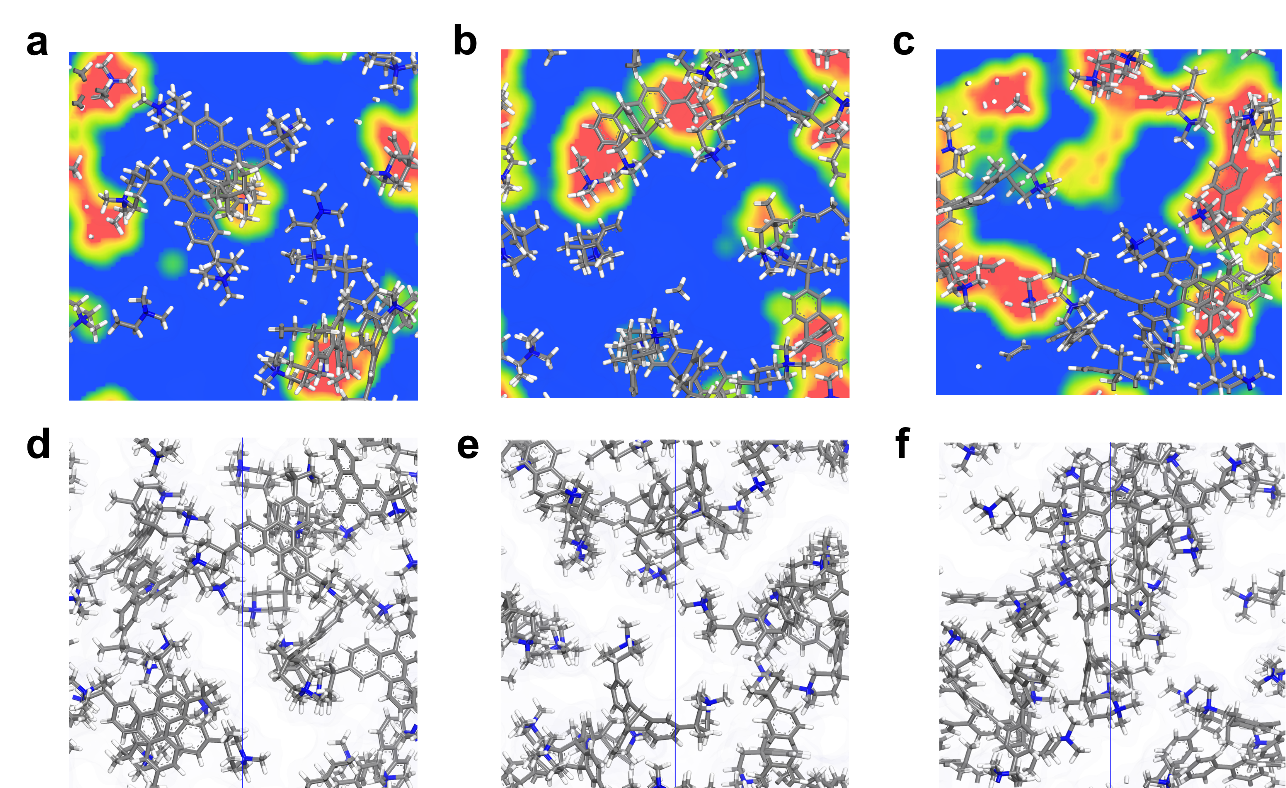


**Supplementary Fig. 7** Cross-sectional view of branched clusters (number of branching sites = 3). **a, d** QATYP. **b, e** QATCP. **c, f** QATBP.


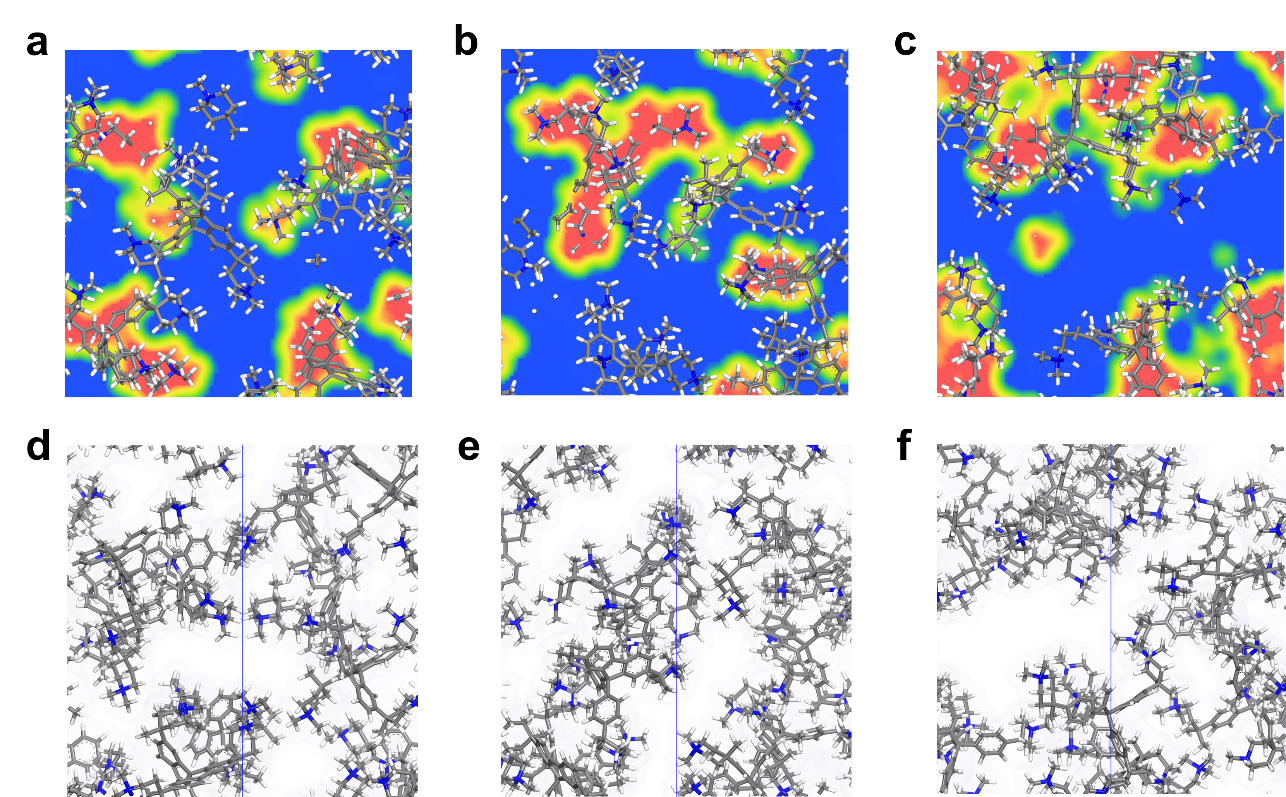


**Supplementary Fig. 8** Cross-sectional view of branched clusters (number of branching sites = 4). **a, d** QASFP. **b, e** QADFP. **c, f** QATMP.


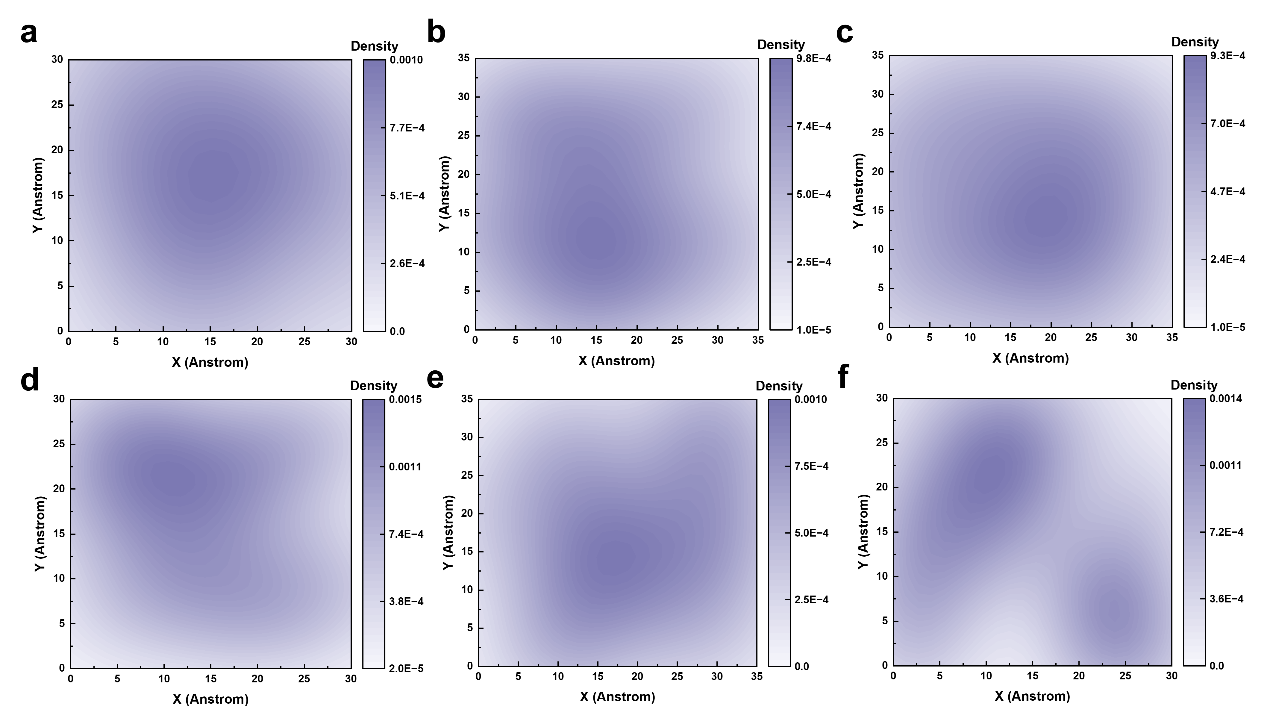


**Supplementary Fig. 9** OH- 2D concentration distribution of branched clusters. **a** QATYP. **b** QASFP. **c** QADFP. **d** QATCP. **e** QATMP. **f** QATBP.


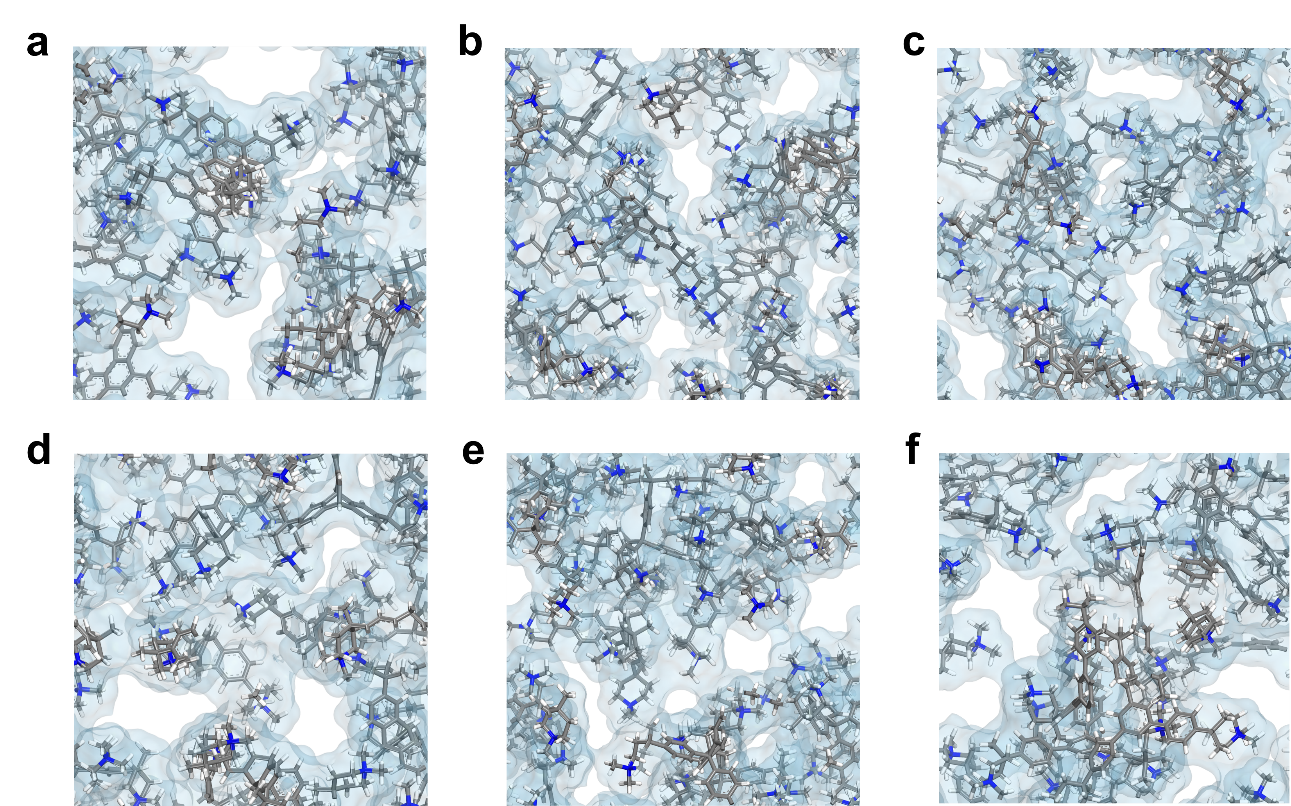


**Supplementary Fig. 10** Ion transport channel morphology of branched clusters. **a** QATYP. **b** QASFP. **c** QADFP. **d** QATCP. **e** QATMP. **f** QATBP.


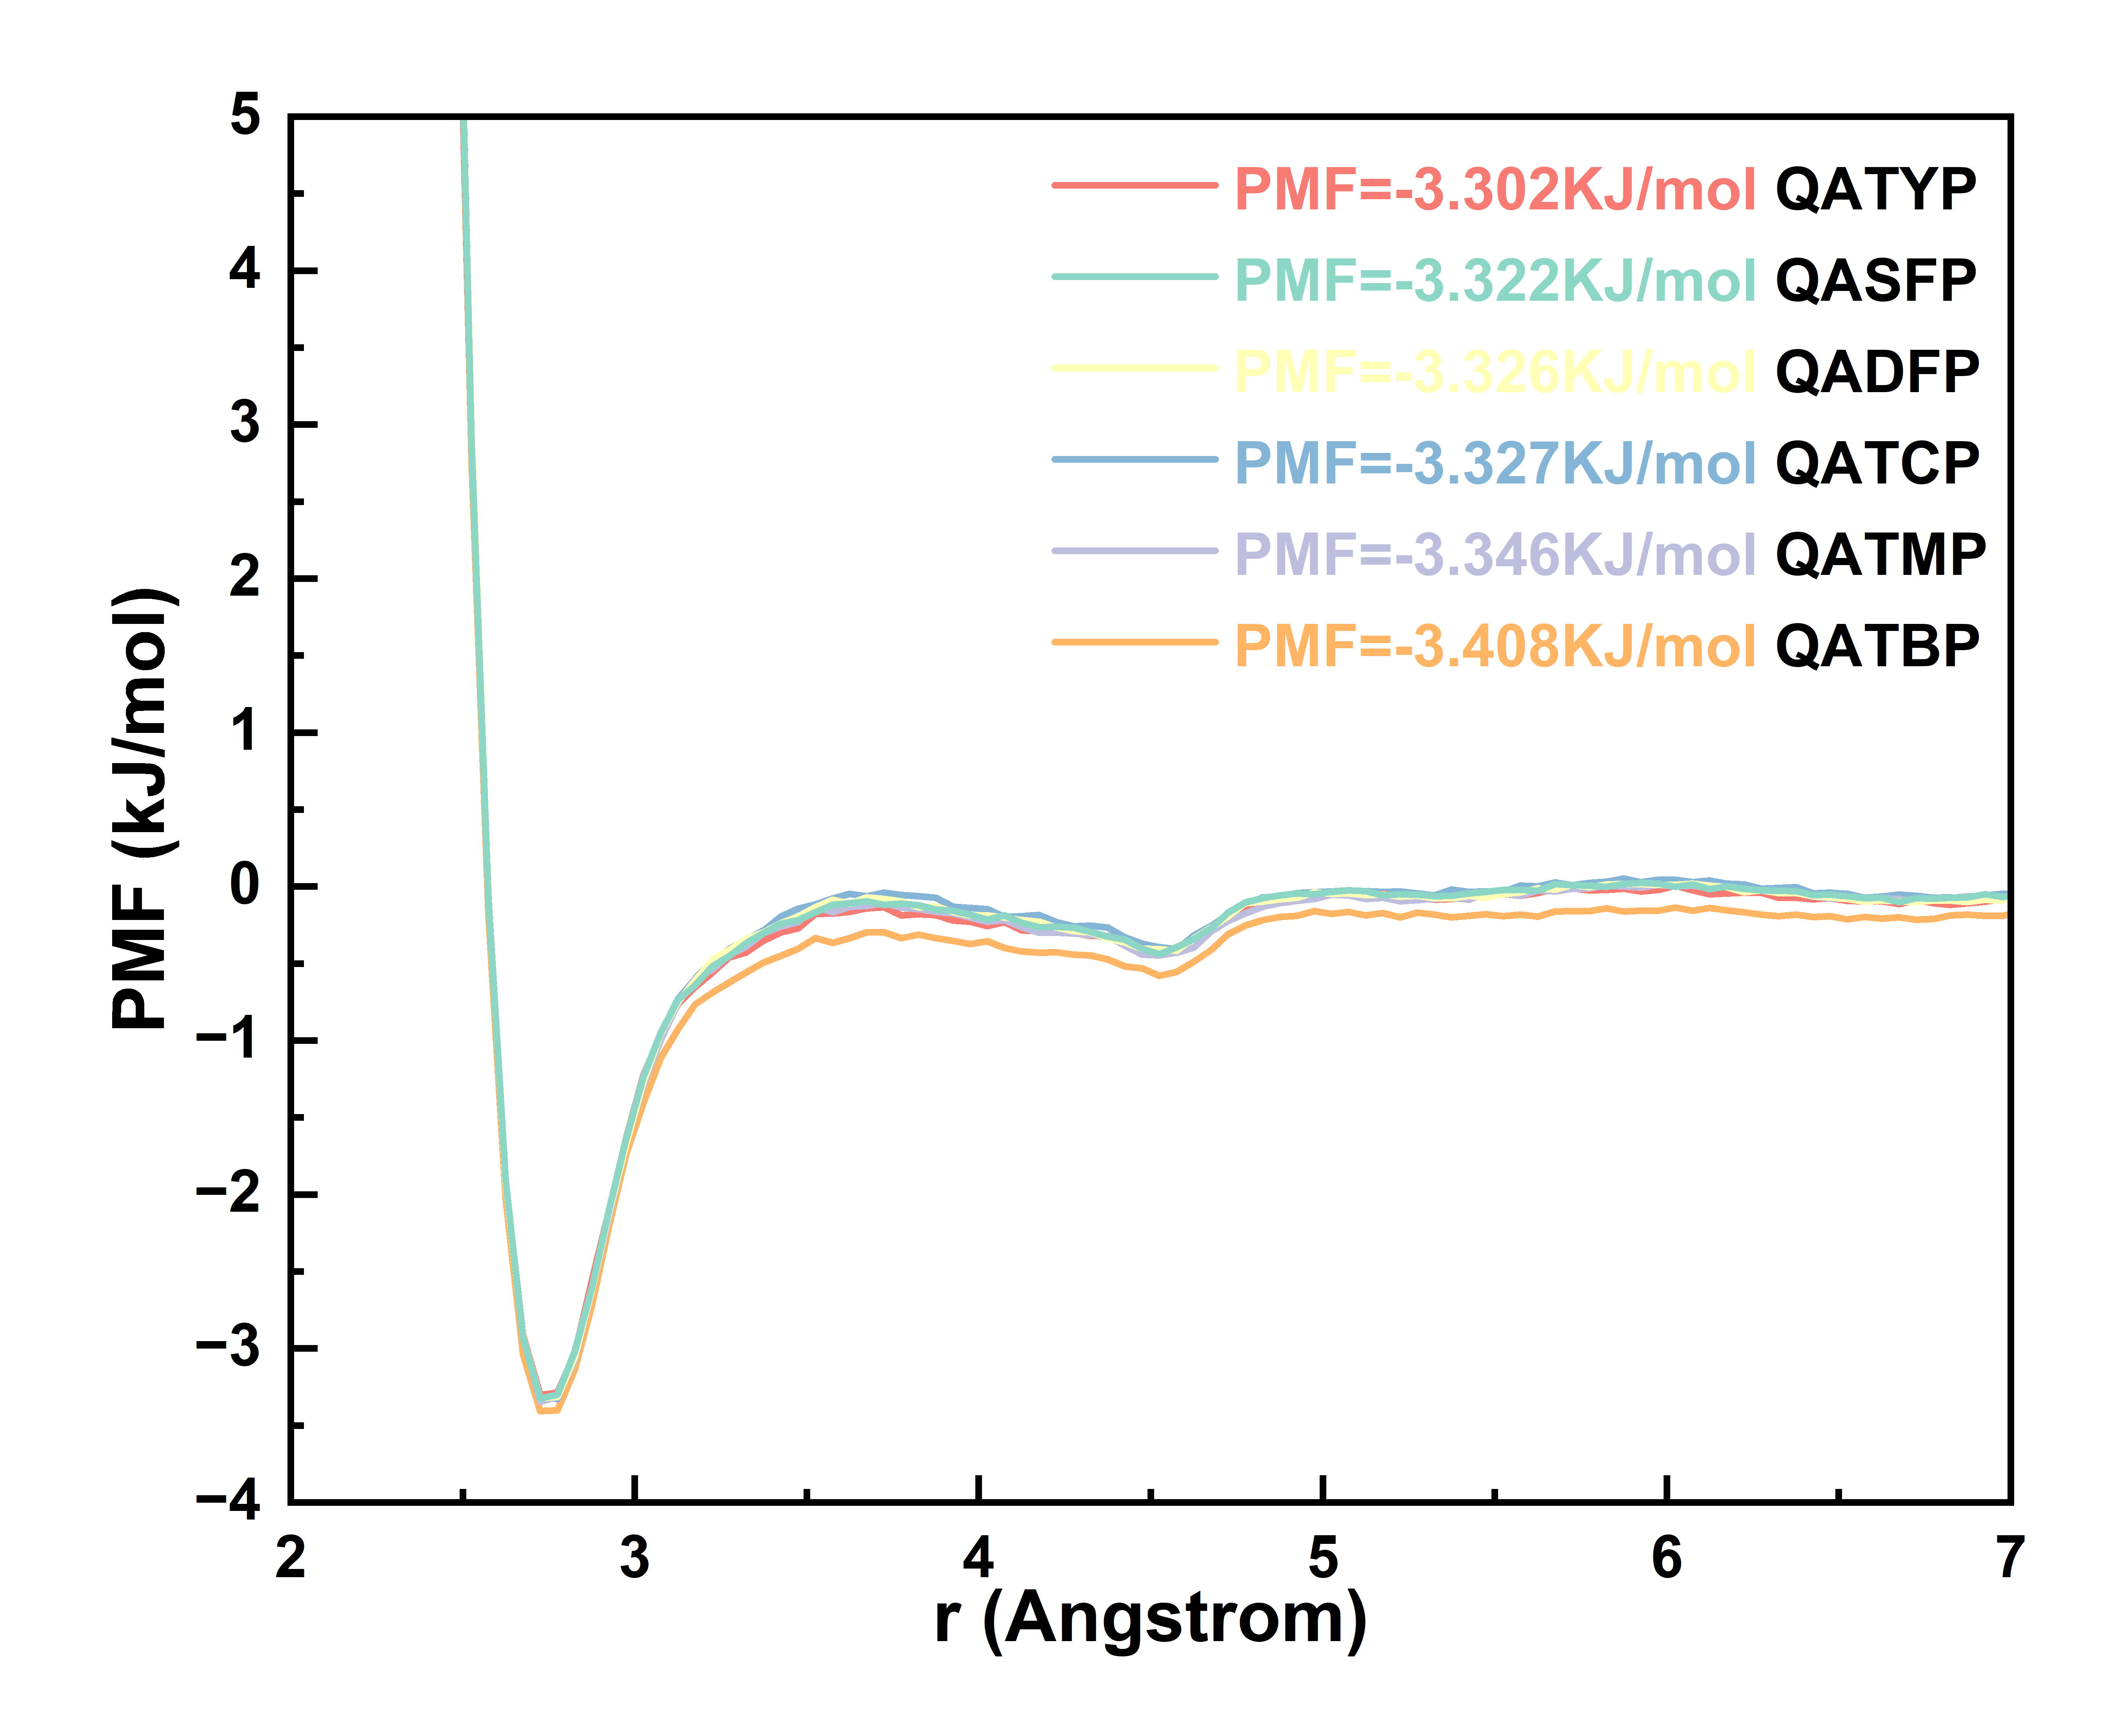


**Supplementary Fig. 11** PMF of different branched clusters.


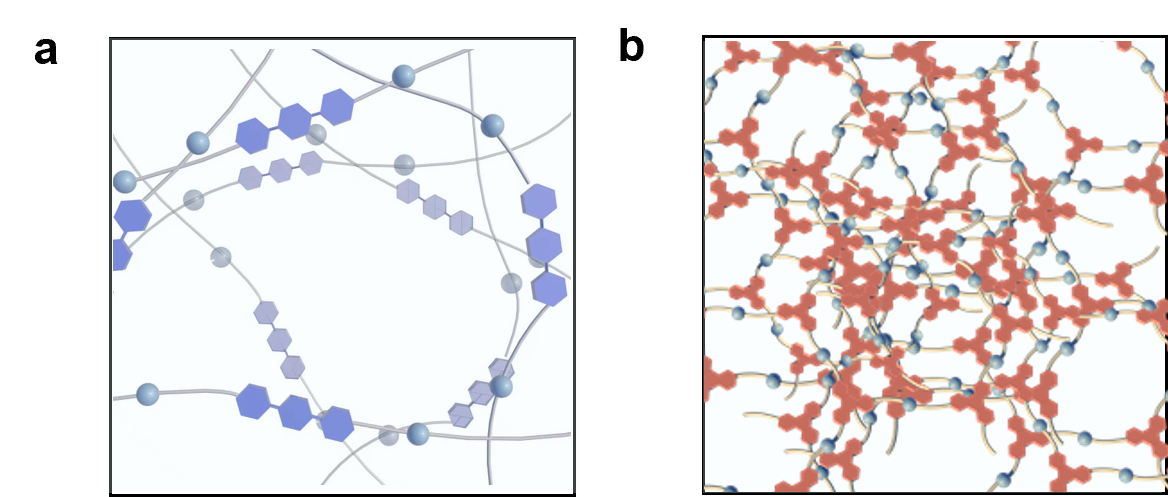


**Supplementary Fig. 12** Schematic graph of QAPPT and QATYP. **a** QAPPT. **b** QATYP.


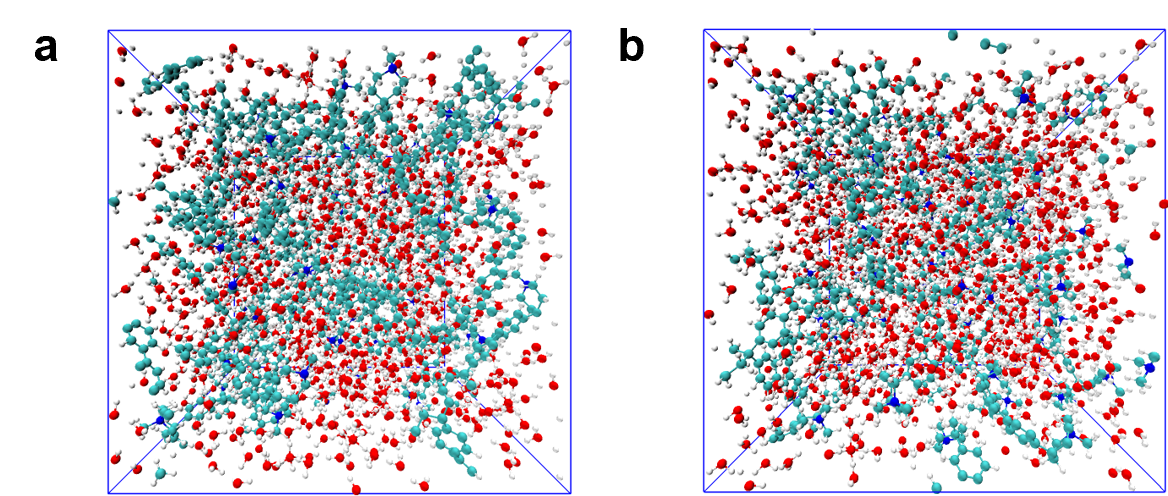


**Supplementary Fig. 13** Boxes of QAPPT and QATYP and water molecules. **a** QAPPT. **b** QATYP.


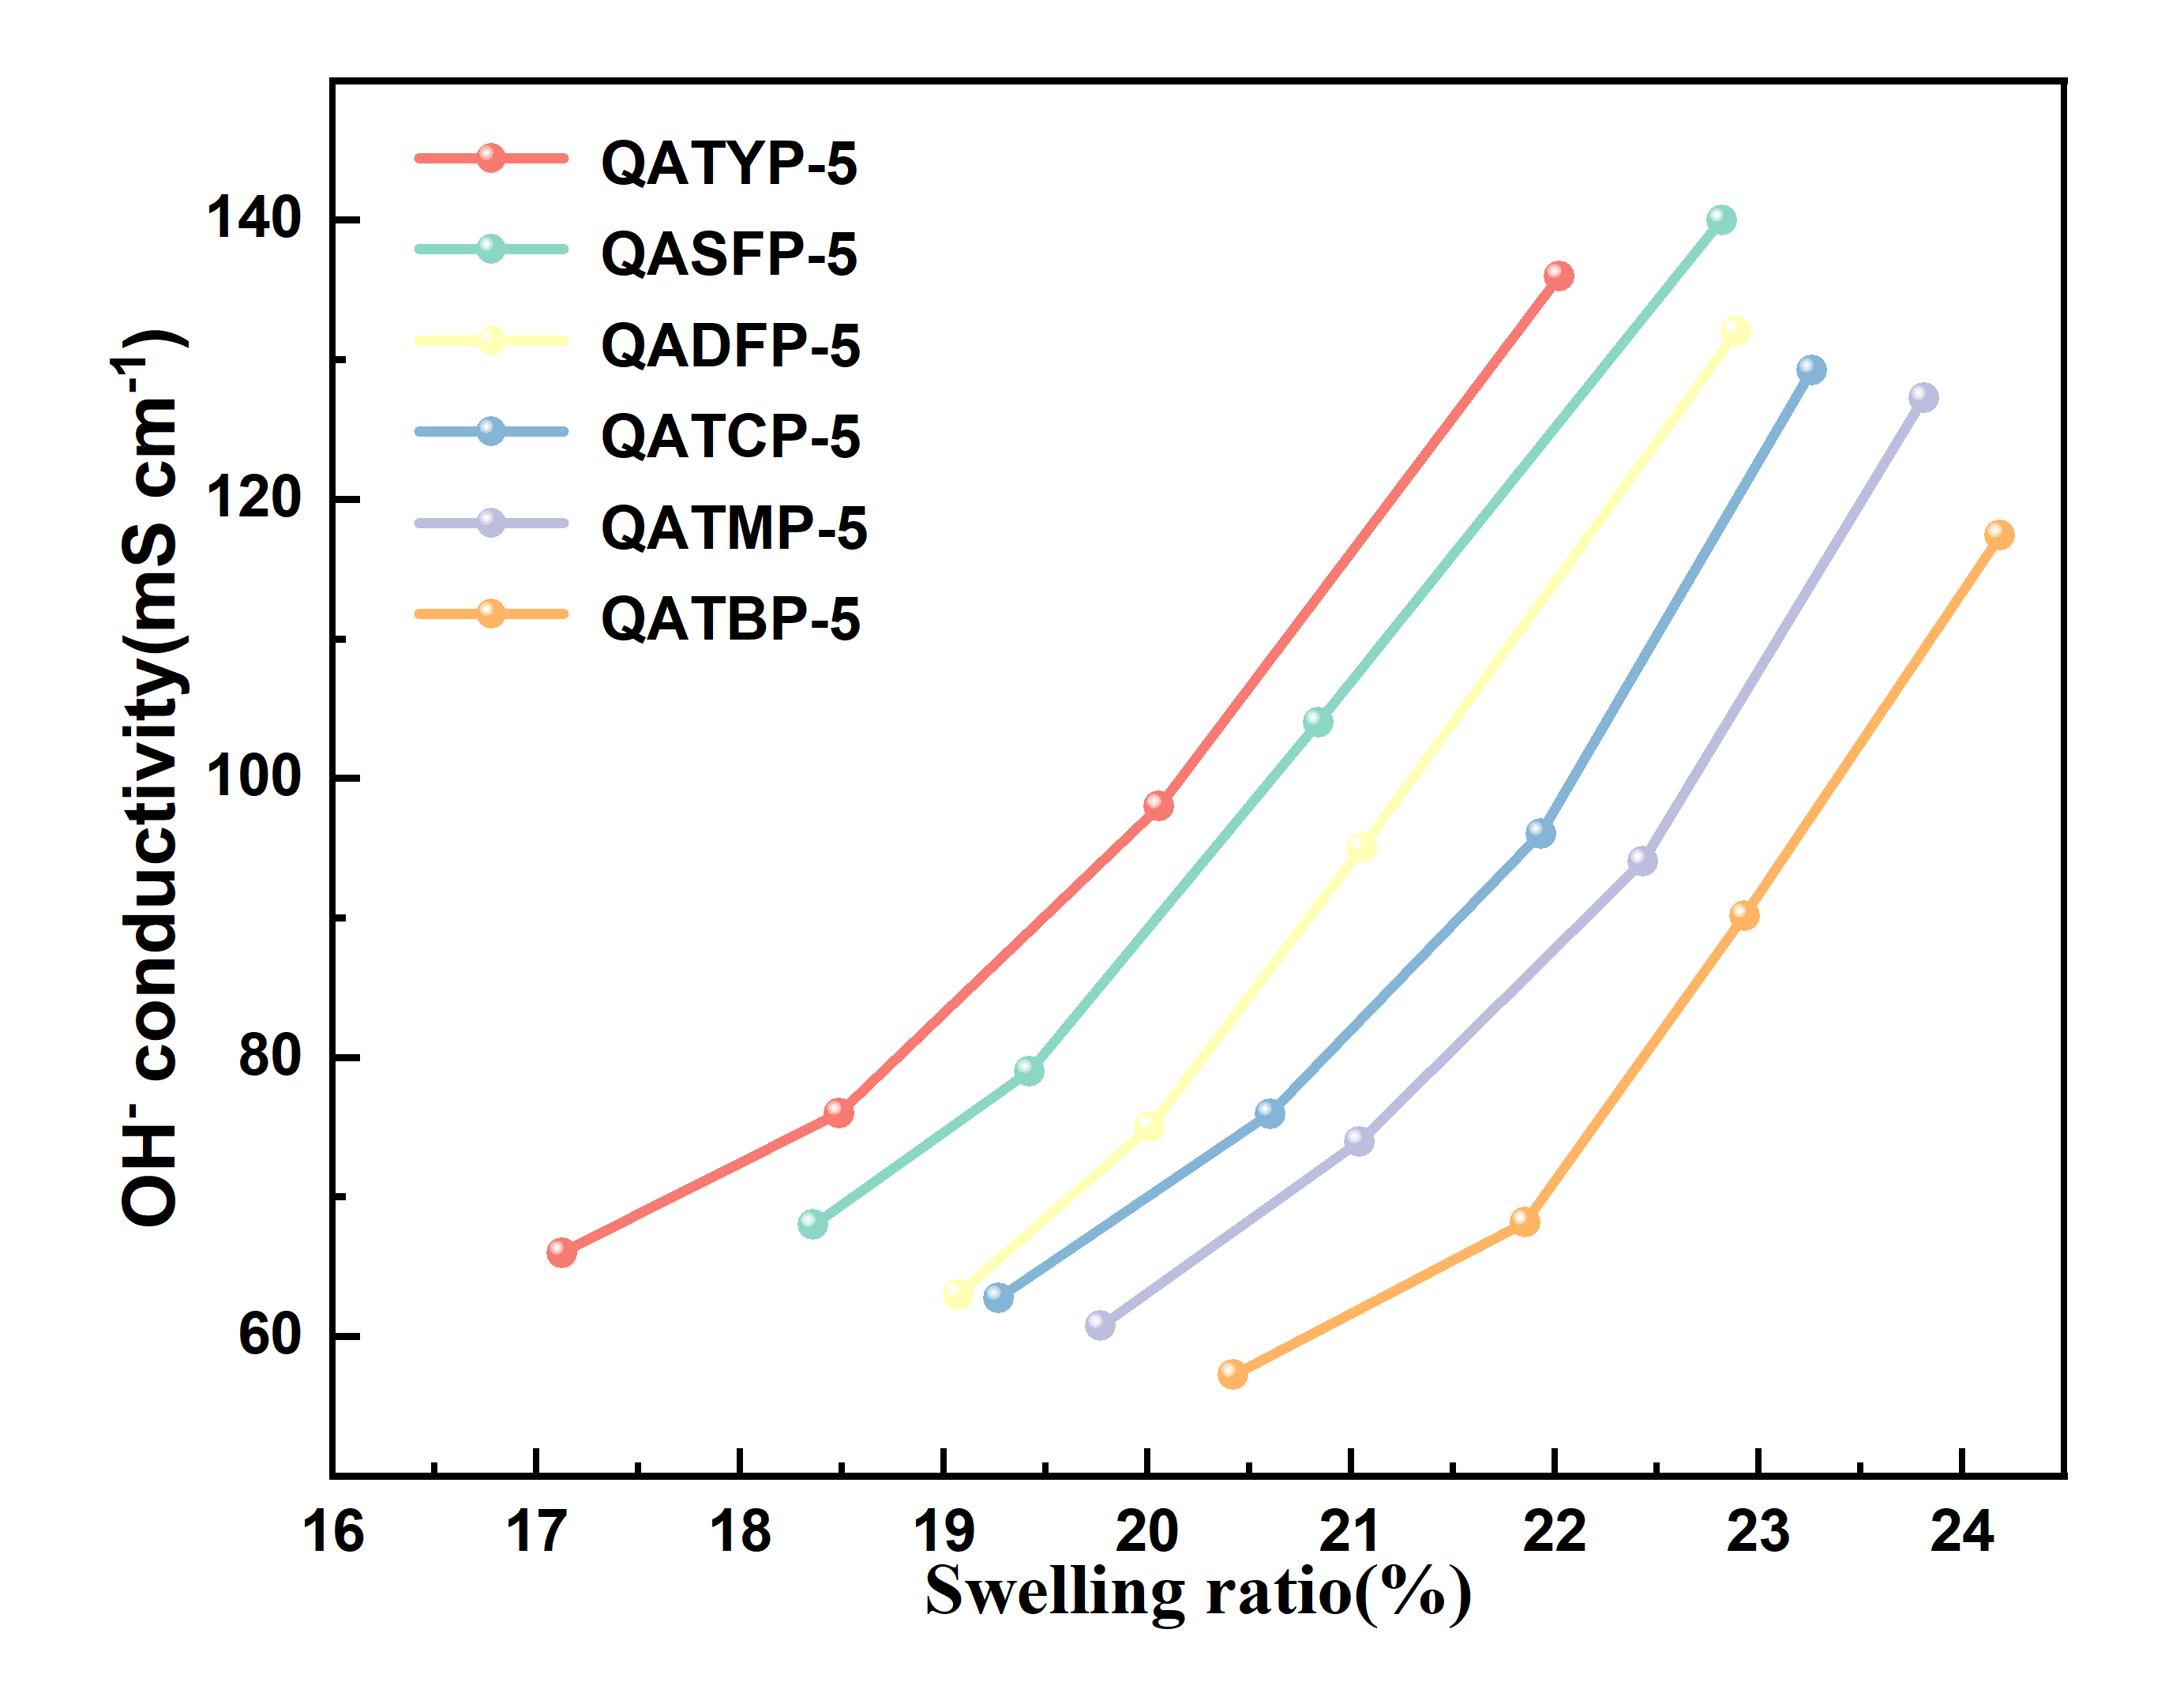


**Supplementary Fig. 14** SR-dependent conductivity of different membranes.


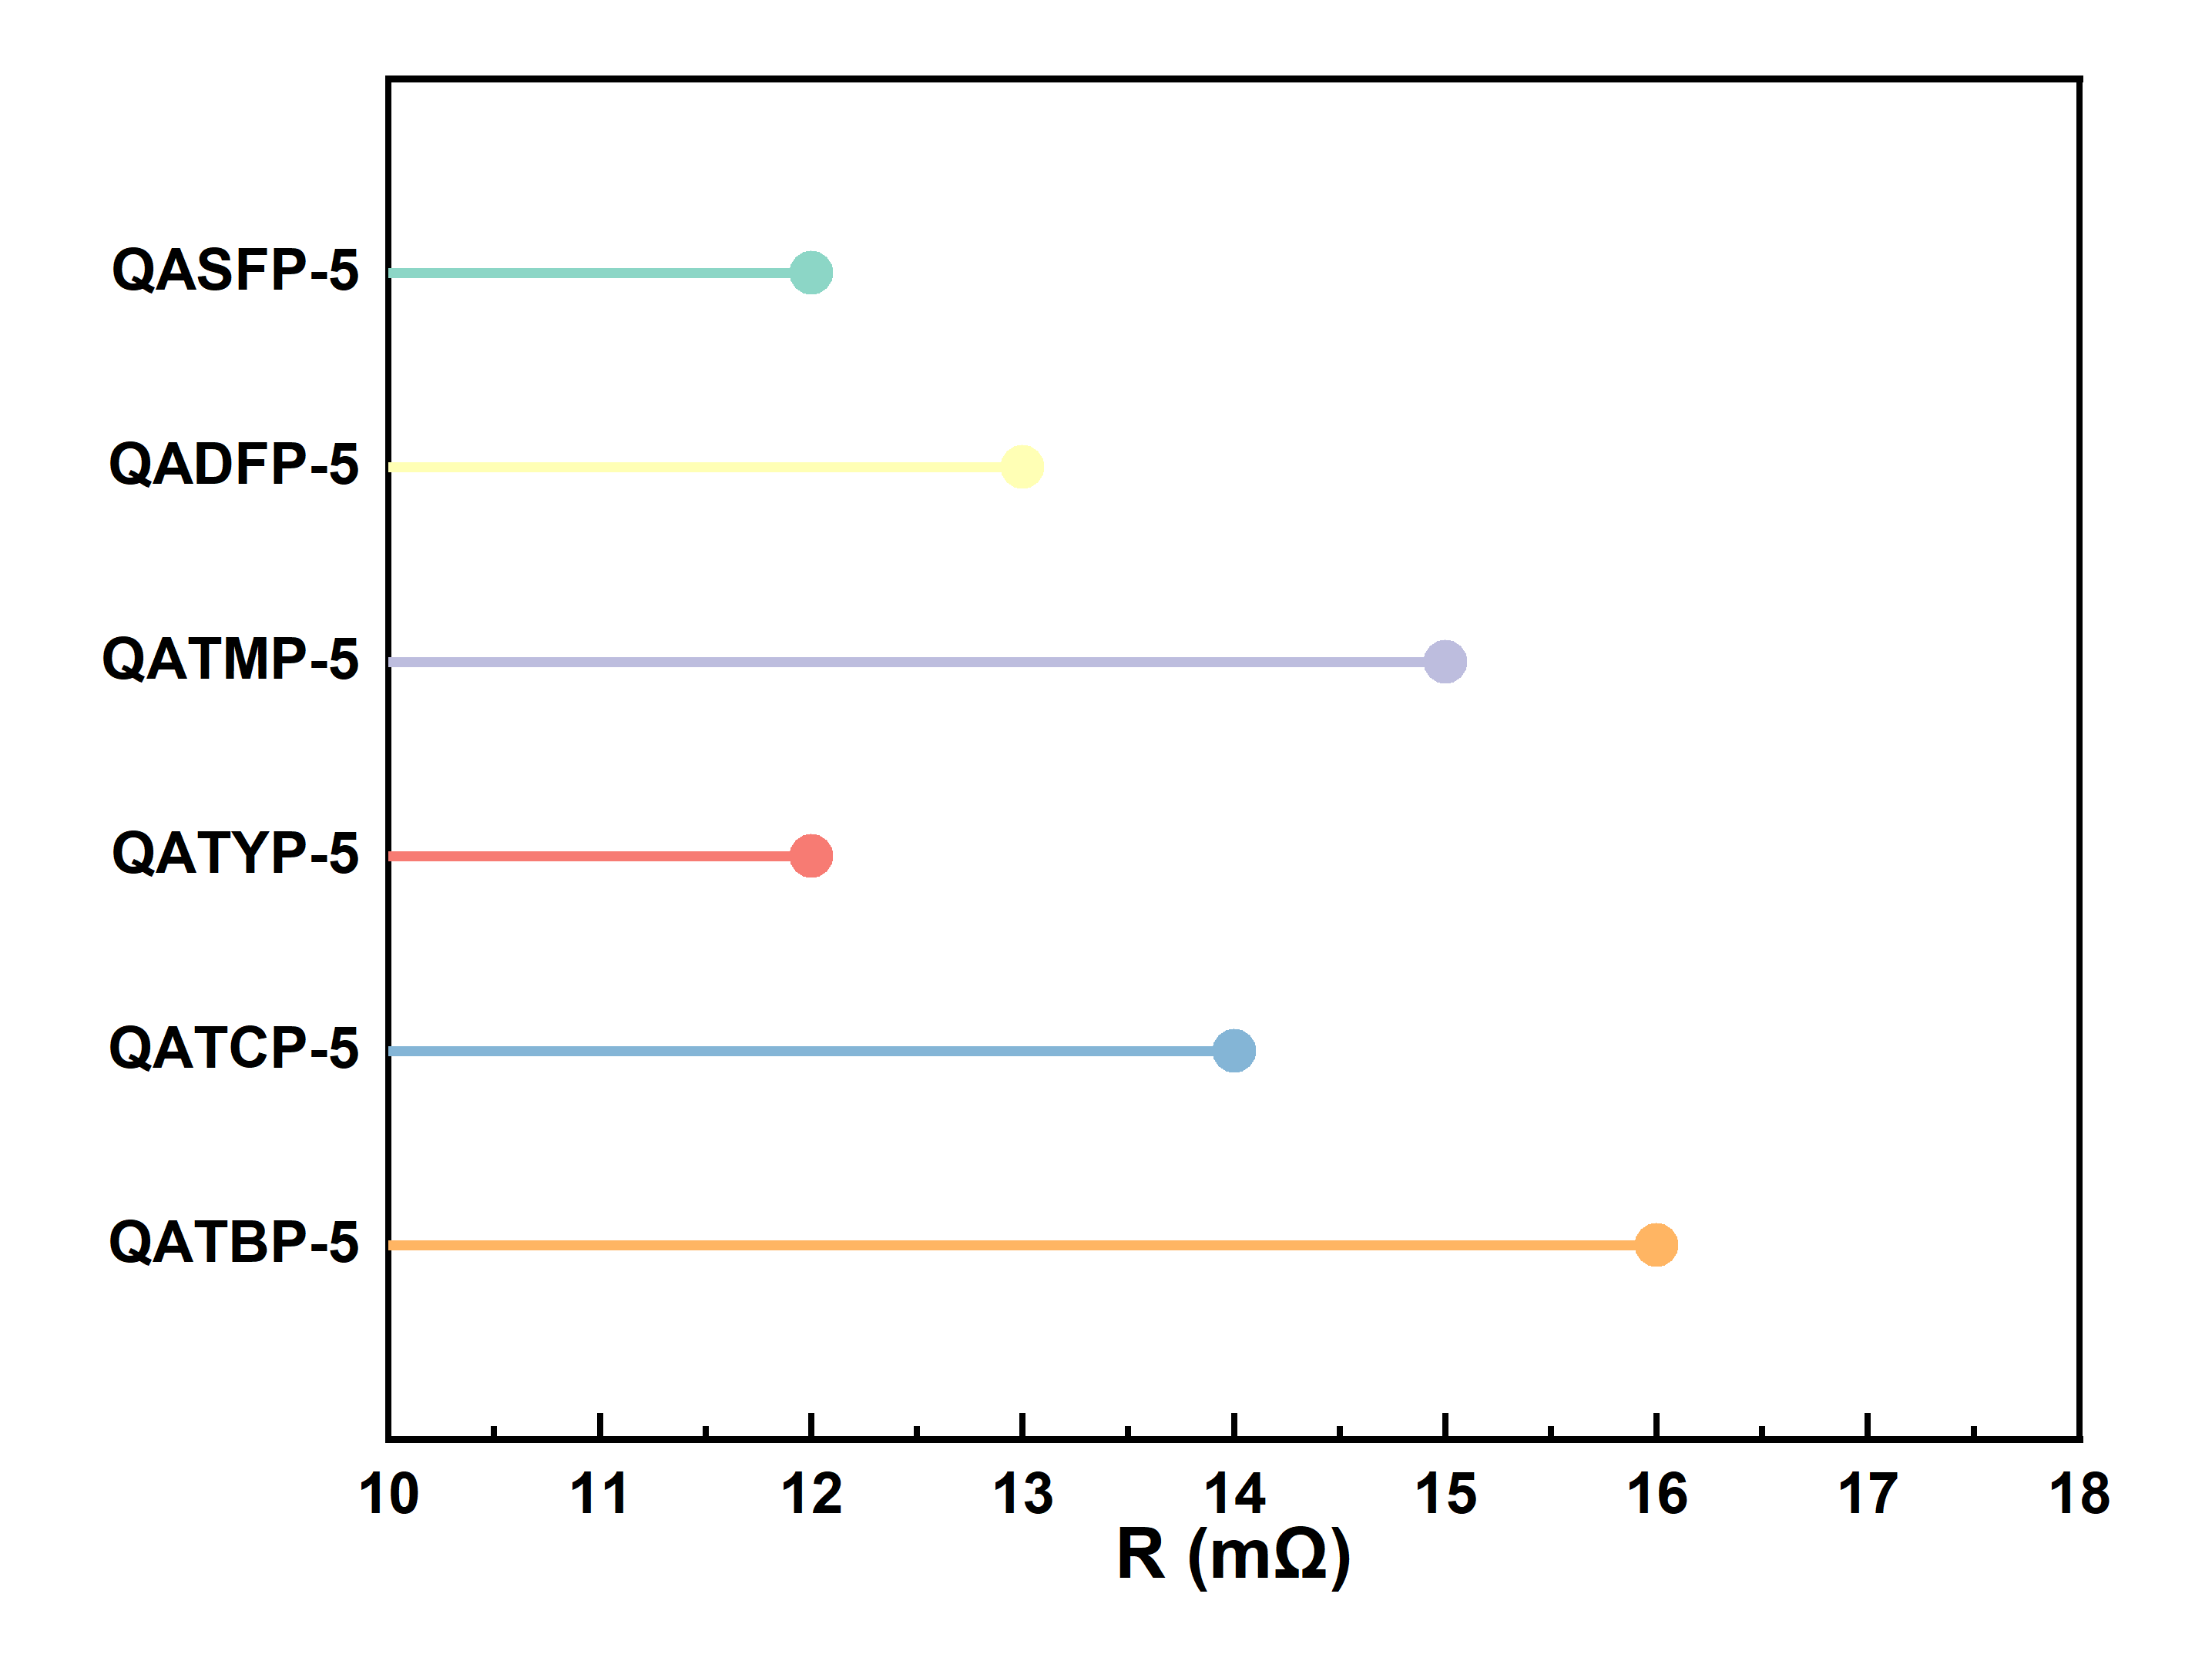
 **Supplementary Fig. 15** Resistance of different membranes.


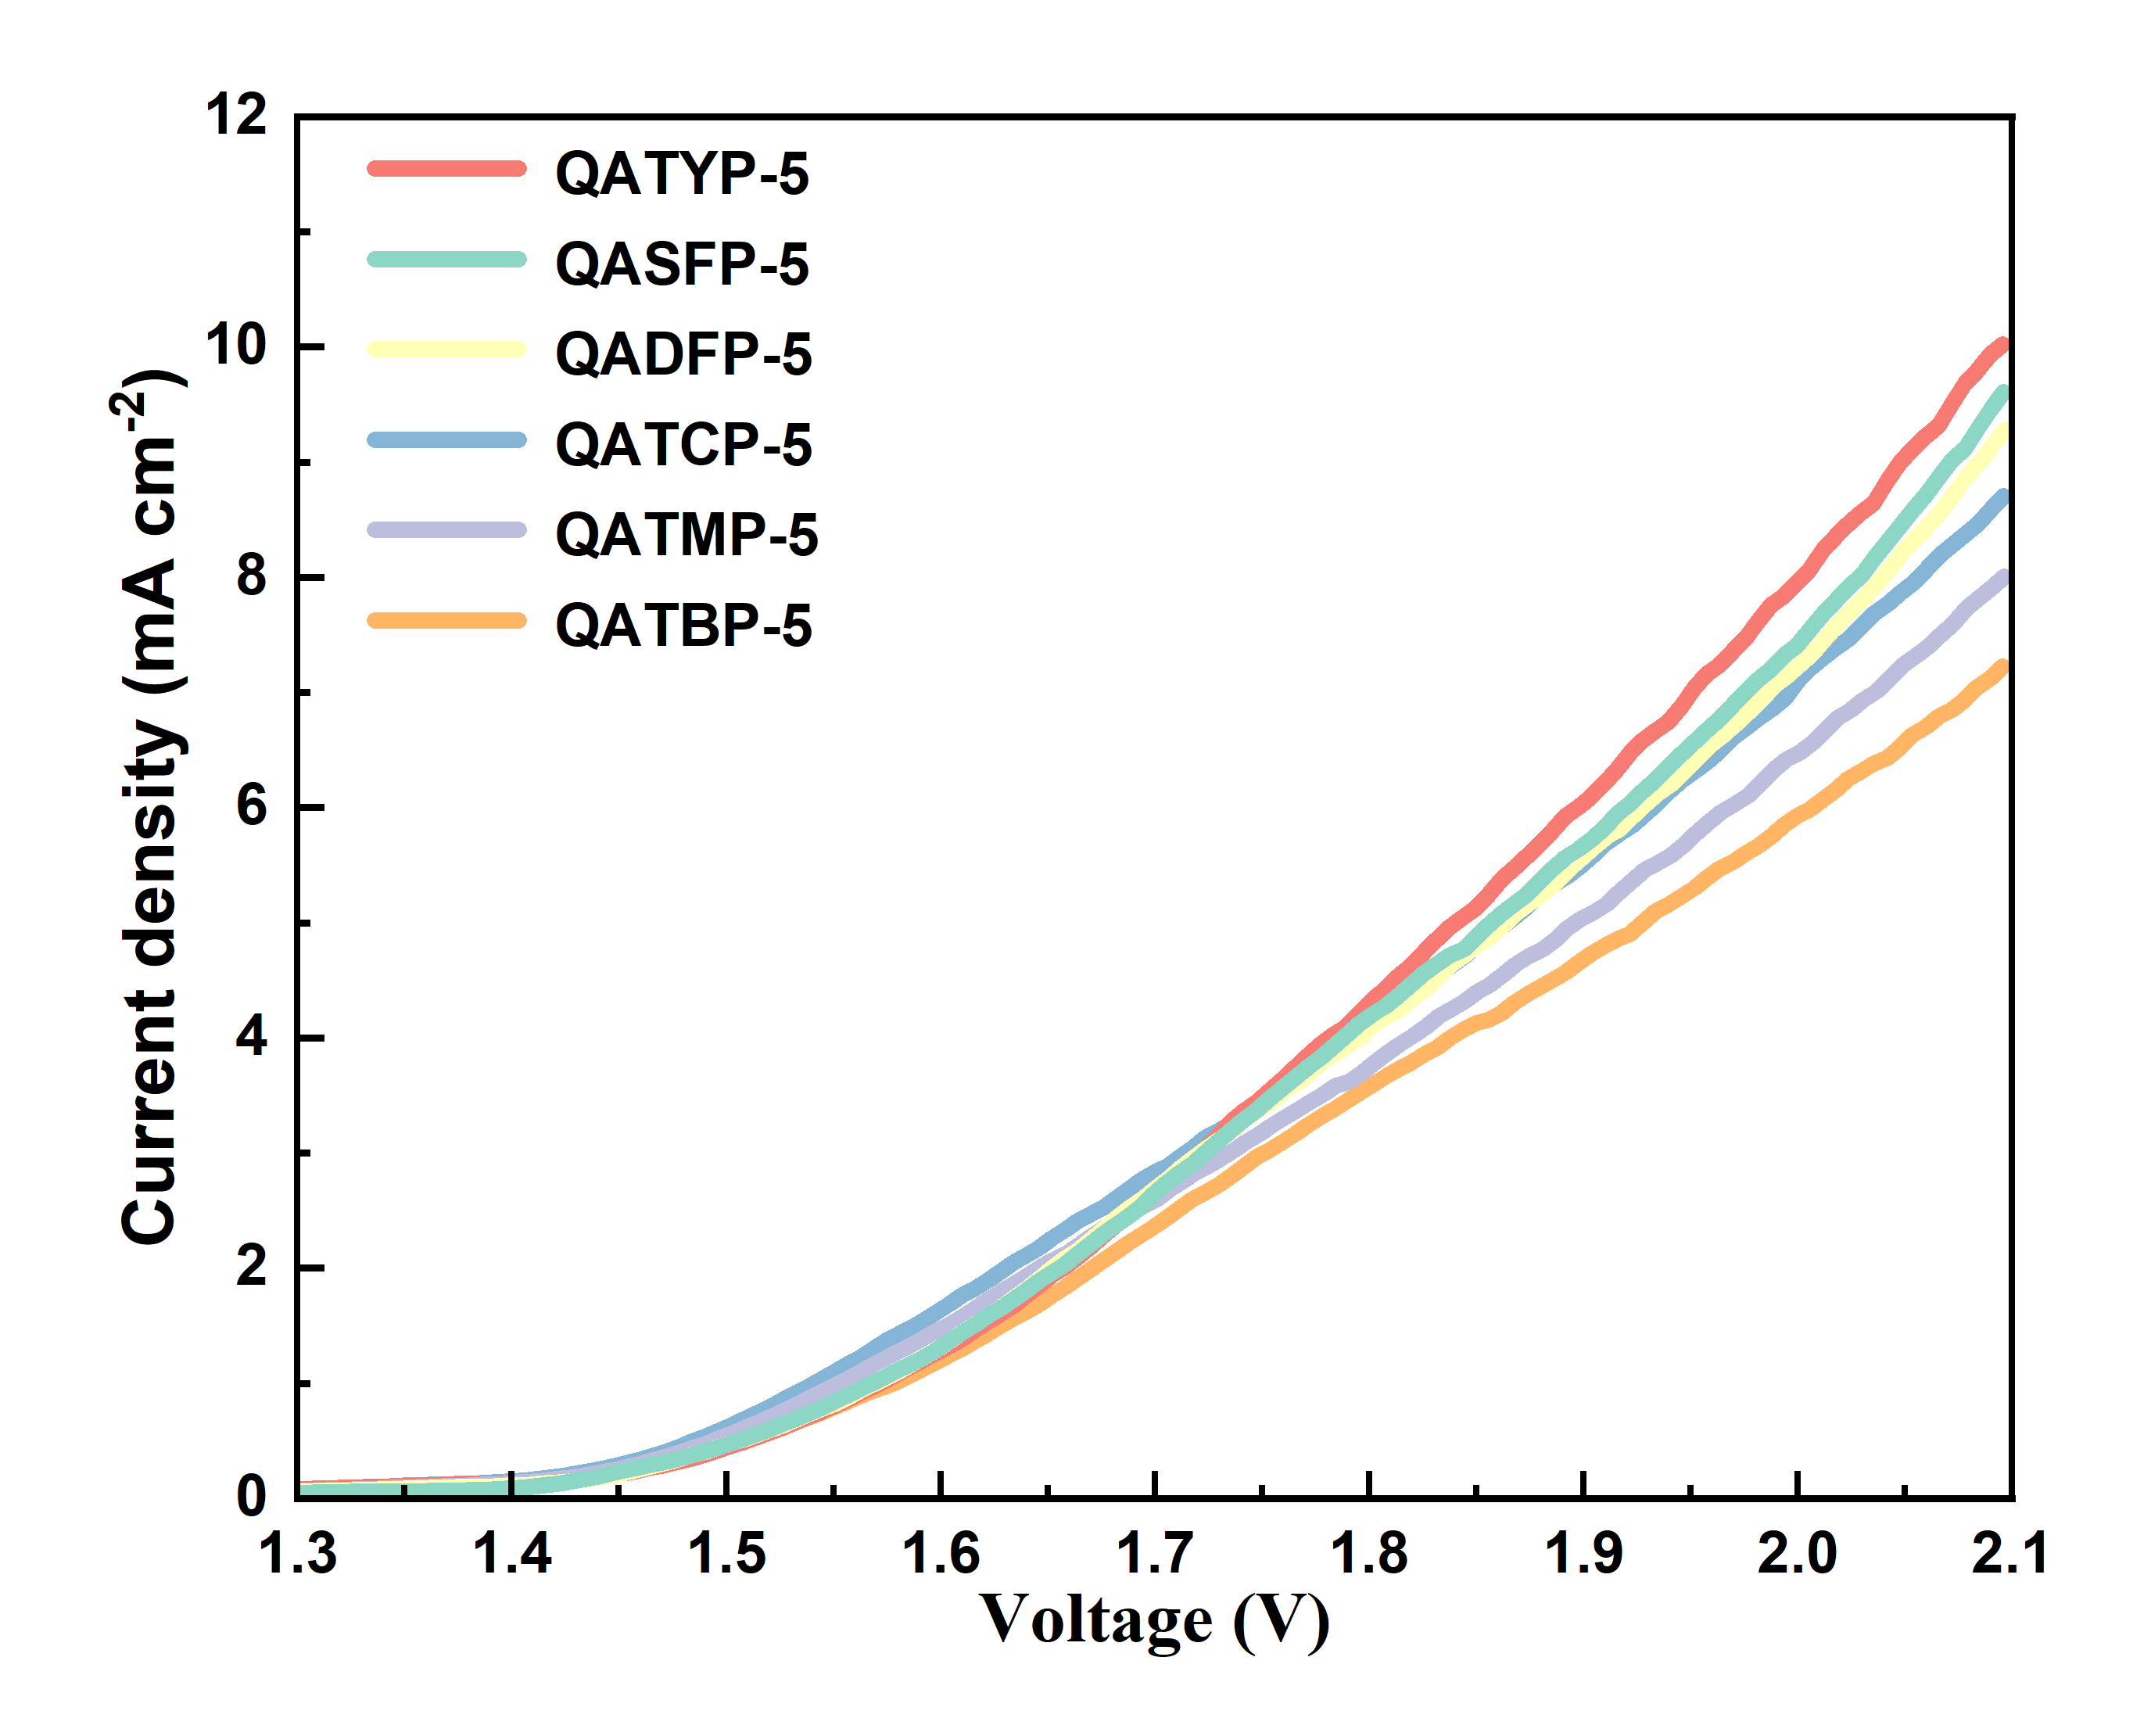


**Supplementary Fig. 16** AEMWE tests of different membranes.

**
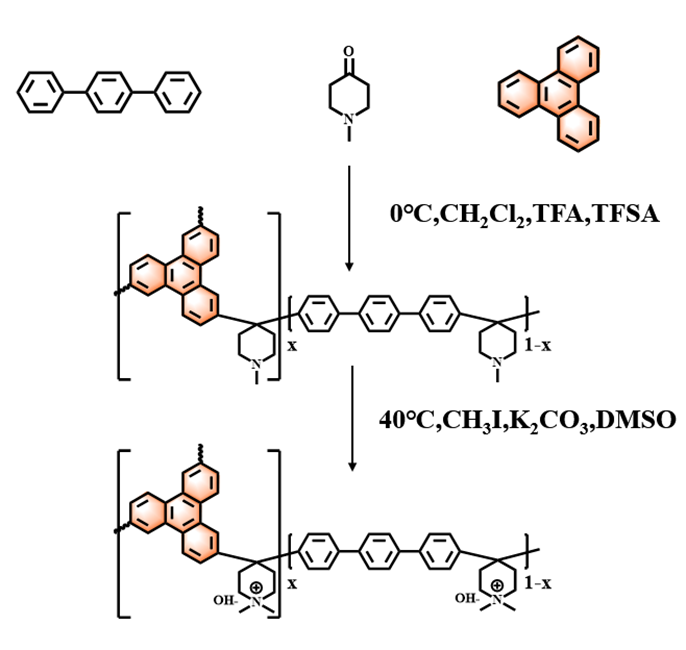
**

**Supplementary Fig. 17** Synthesis route of PTYP-x and QPTYP-x.


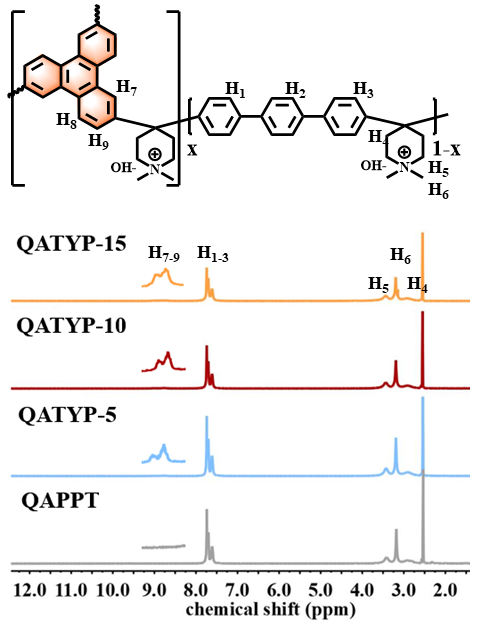


**Supplementary Fig. 18** 1H-NMR of QAPPT and QPTYP-x.


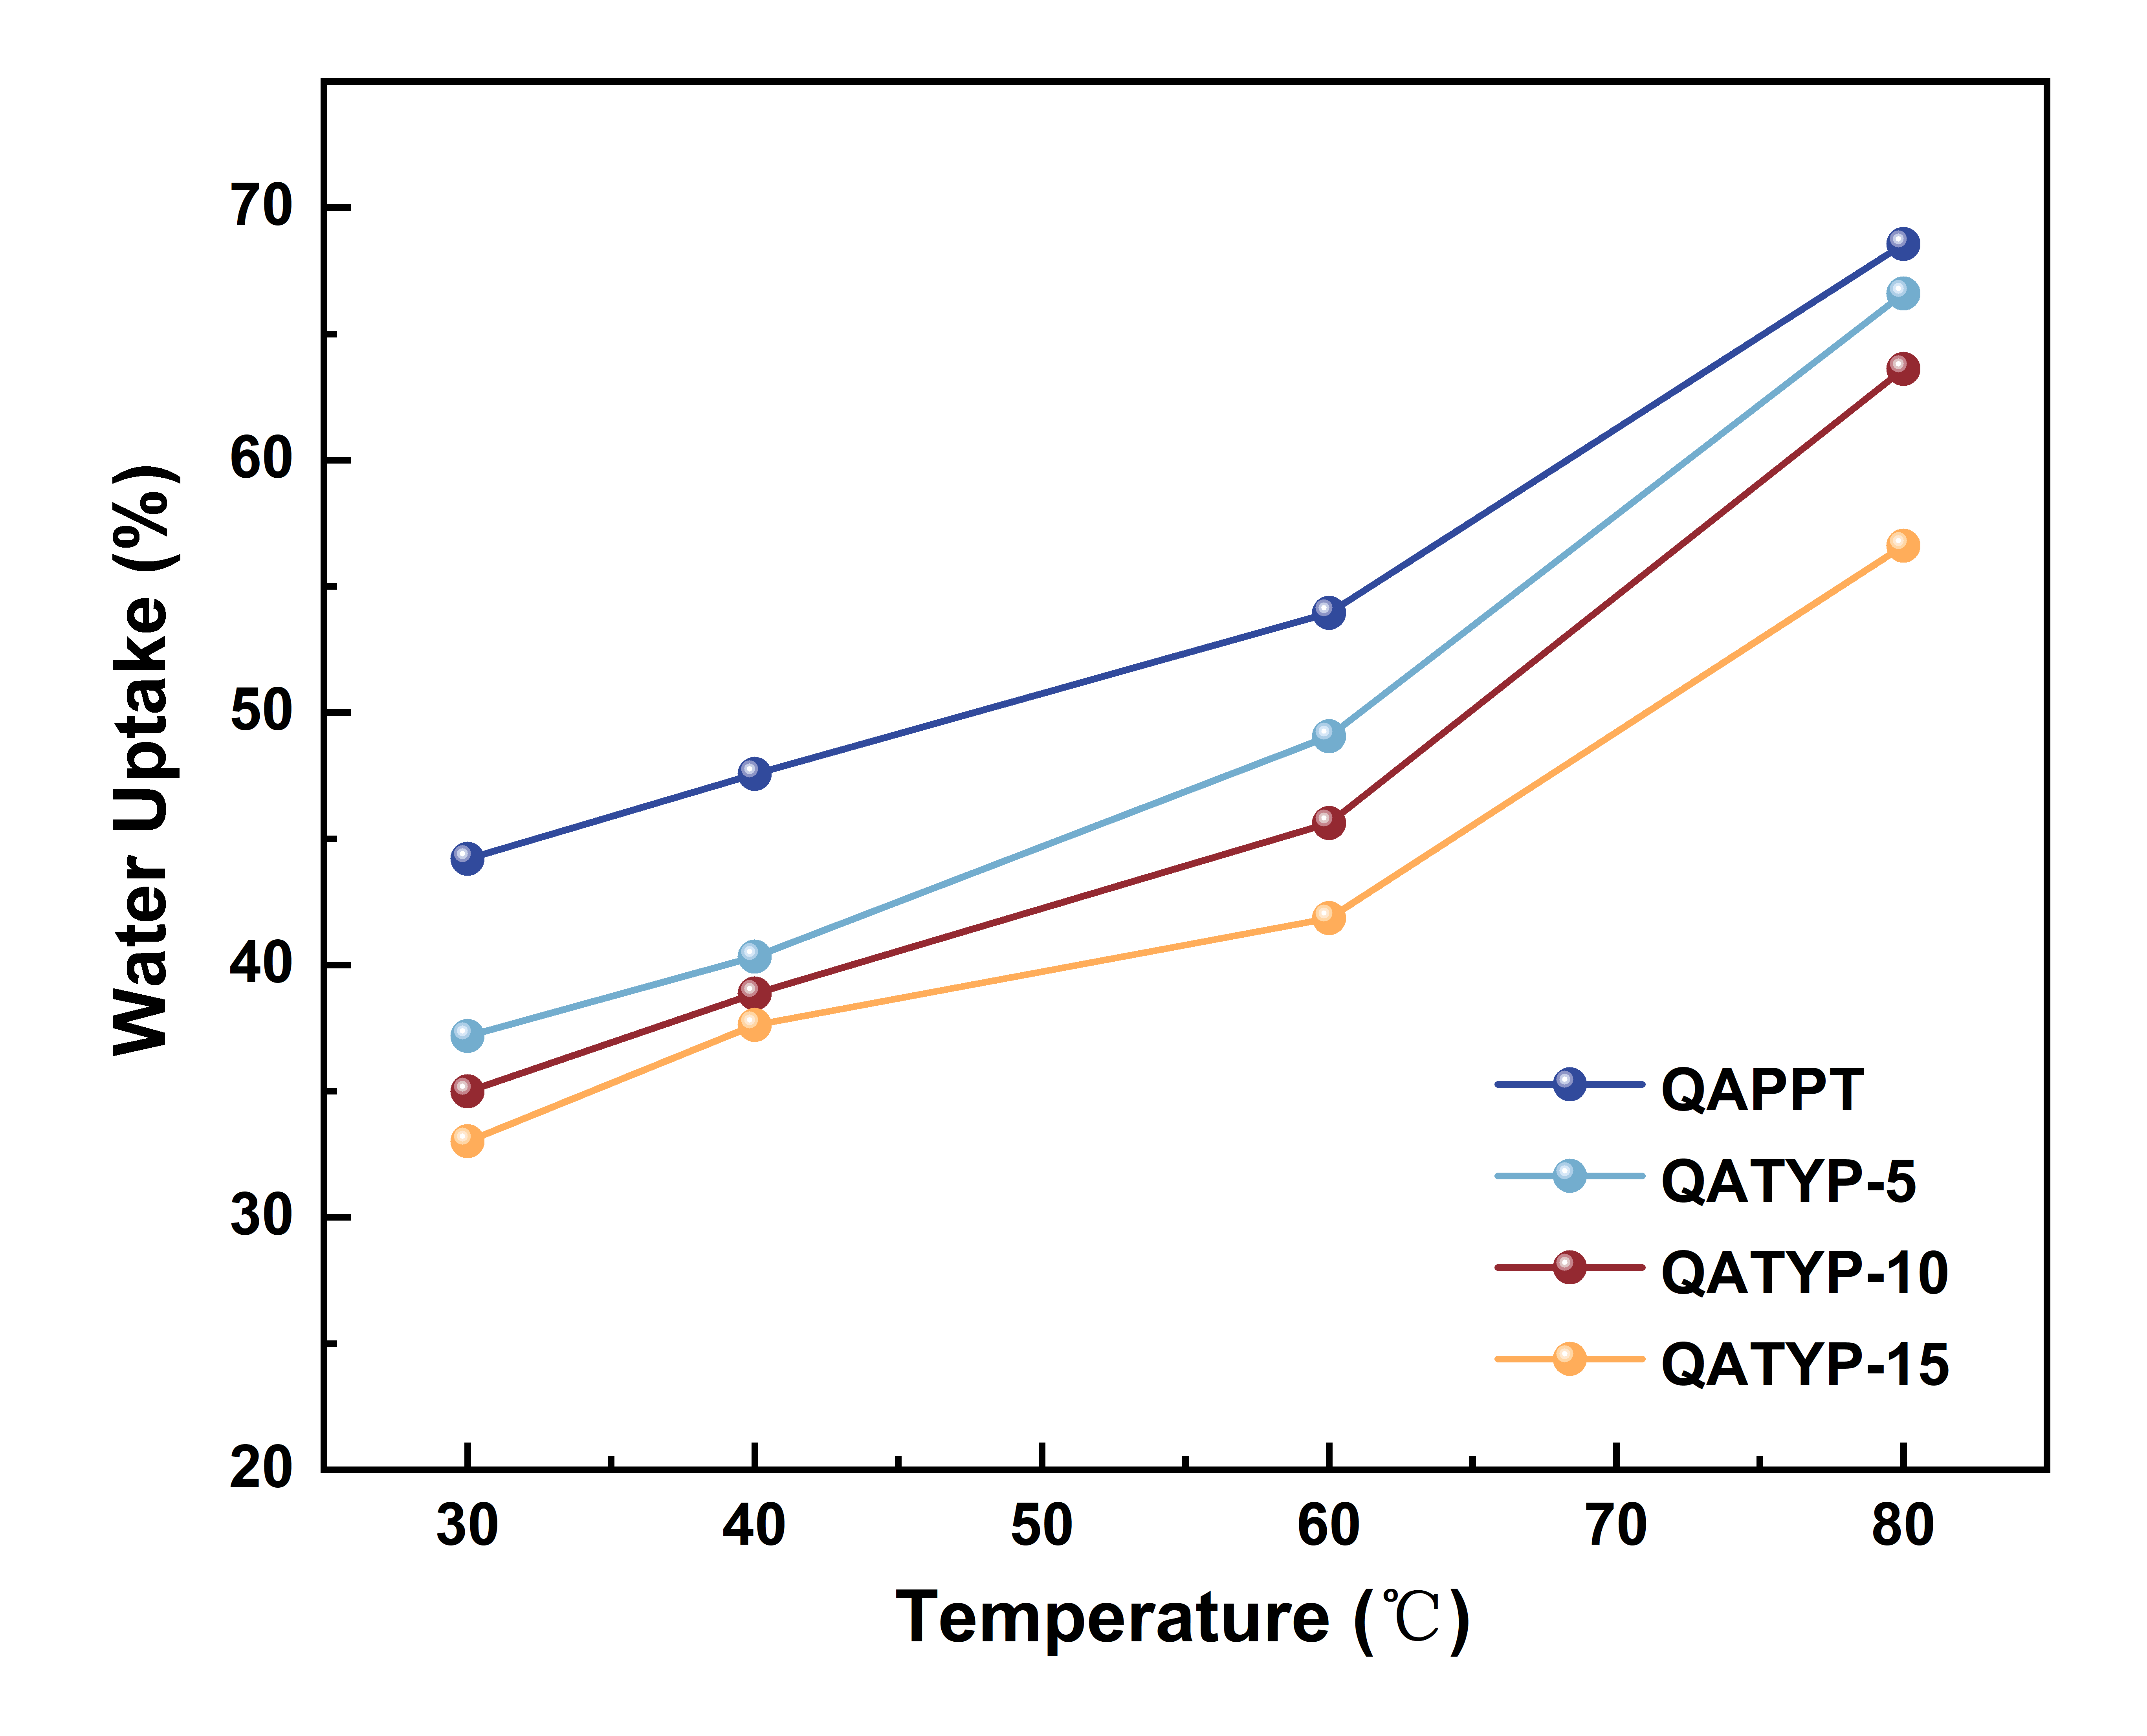


**Supplementary Fig. 19** WU of QAPPT and QPTYP-x.


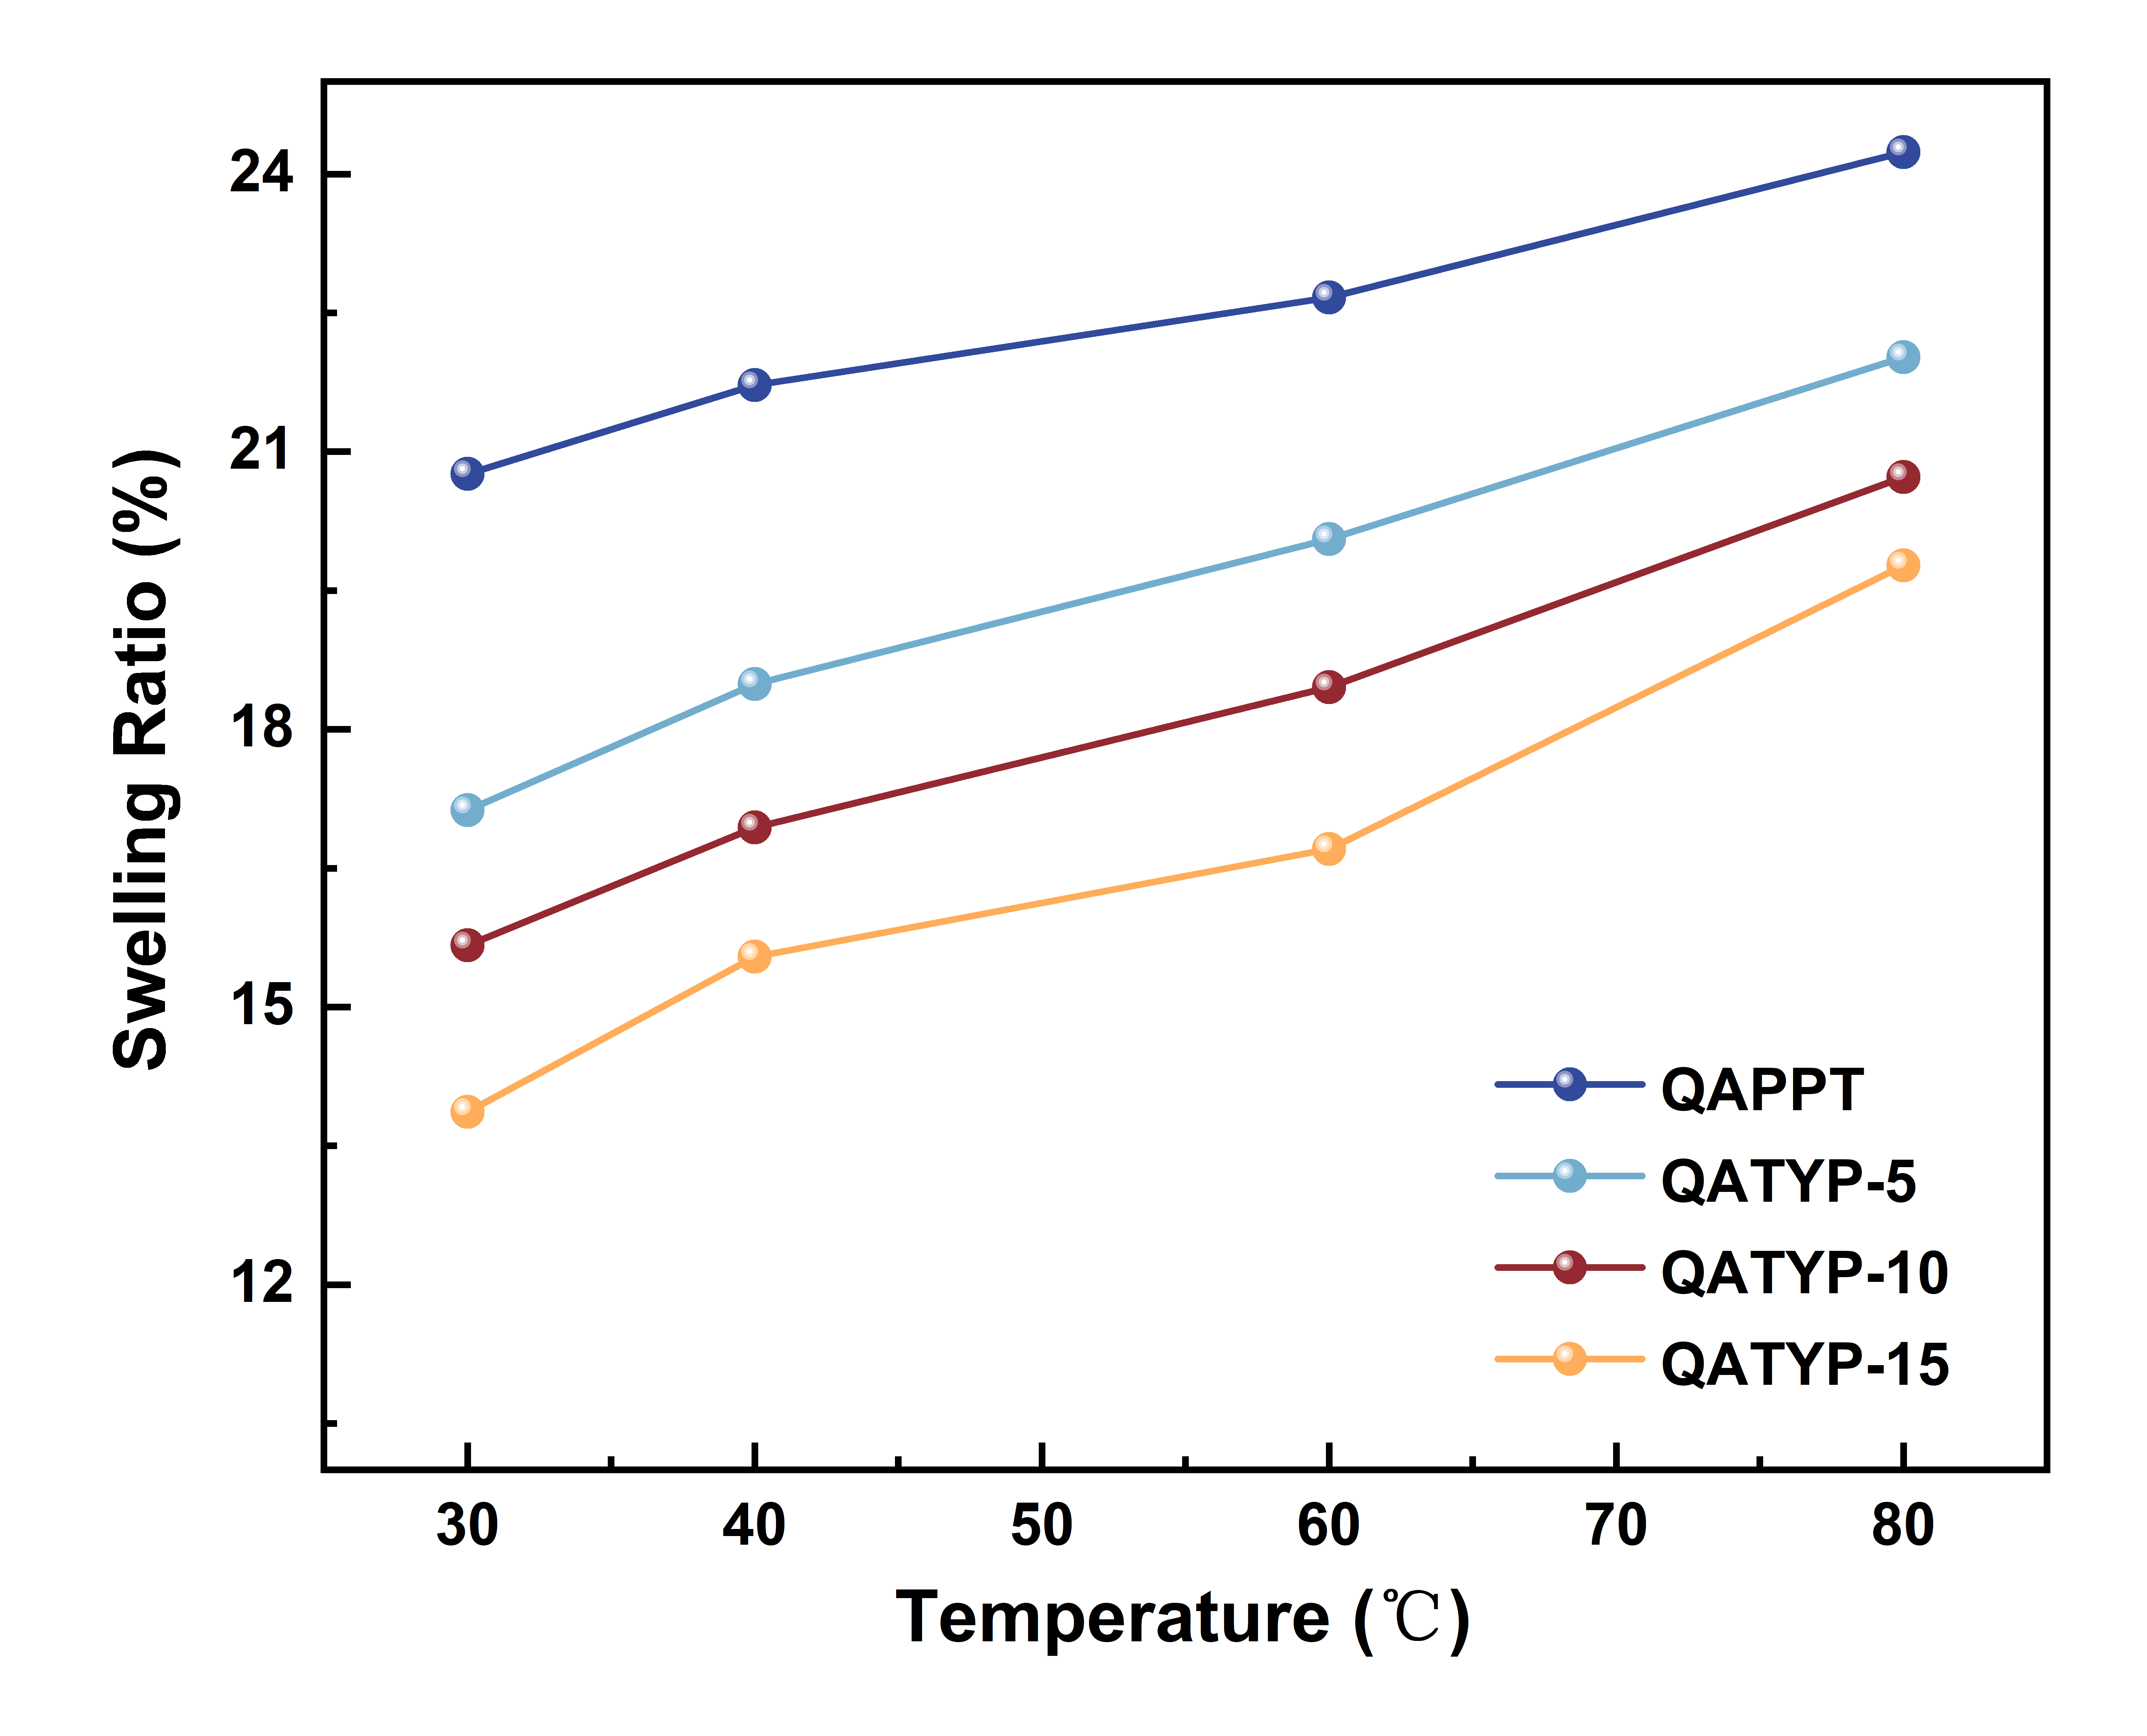


**Supplementary Fig. 20** SR of QAPPT and QPTYP-x.


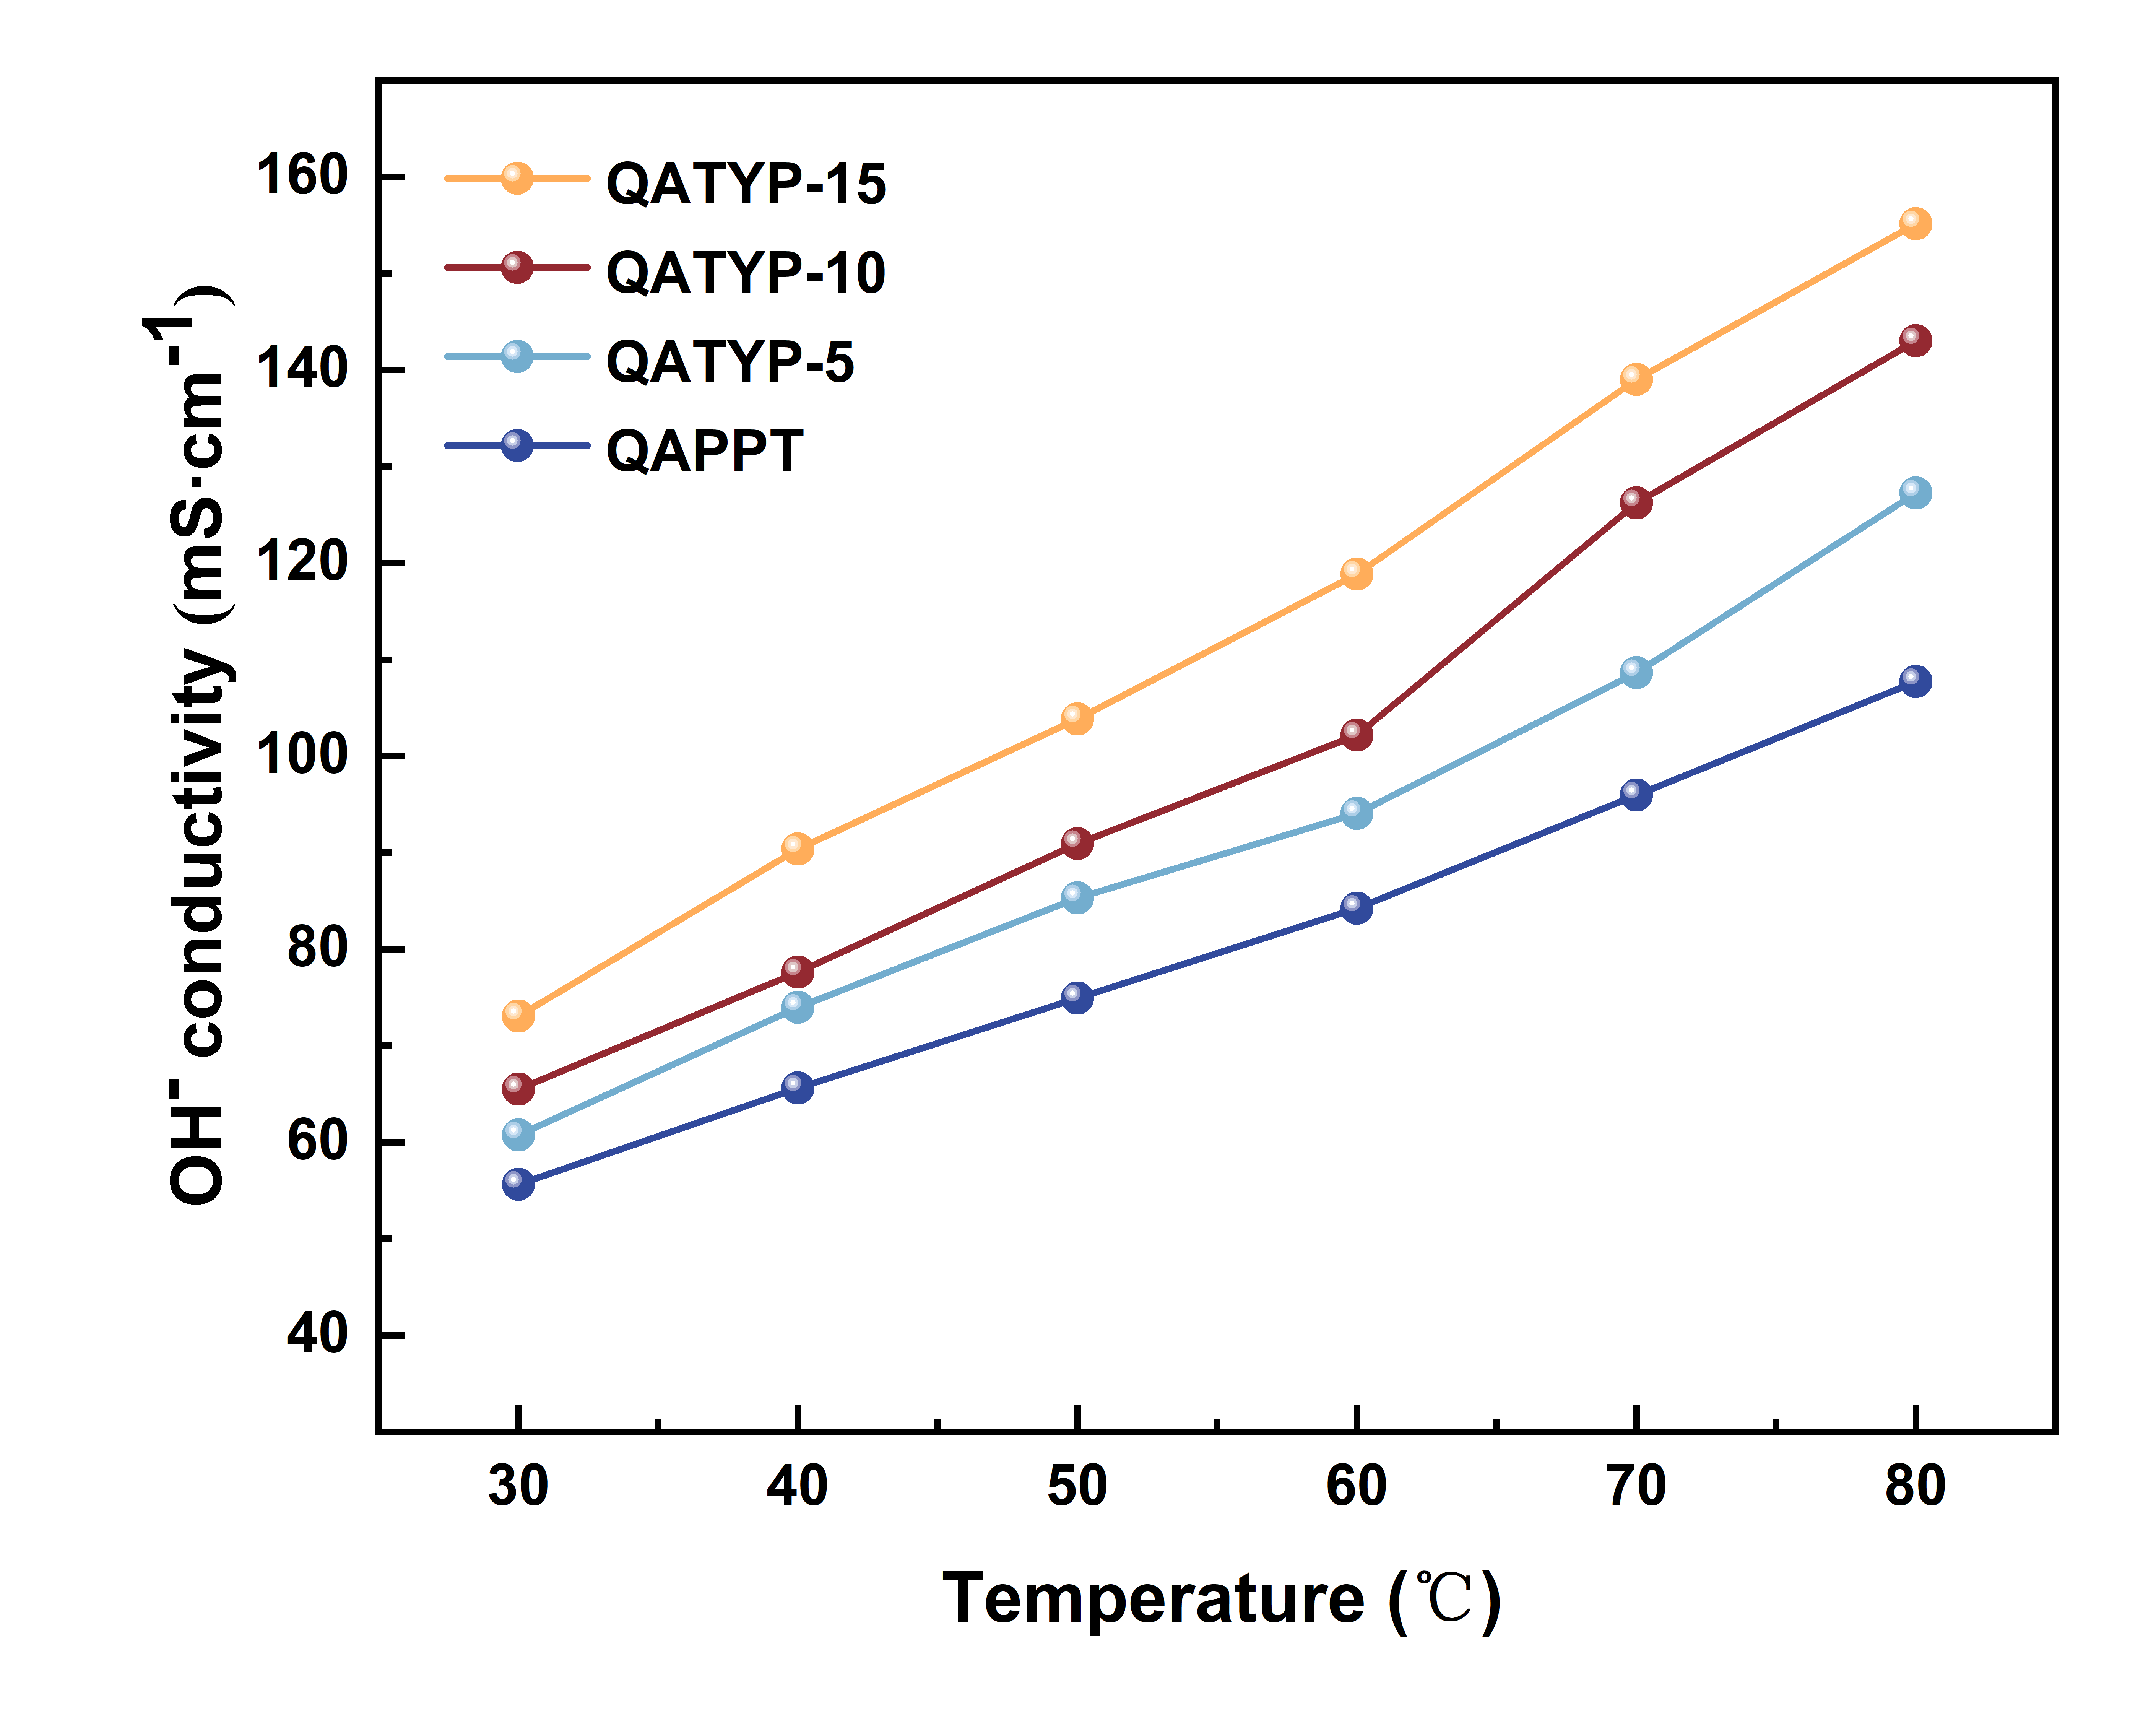


**Supplementary Fig. 21** Conductivity of QAPPT and QPTYP-x.


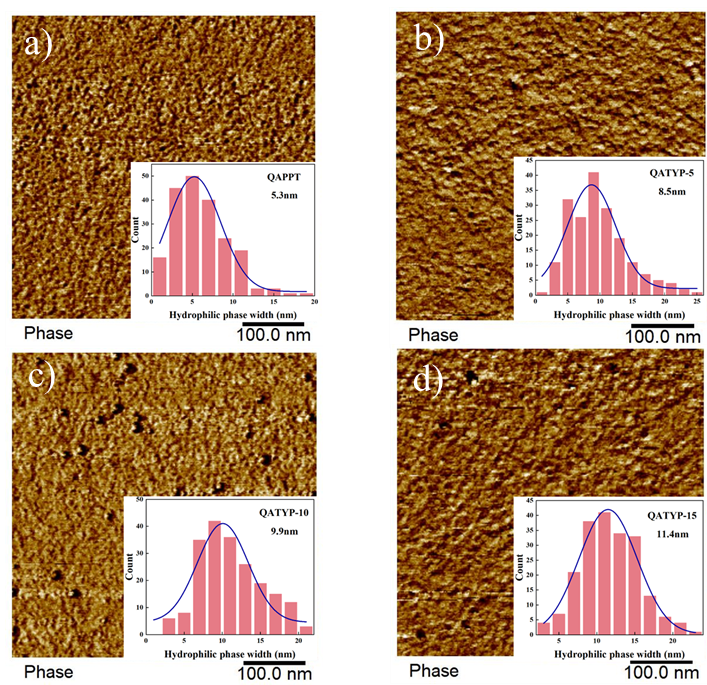


**Supplementary Fig. 22** AFM images of QAPPT and QATYP. **a** QAPPT. **b** QATYP-5.

**c** QATYP-10. **d** QATYP-15.





**Supplementary Fig. 23** g(r)N-H2O of QAPPT at different hydration numbers.


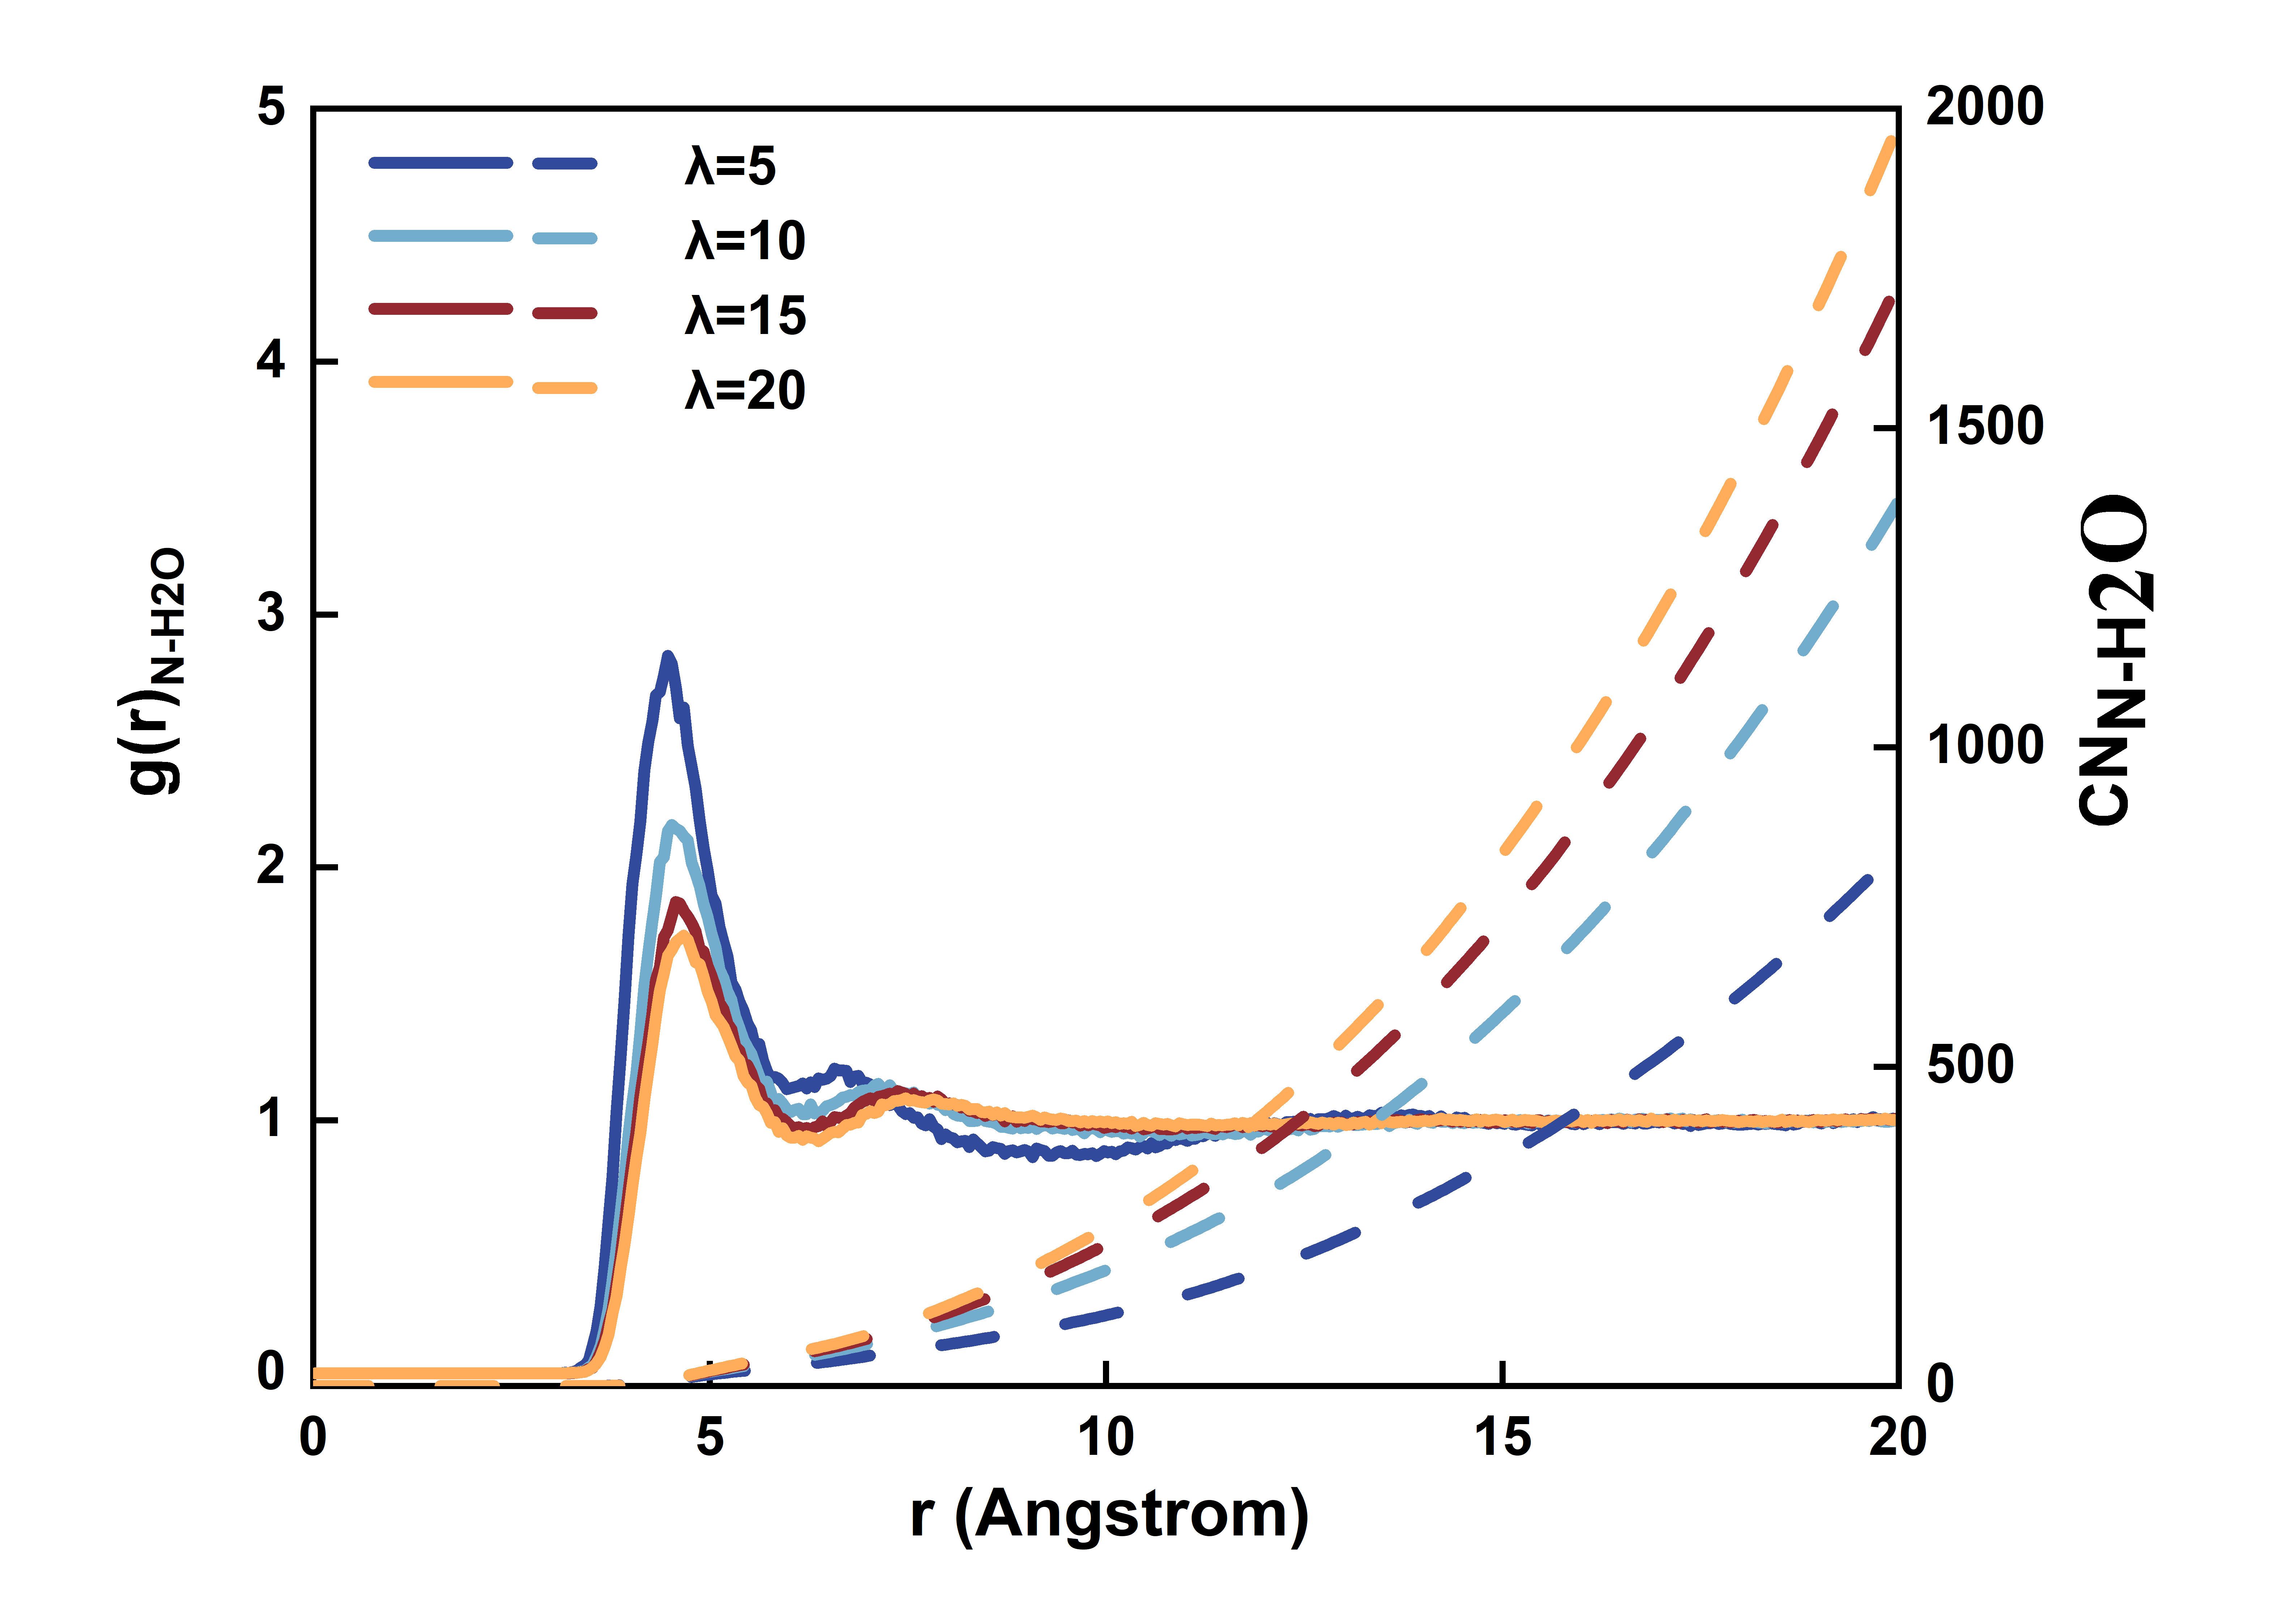


**Supplementary Fig. 24** g(r)N-H2O of QATYP-15 at different hydration numbers.


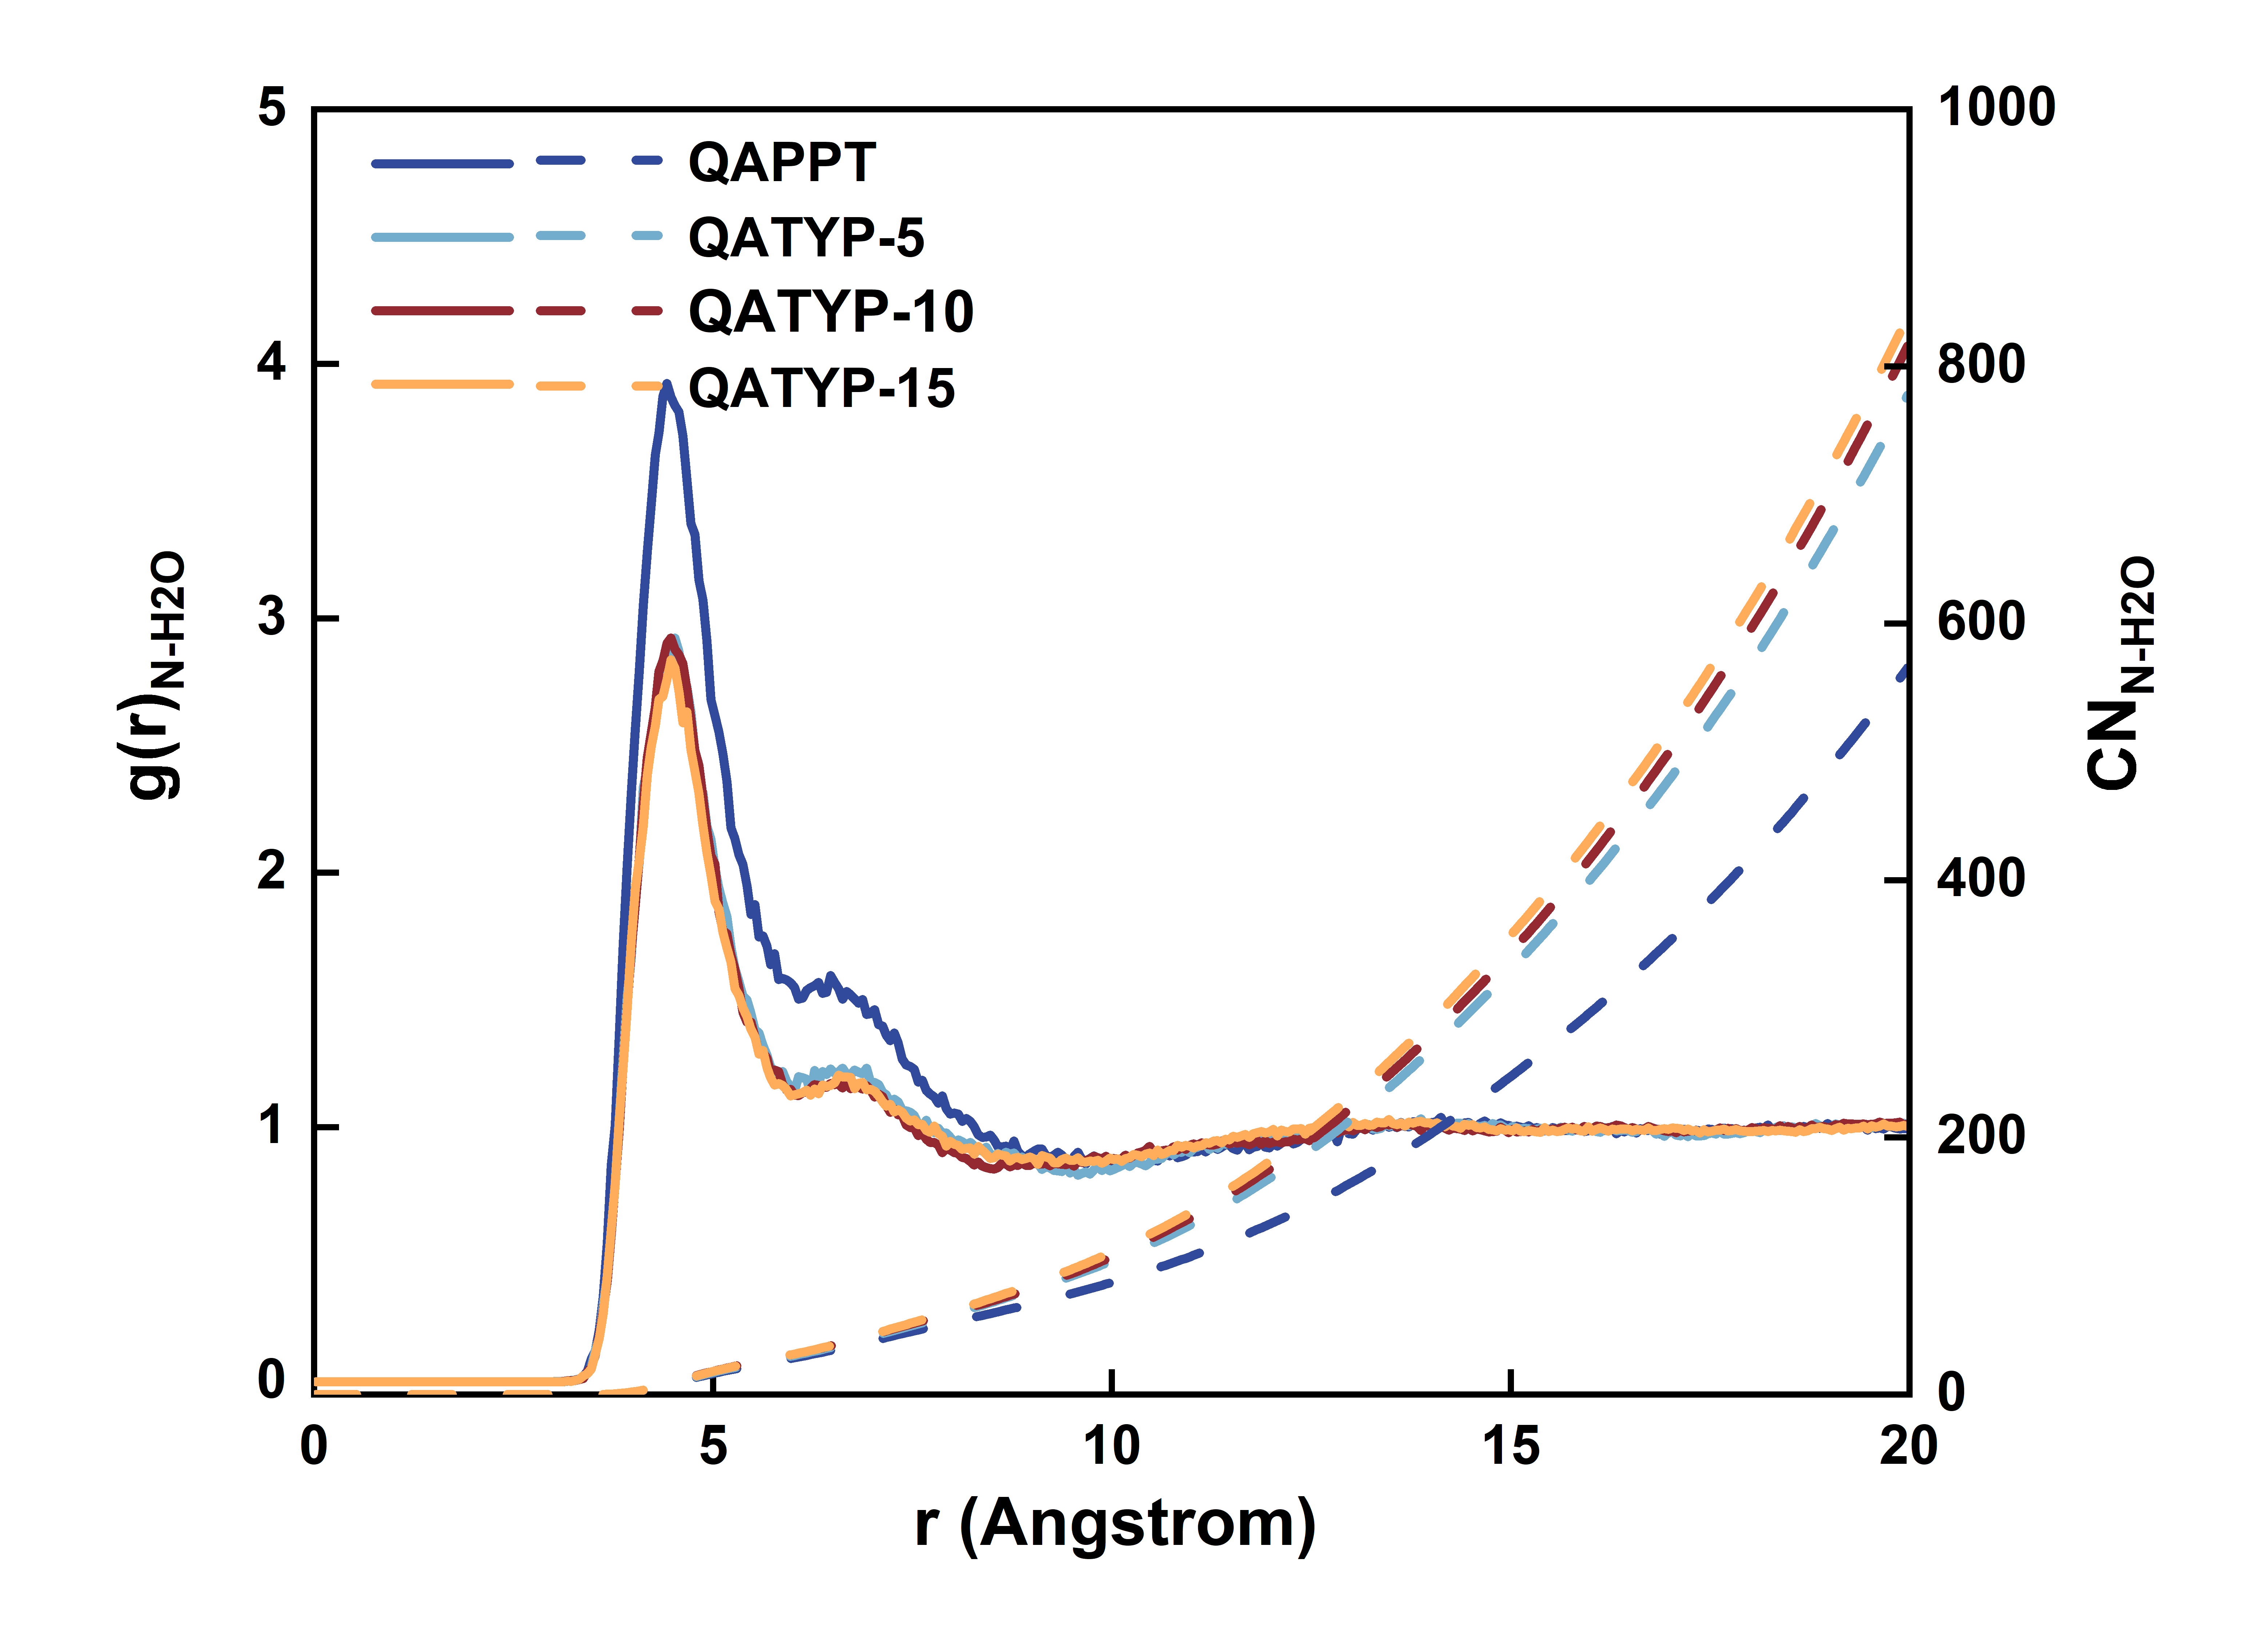


**Supplementary Fig. 25** g(r)N-H2O of QAPPT and QATYP-x at λ=5.


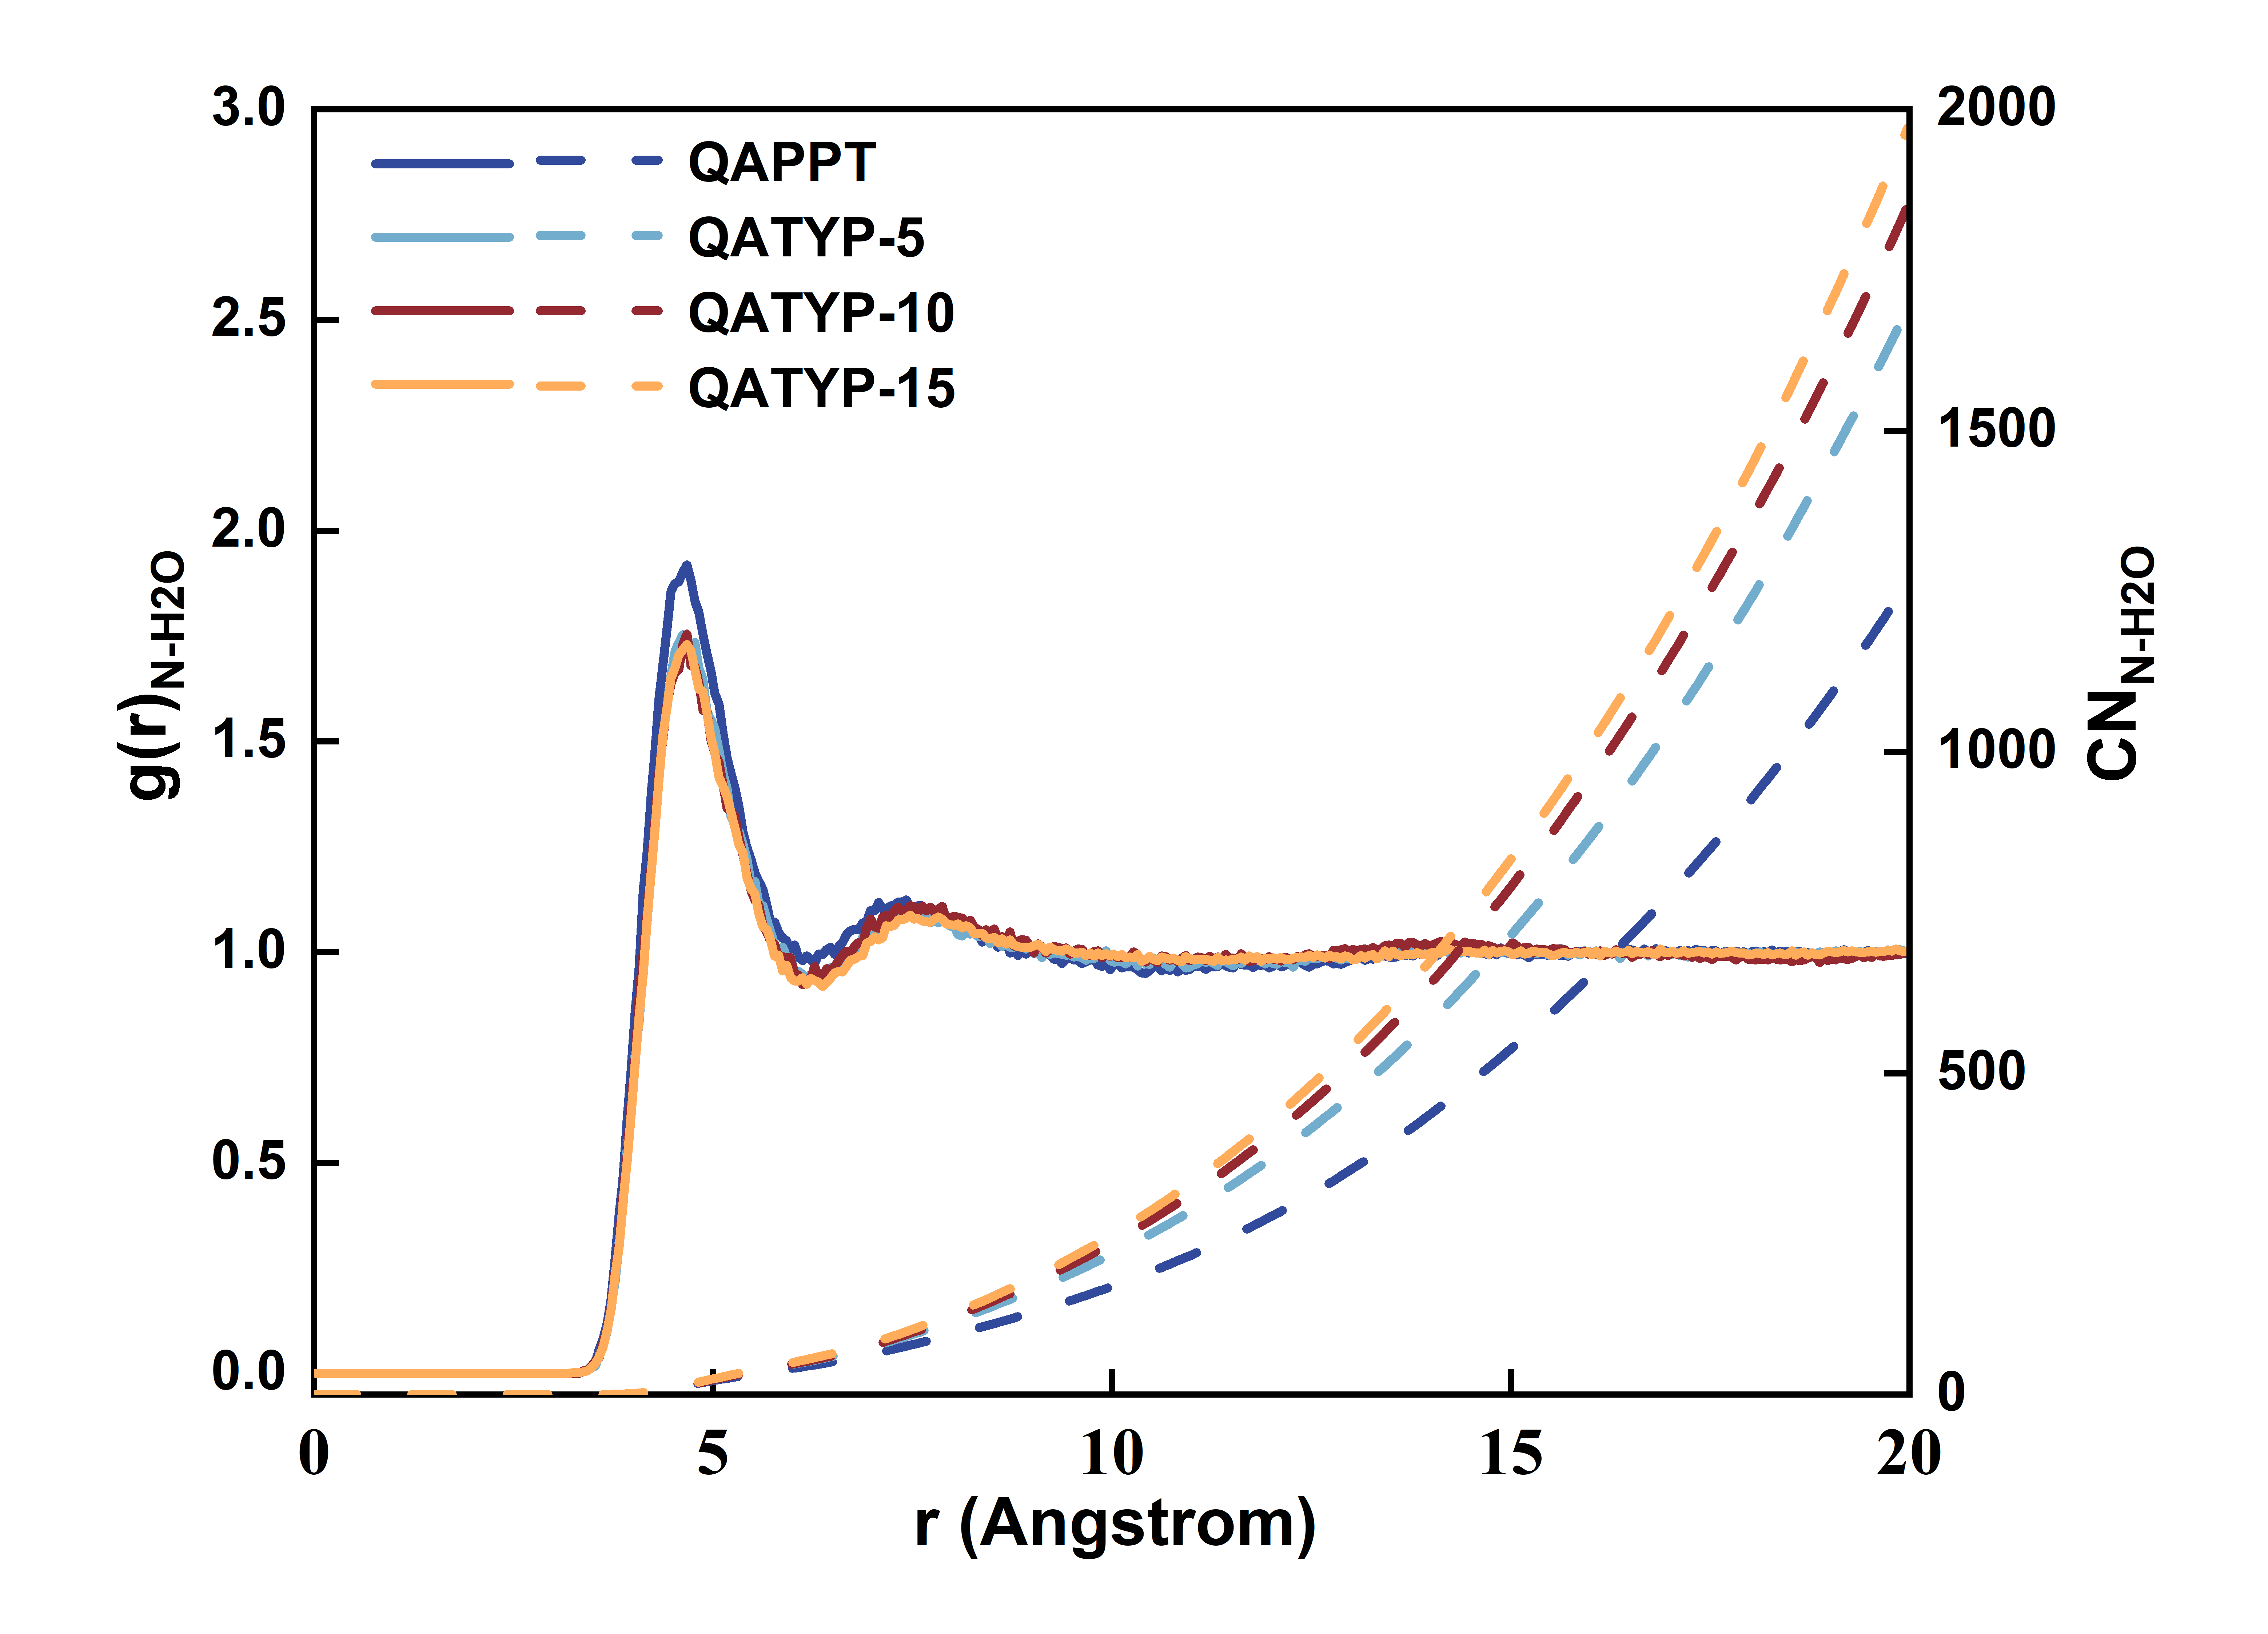


**Supplementary Fig. 26** g(r)N-H2O of QAPPT and QATYP-x at λ=20.


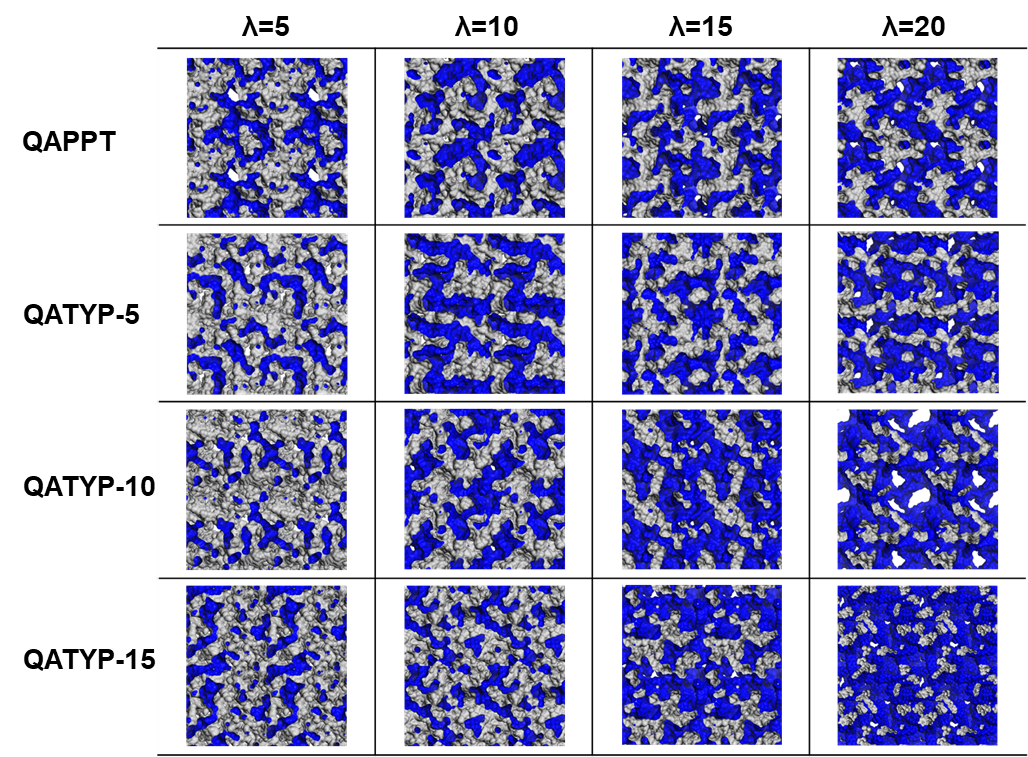


**Supplementary Fig. 27** Hydroxide ion channel morphology simulation of QAPPT and QATYP-x at different hydration numbers.


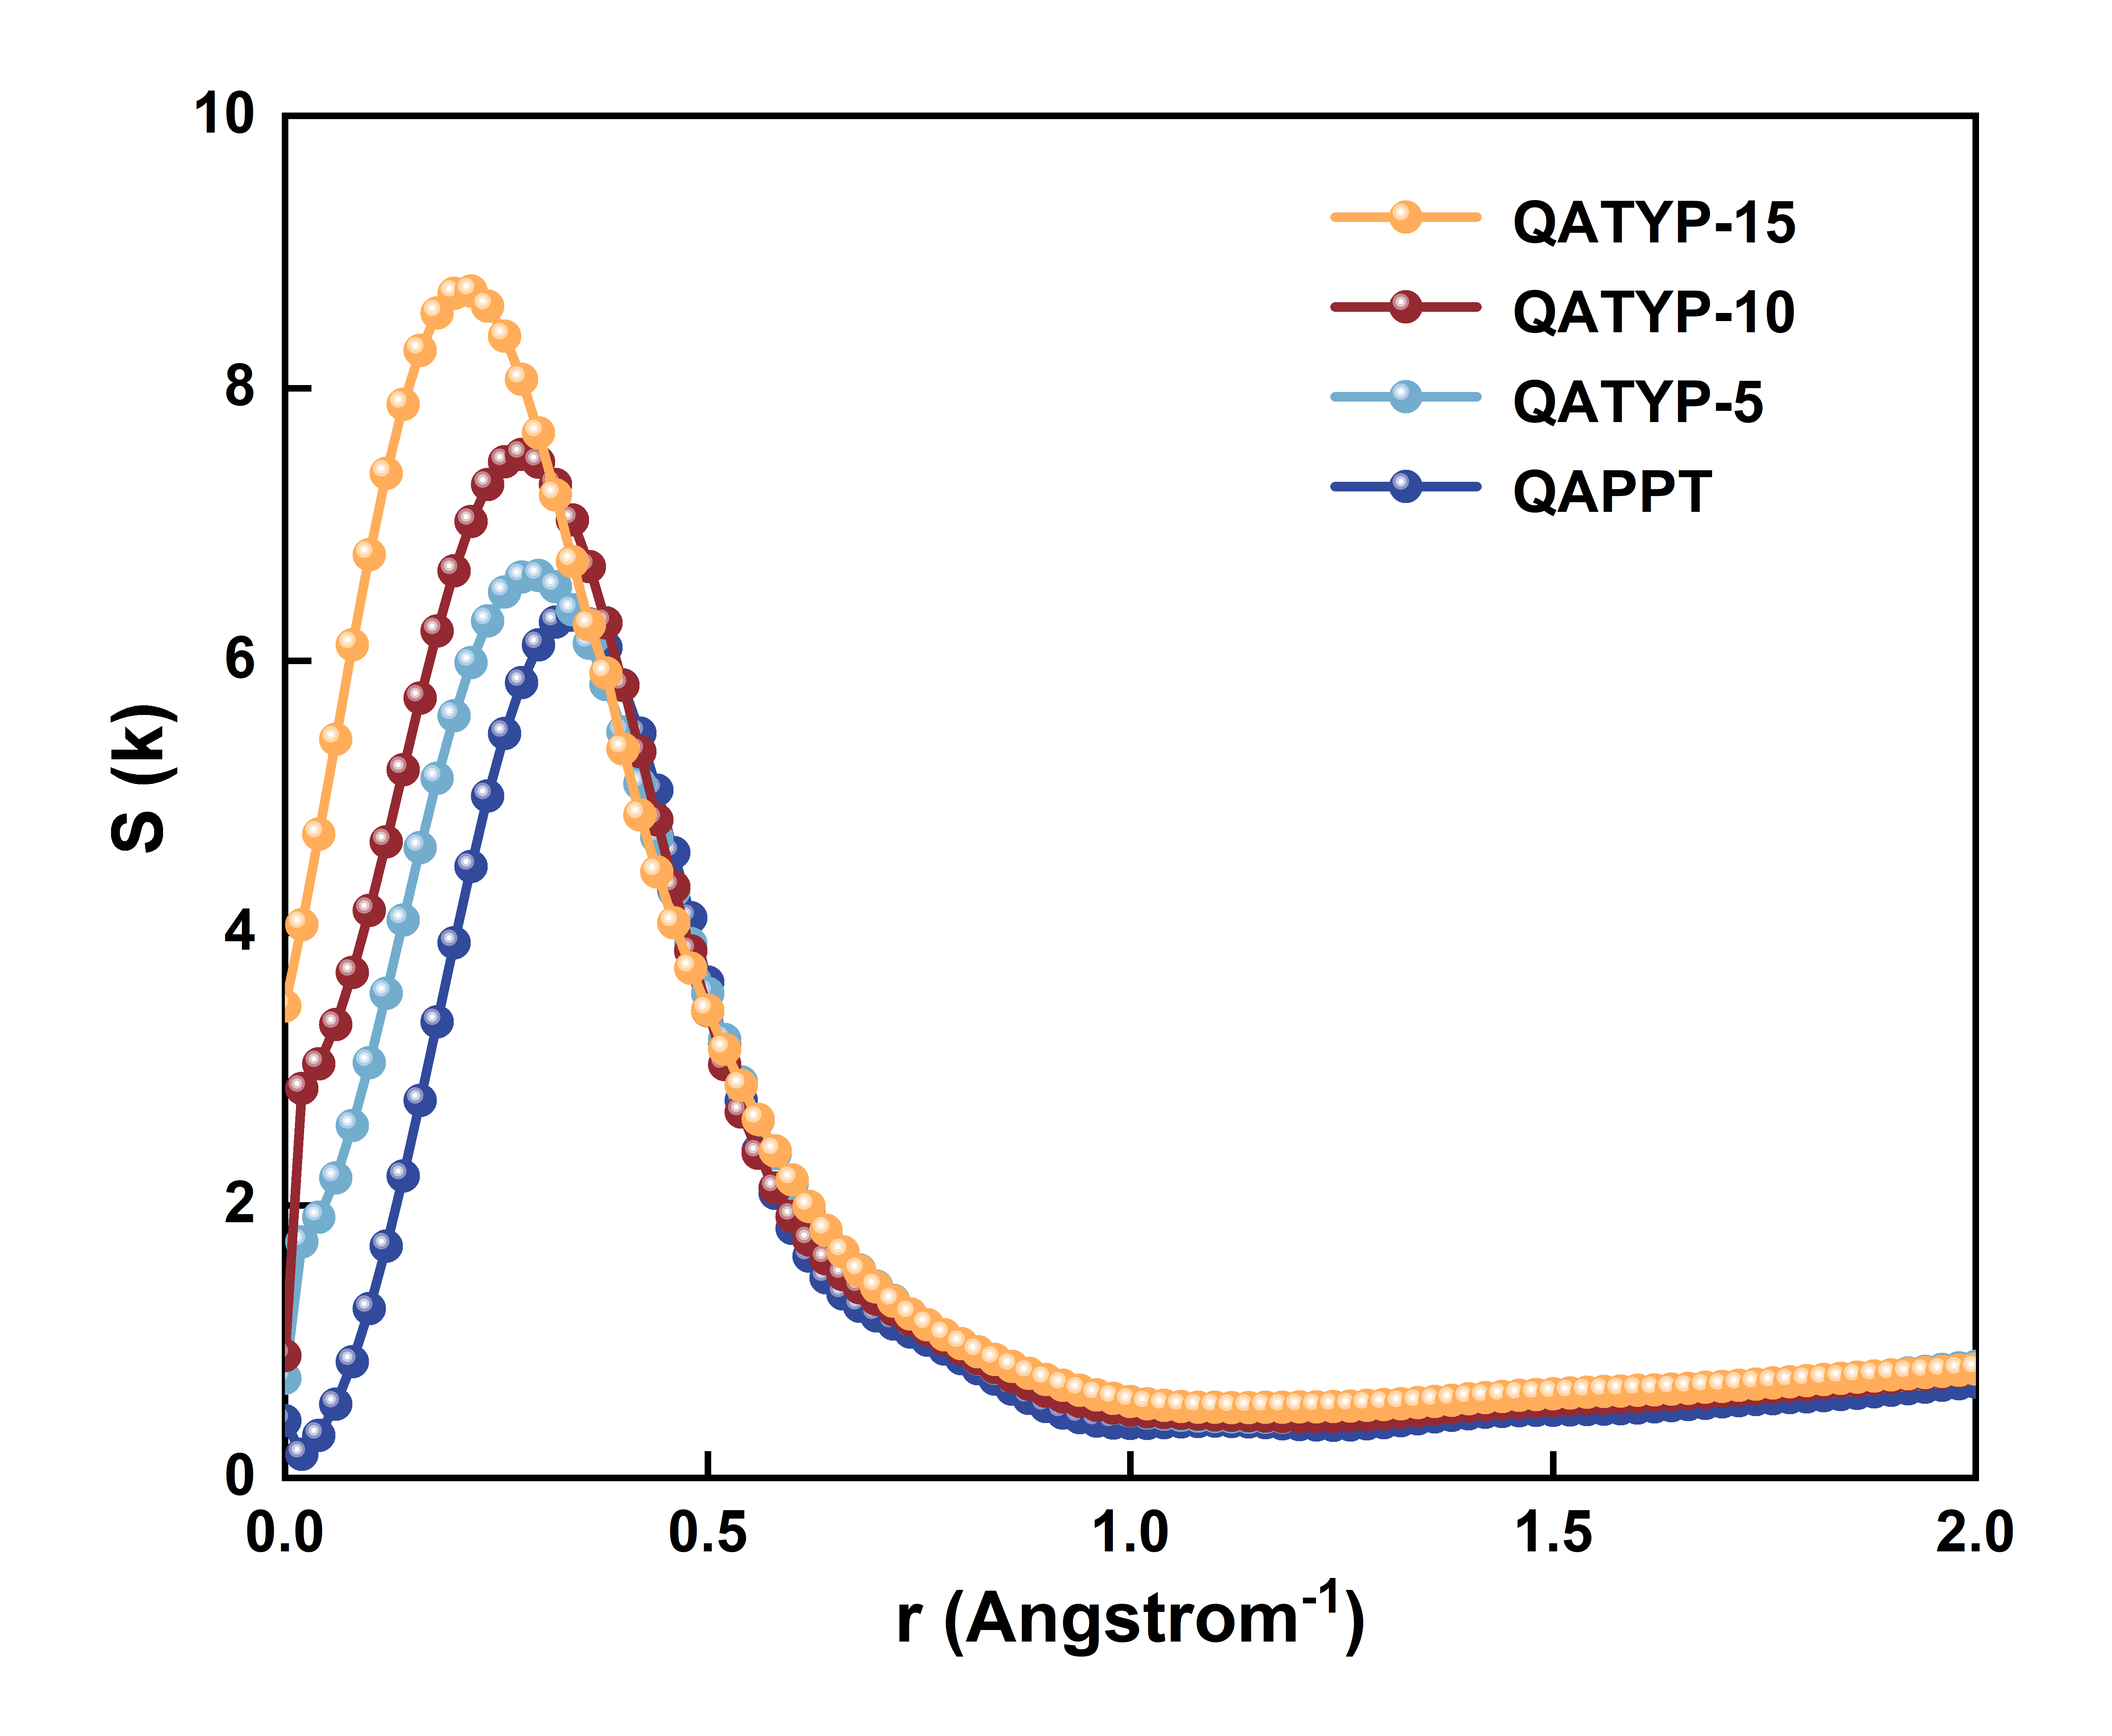


**Supplementary Fig. 28** Static structure factor of QAPPT and QATYP-x.


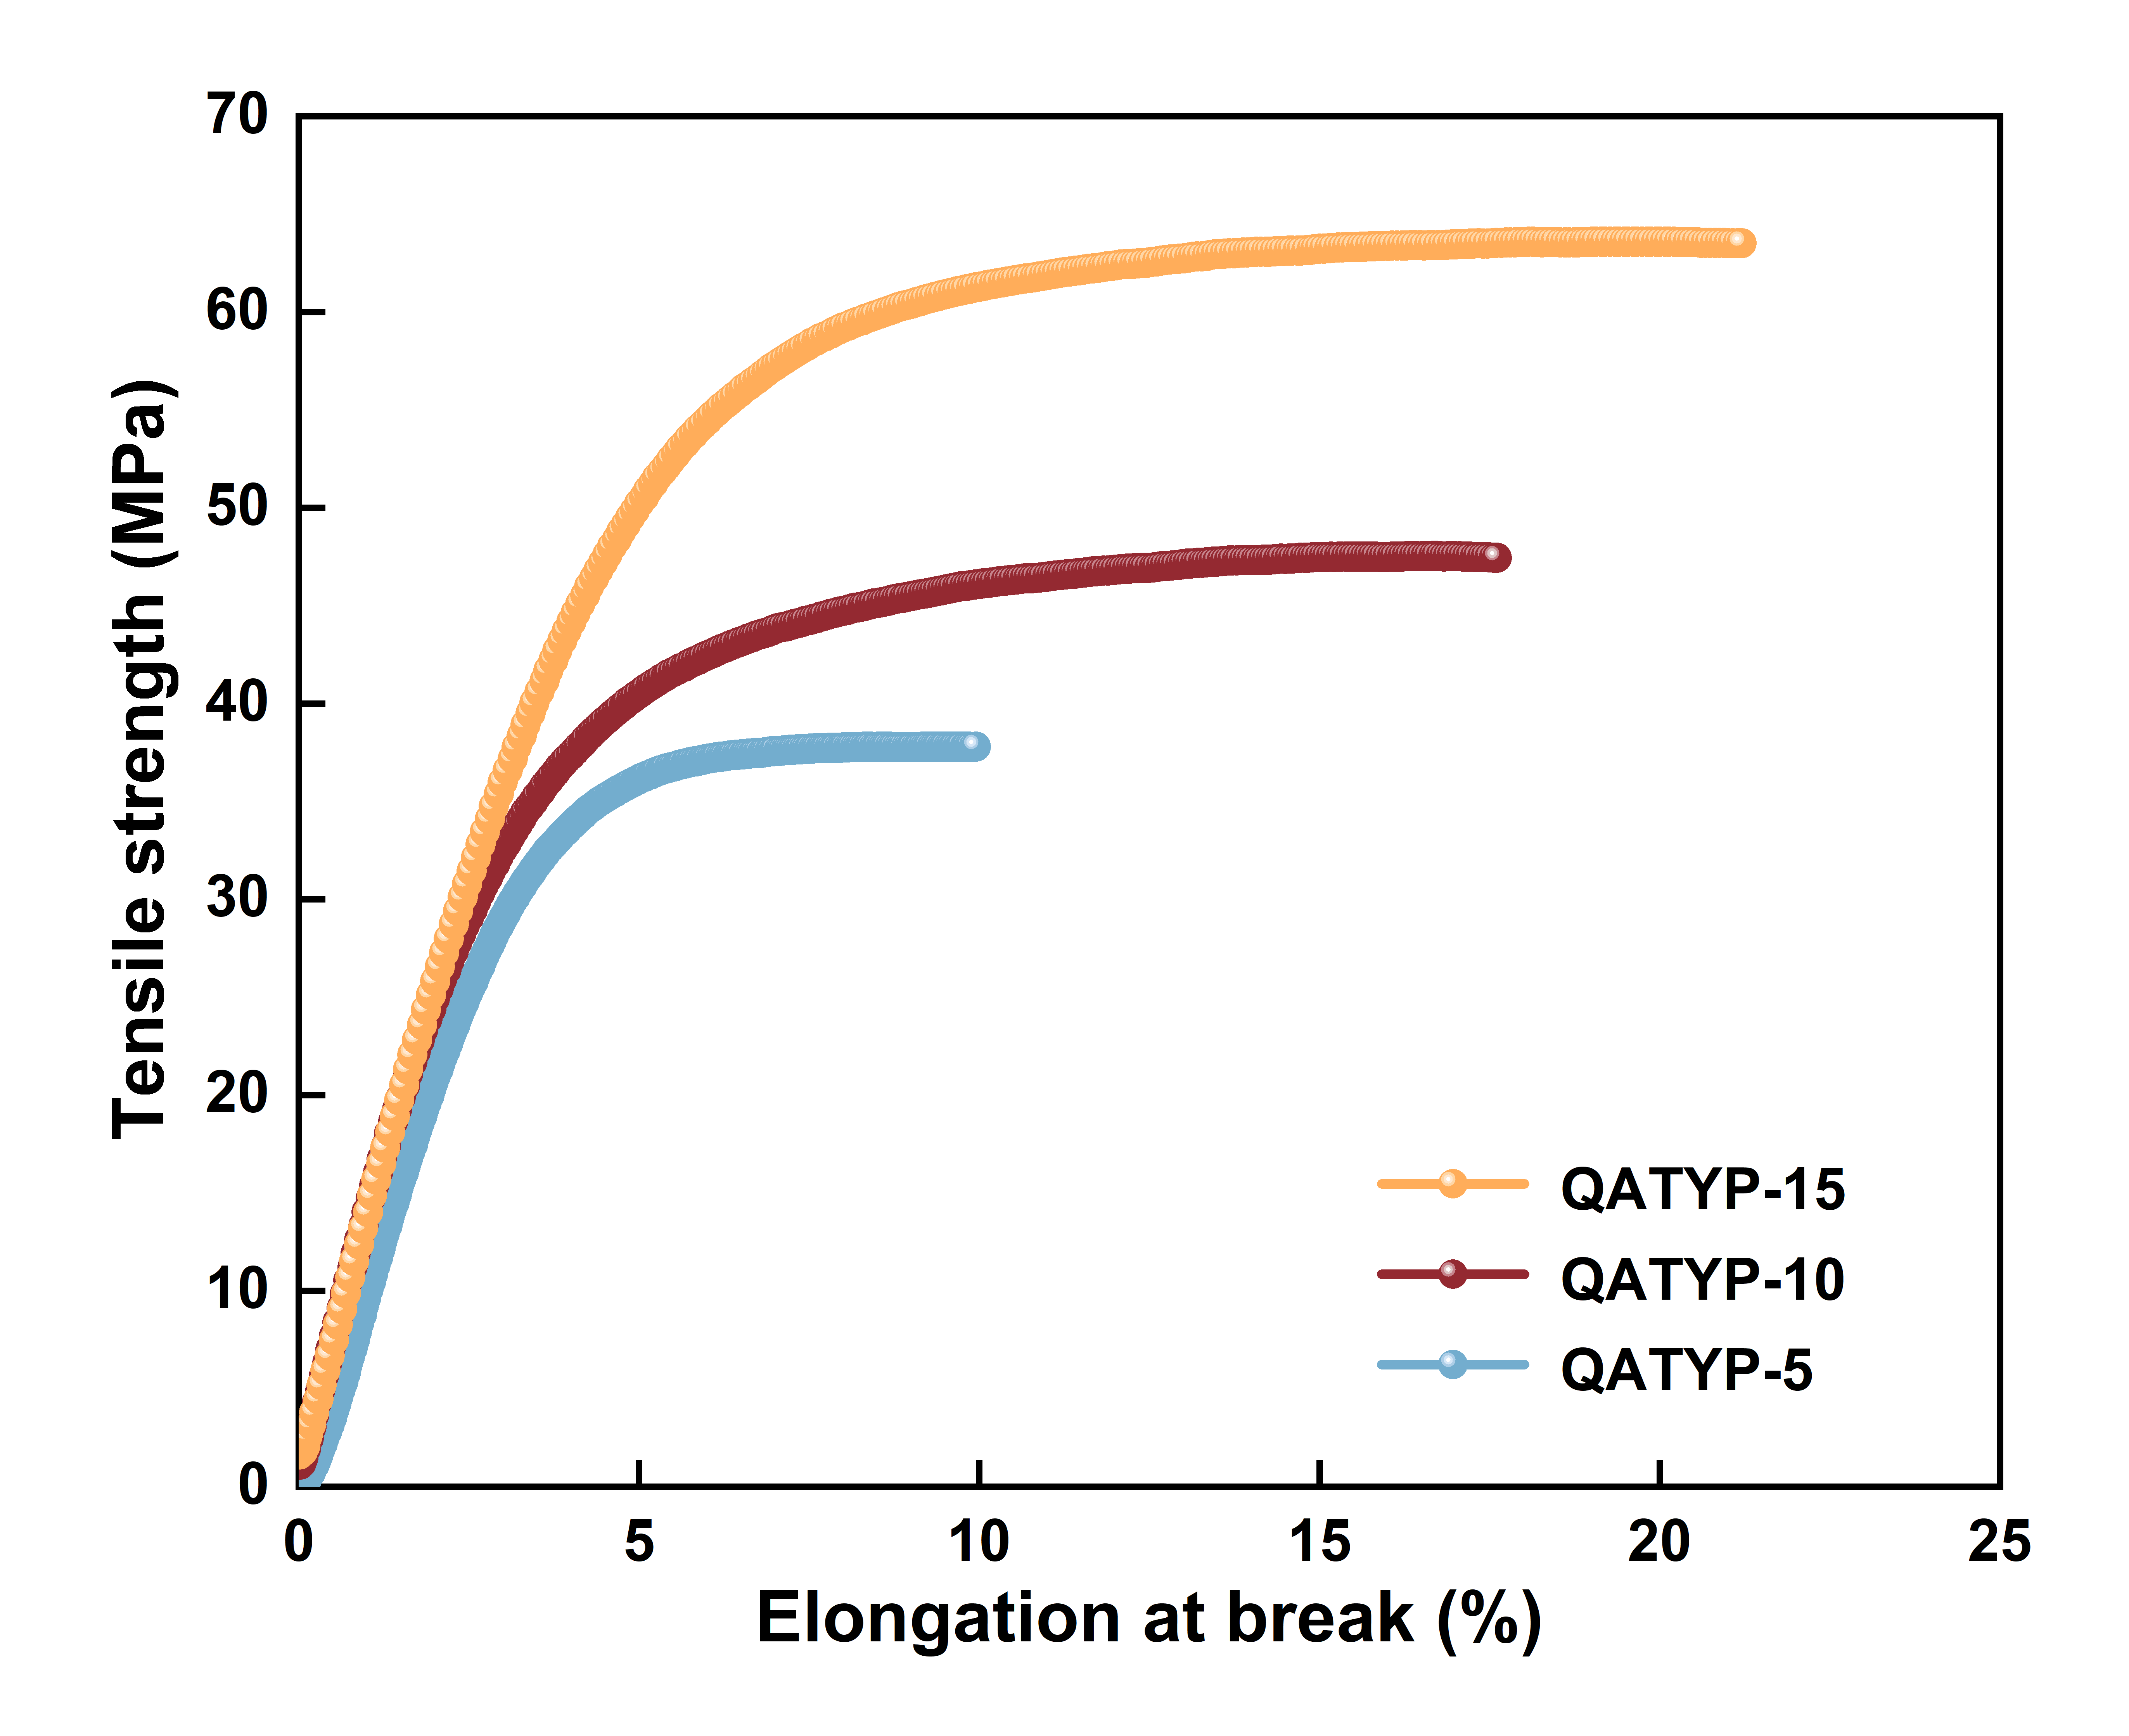


**Supplementary Fig. 29** Mechanical properties of QATYP-x.


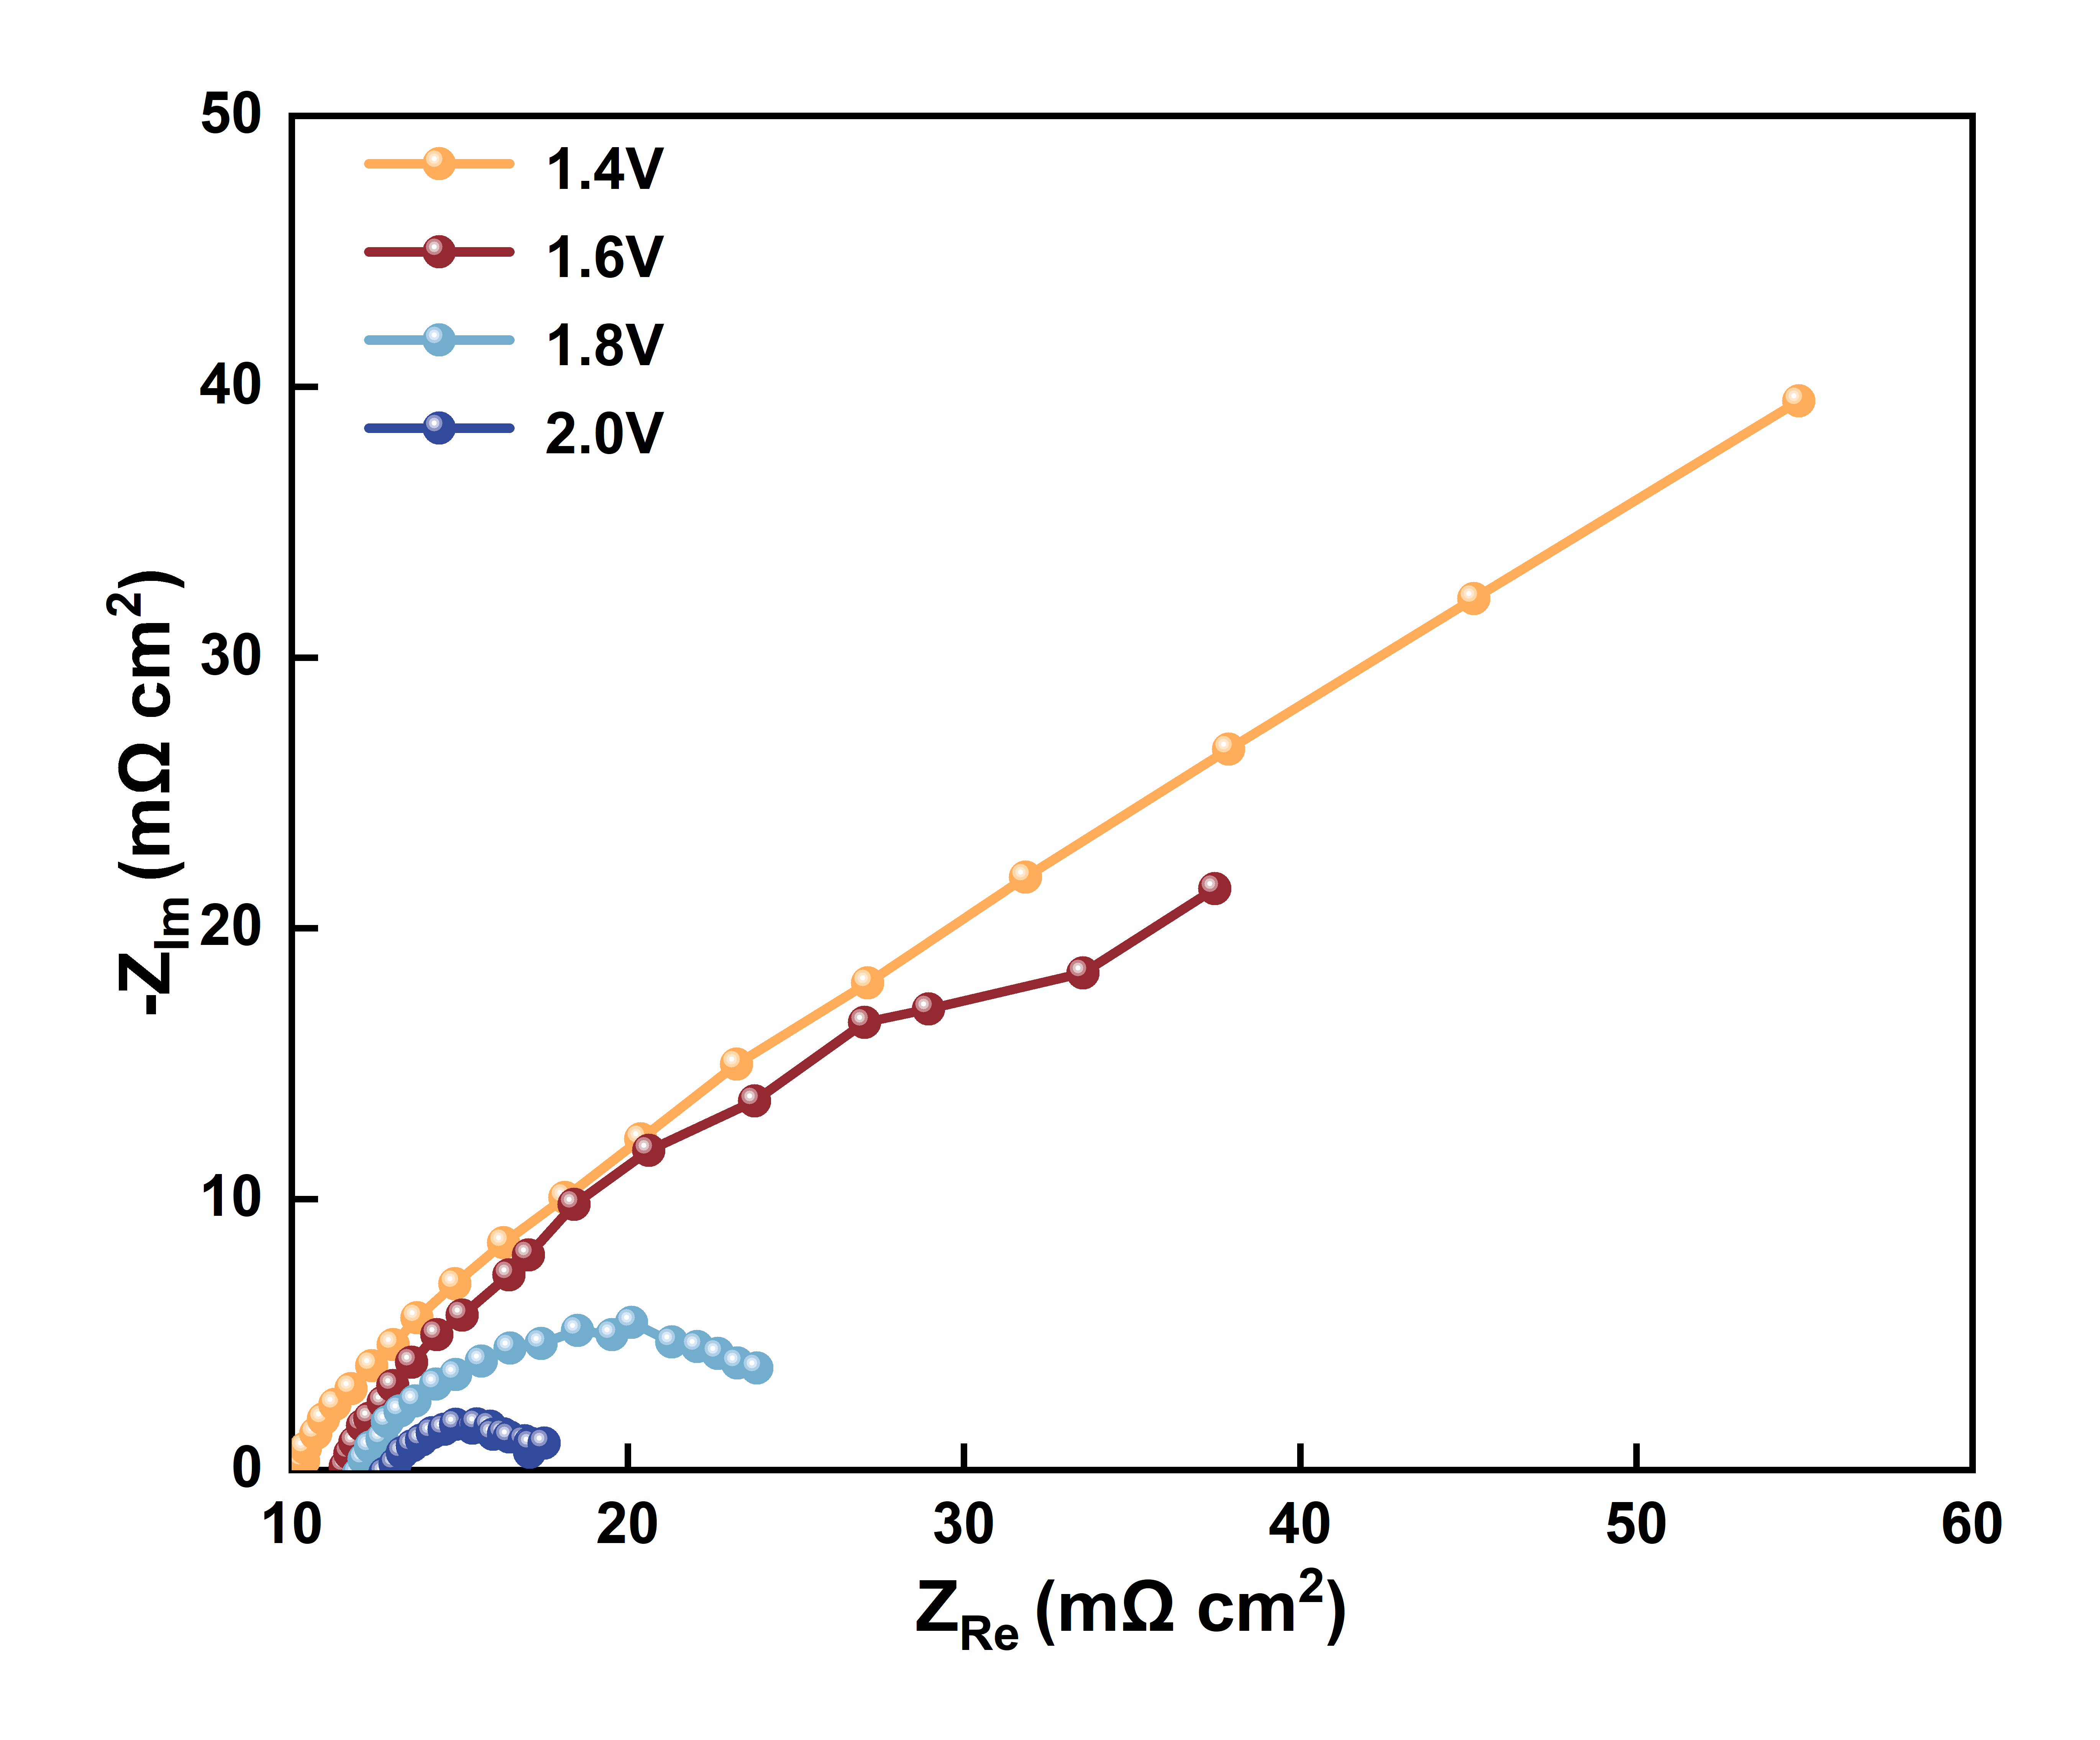


**Supplementary Fig. 30** EIS of QATYP-15 at 60℃.


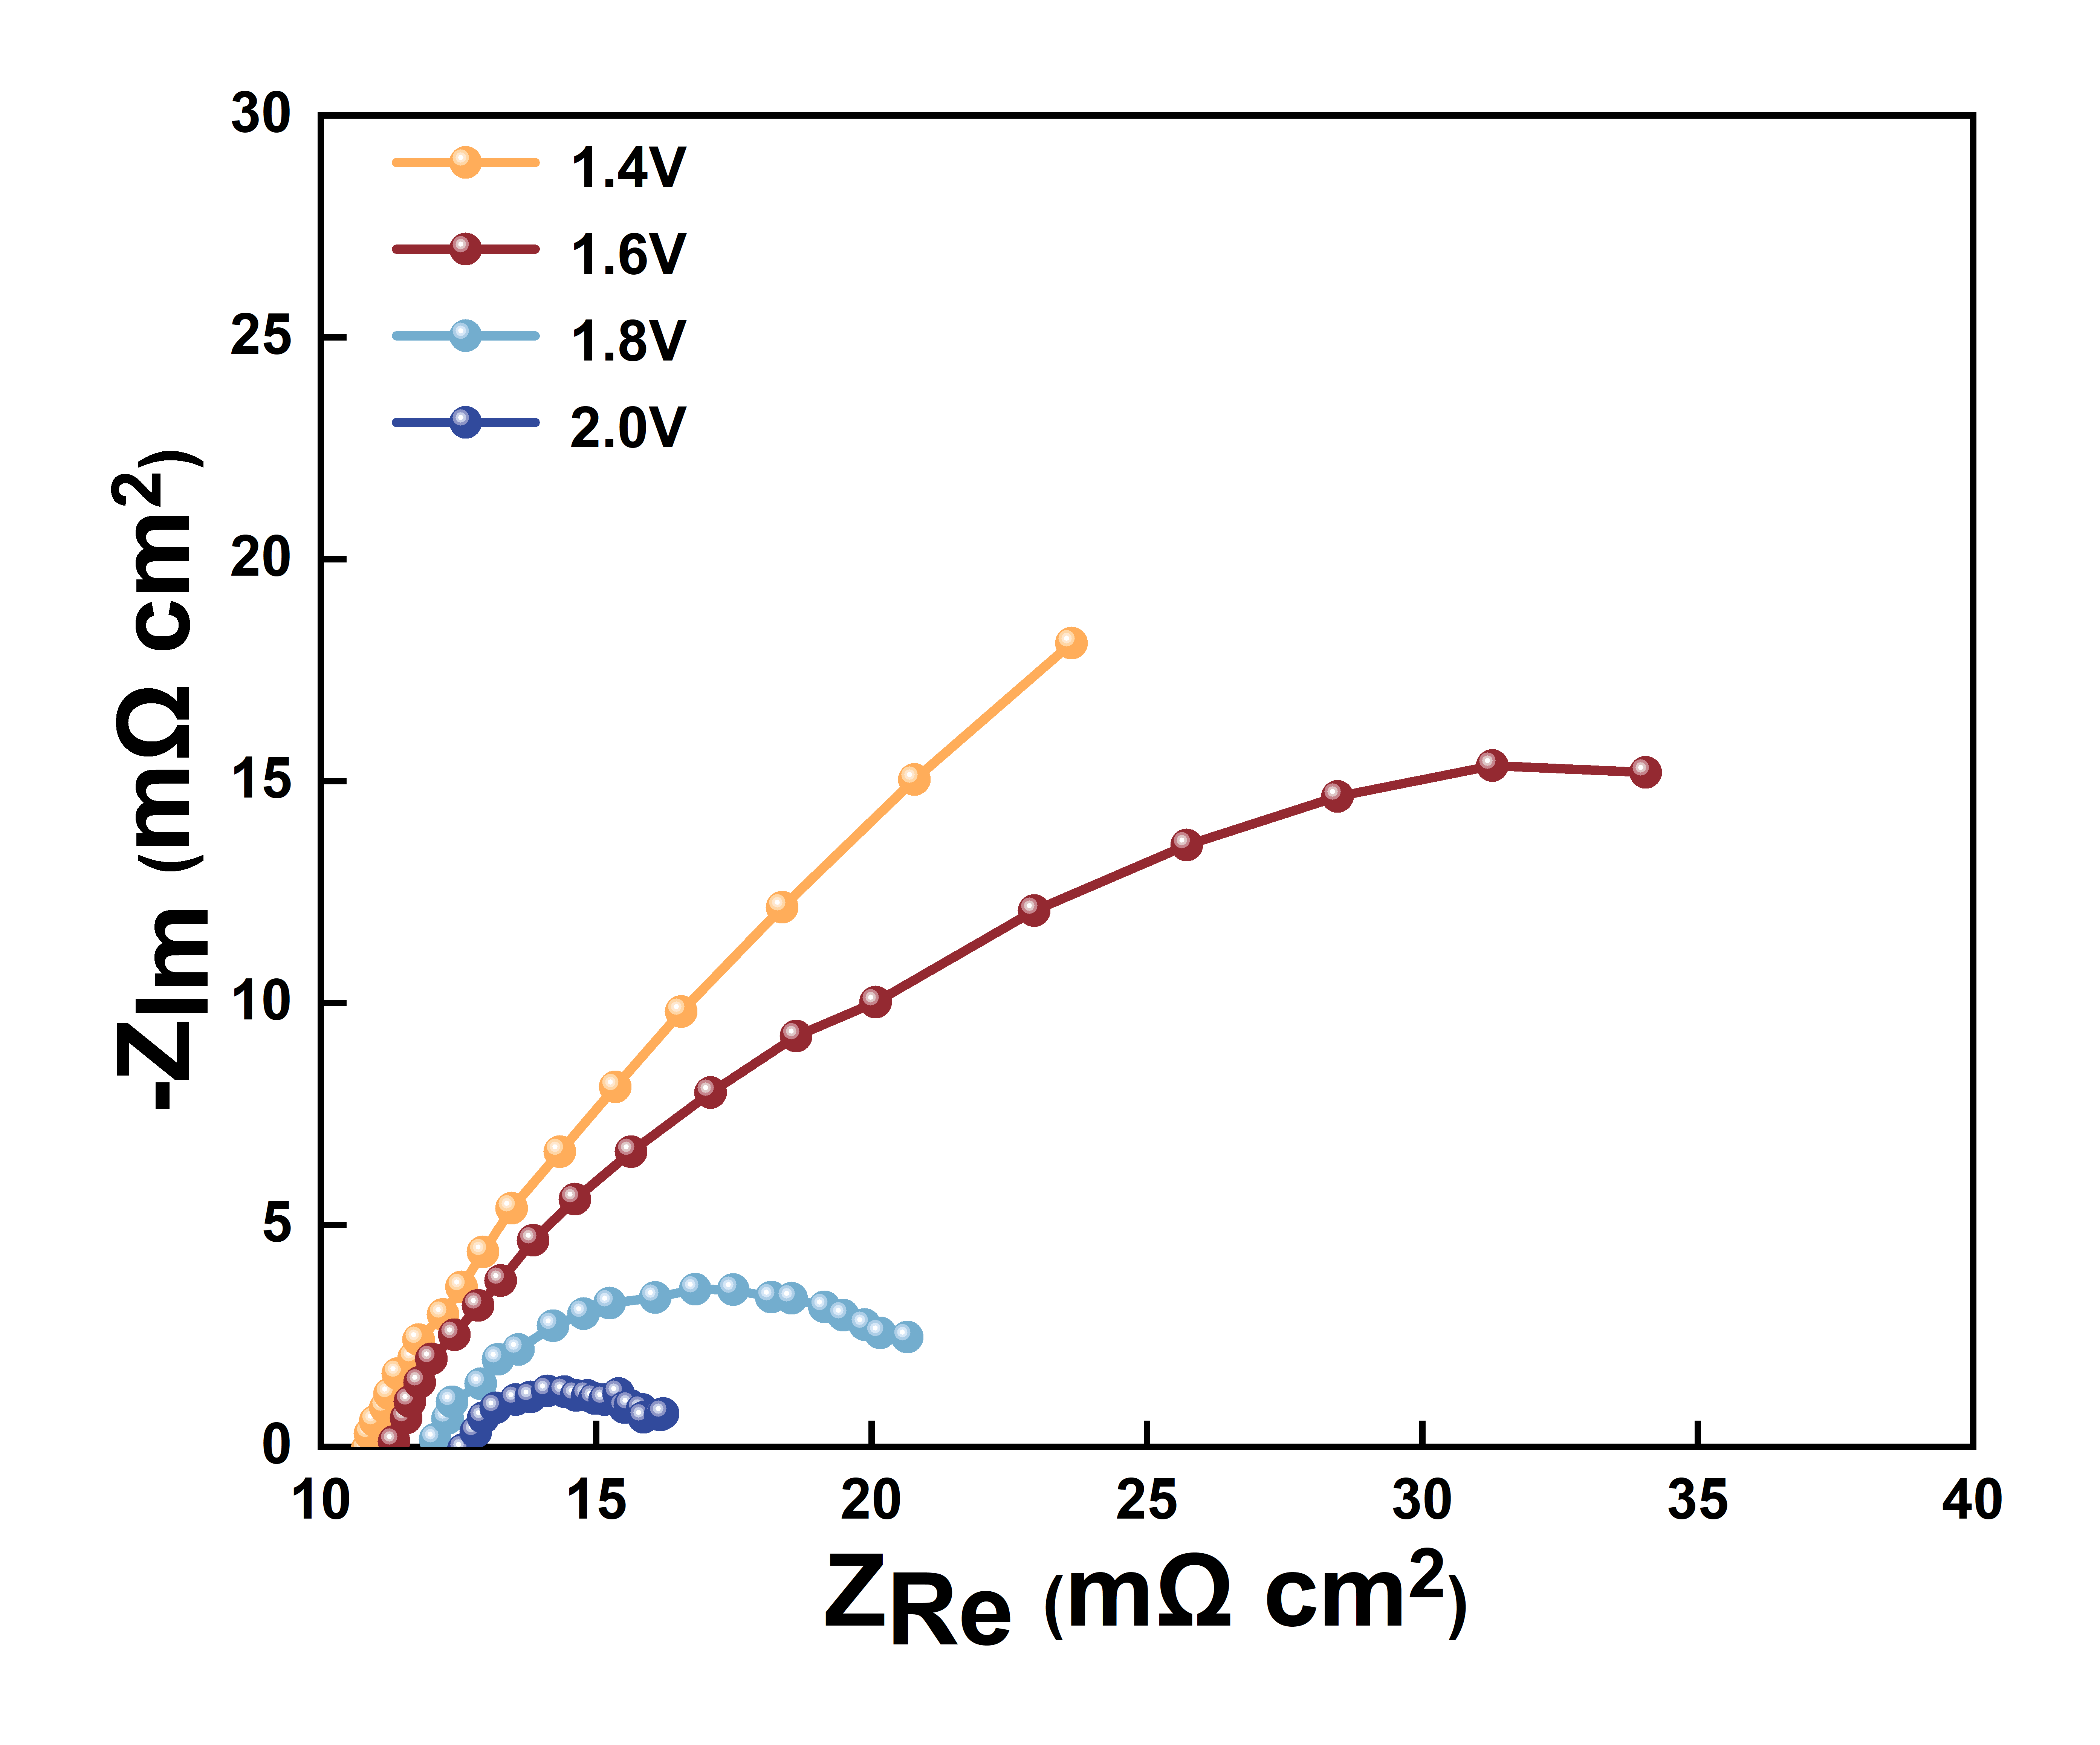


**Supplementary Fig. 31** EIS of QATYP-15 at 80℃.


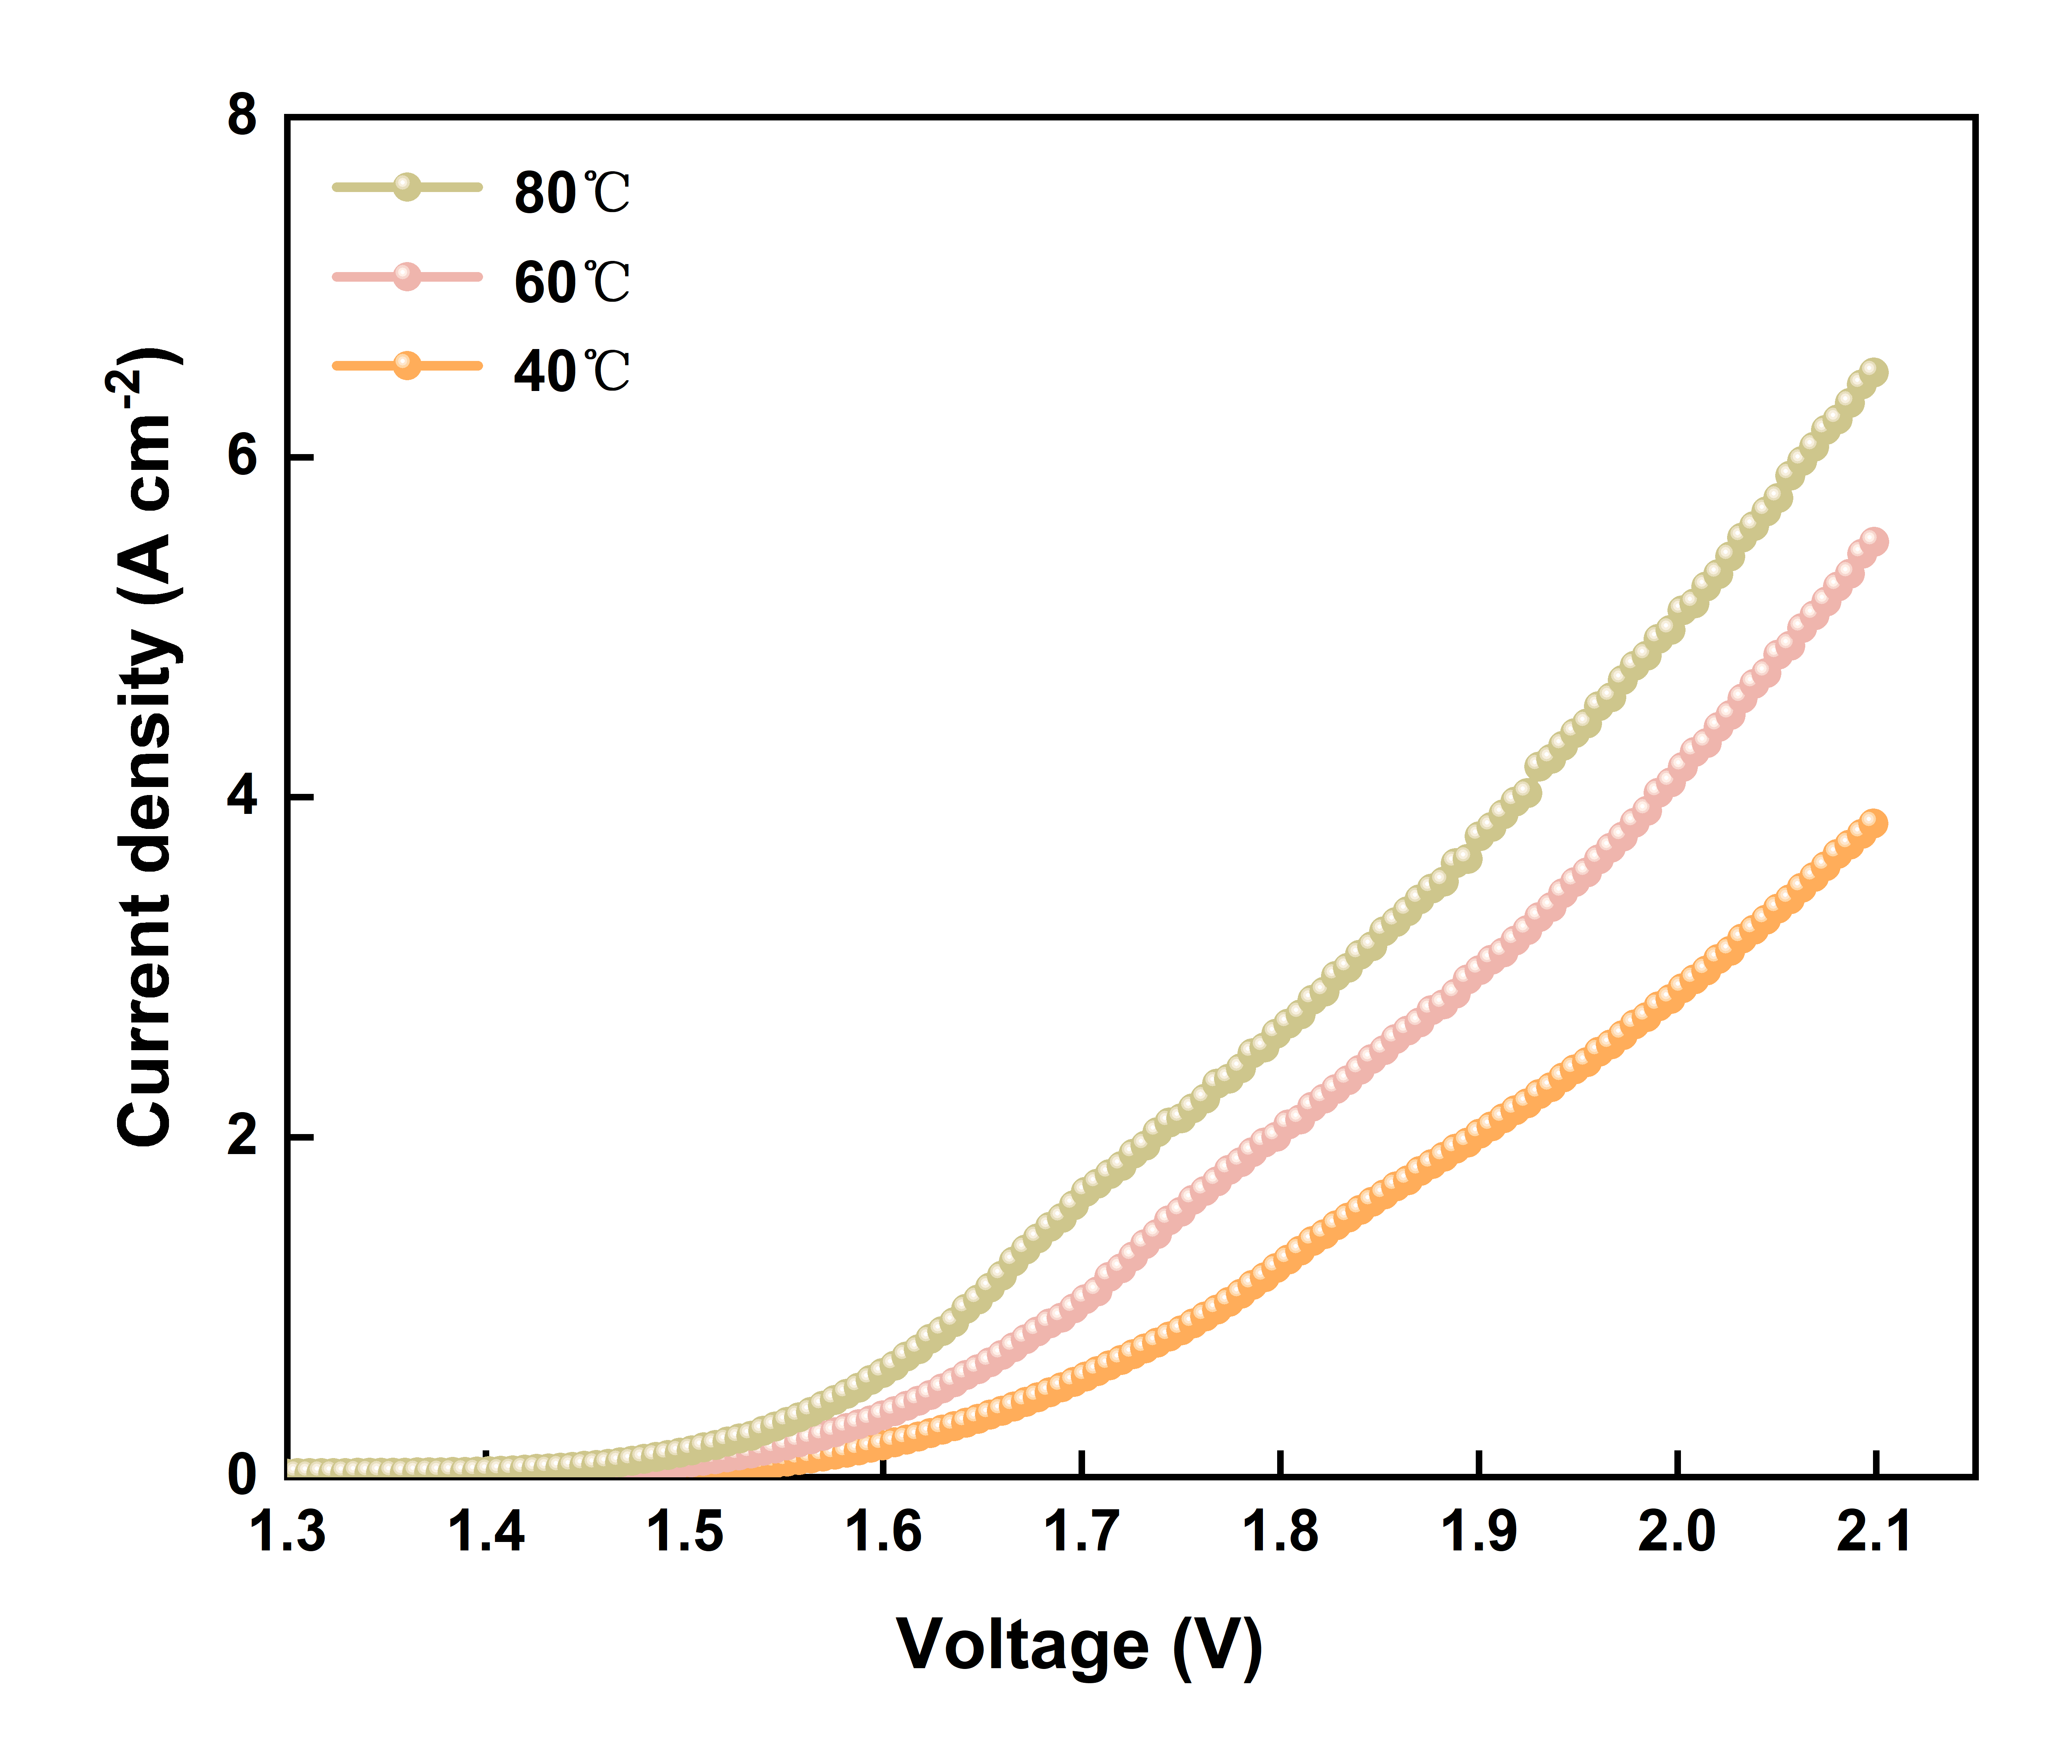


**Supplementary Fig. 32** I-V curves of QATYP-15 at 0.1M KOH.


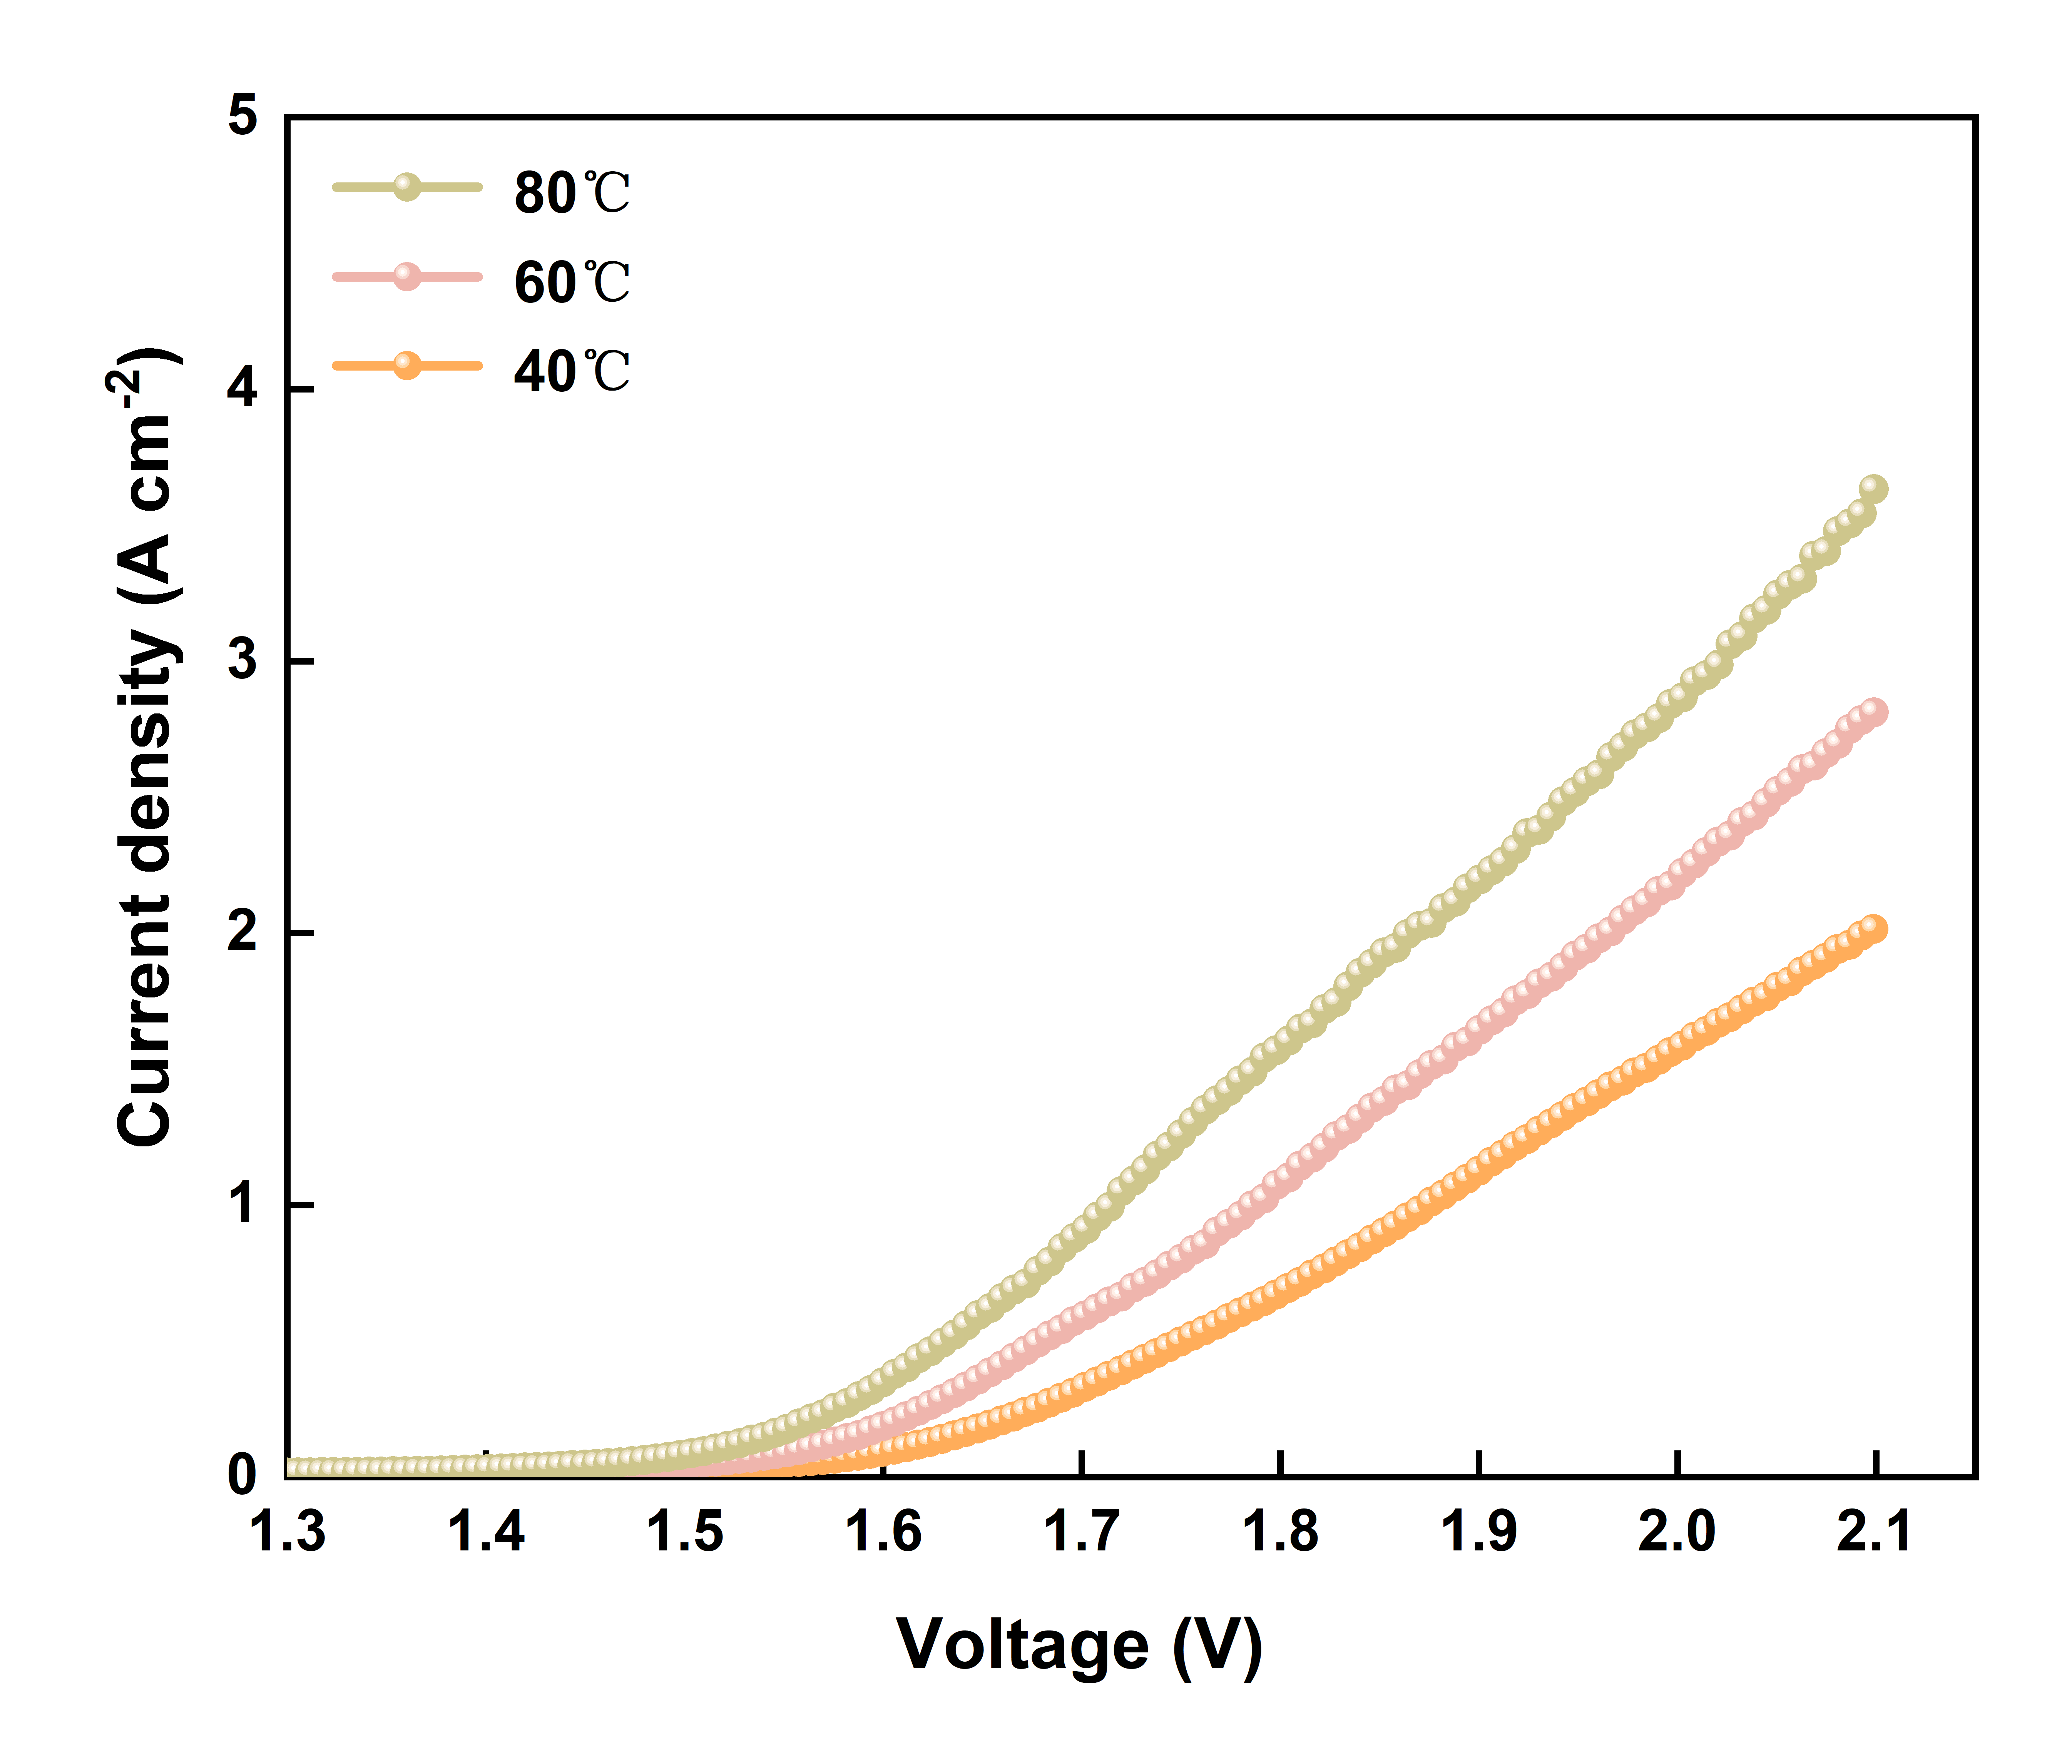


**Supplementary Fig. 33** I-V curves of QATYP-15 at 0.01M KOH.


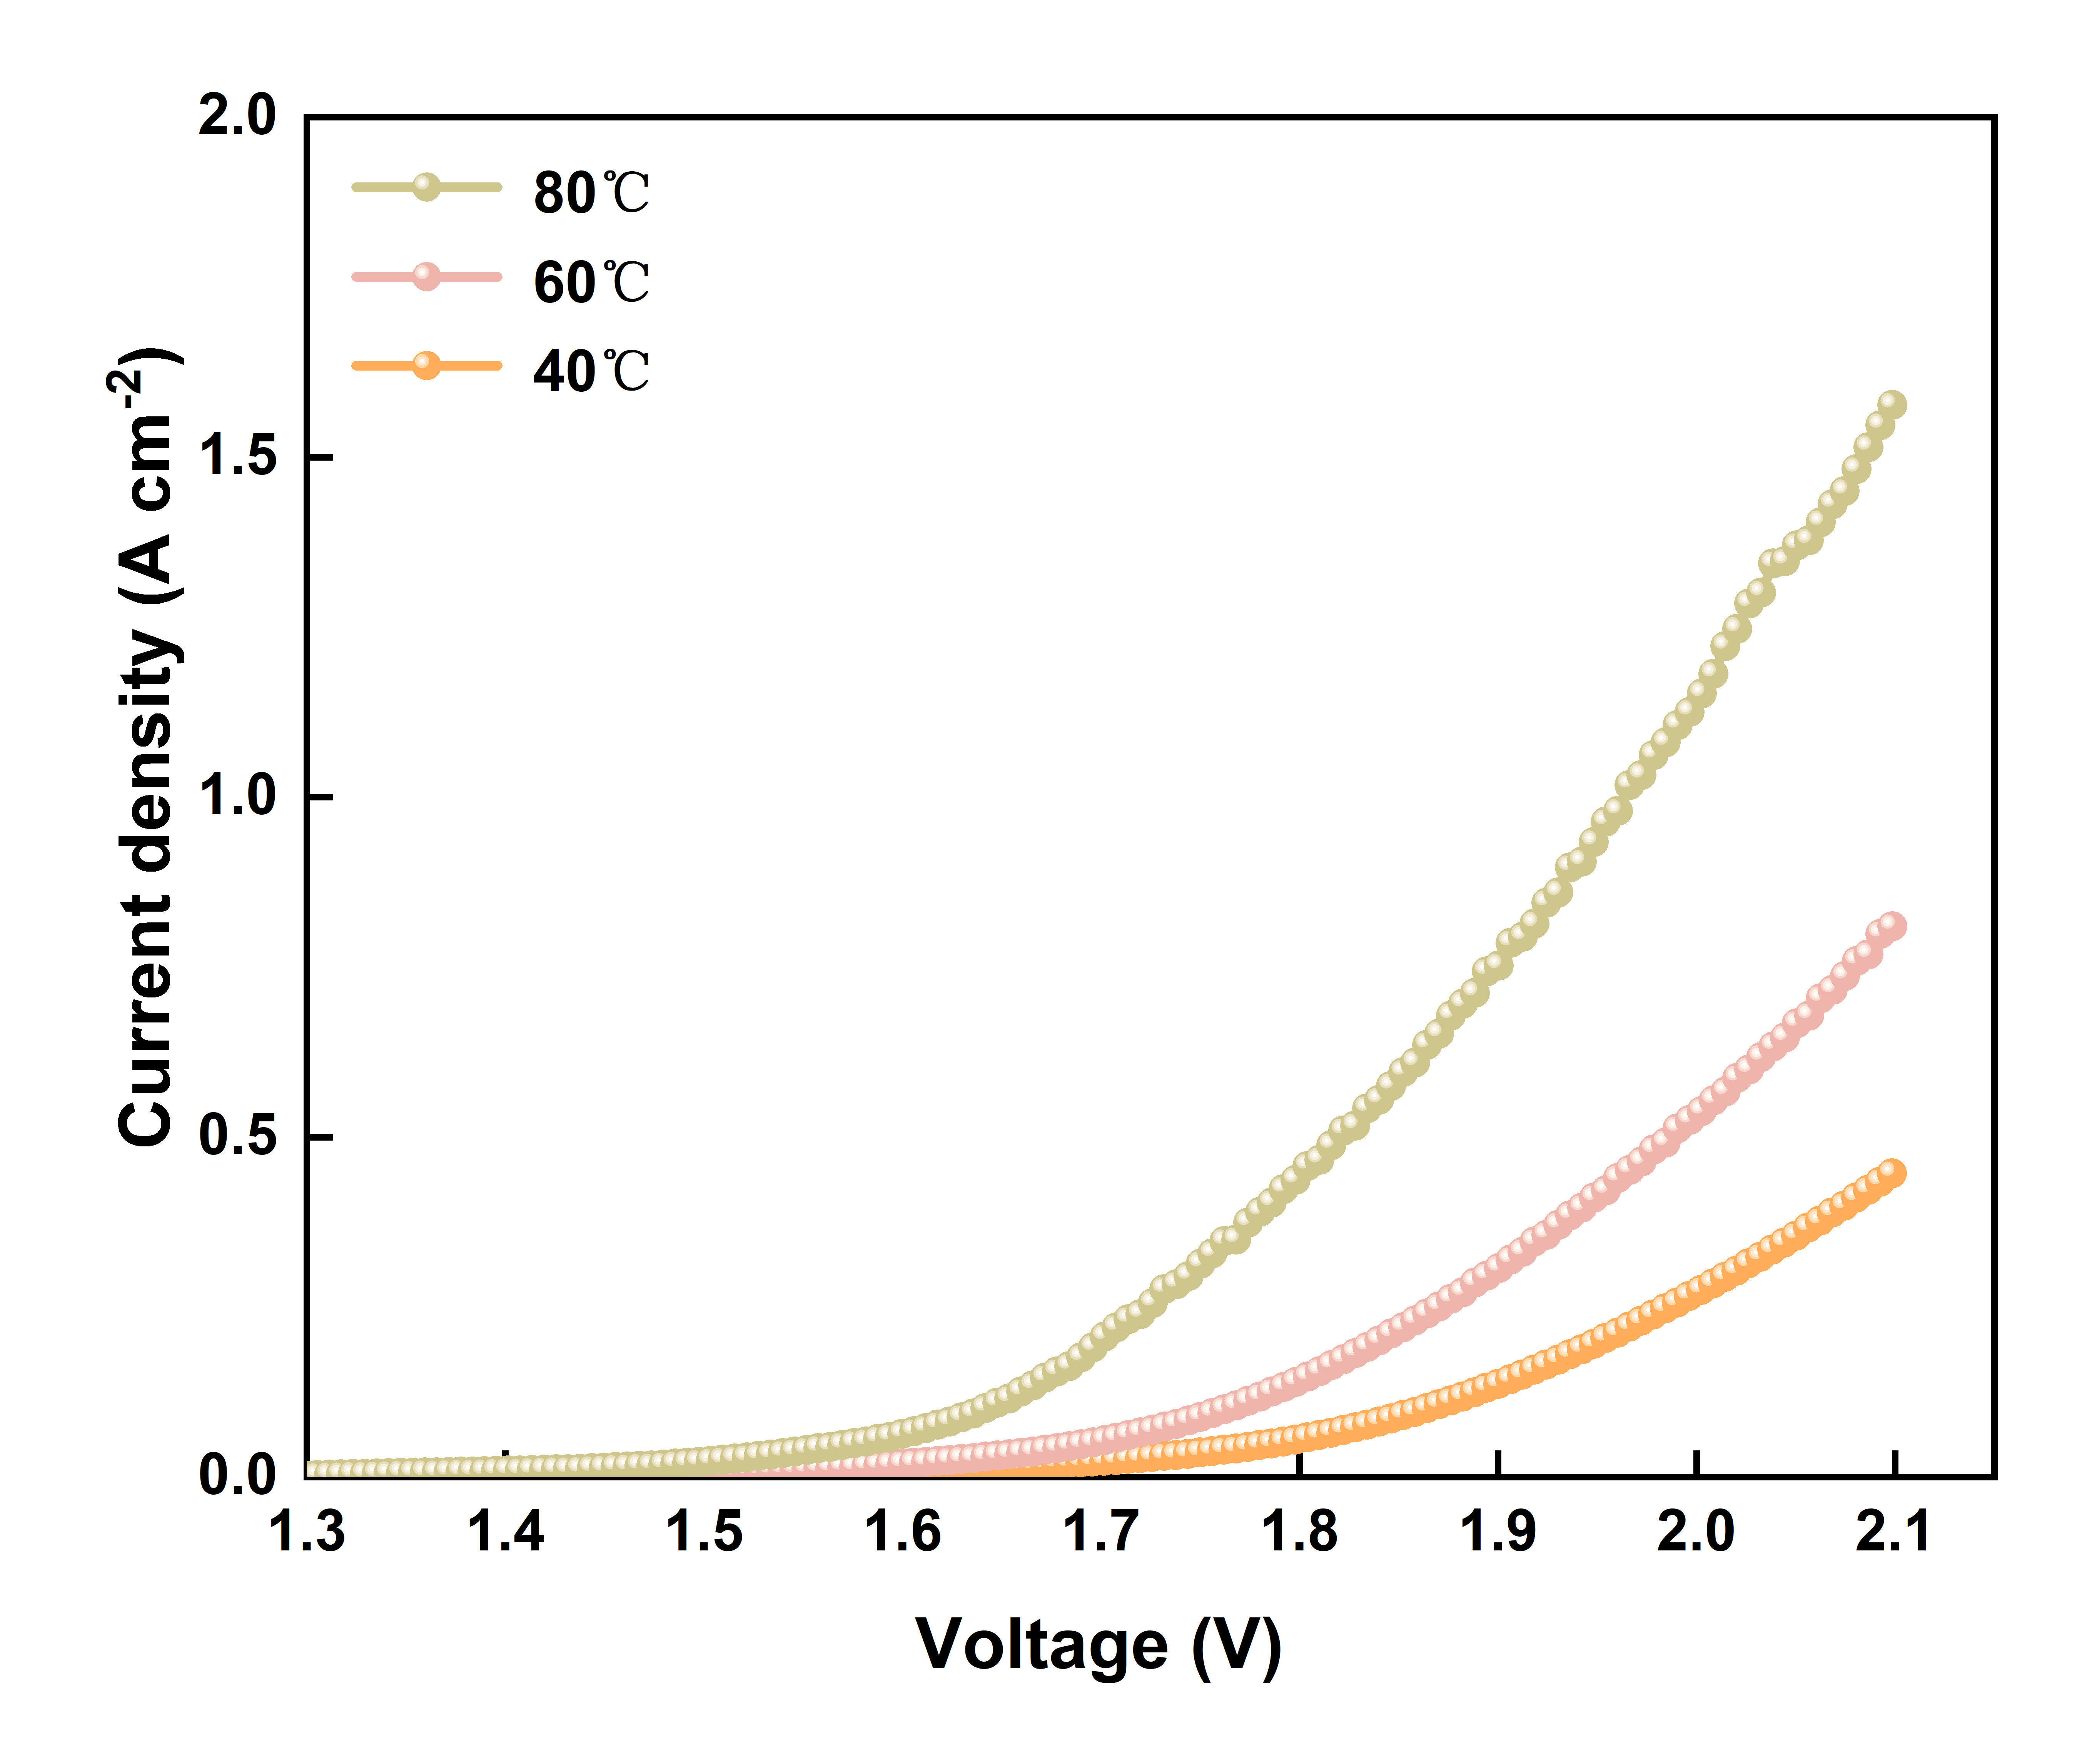


**Supplementary Fig. 34** I-V curves of QATYP-15 at pure water.


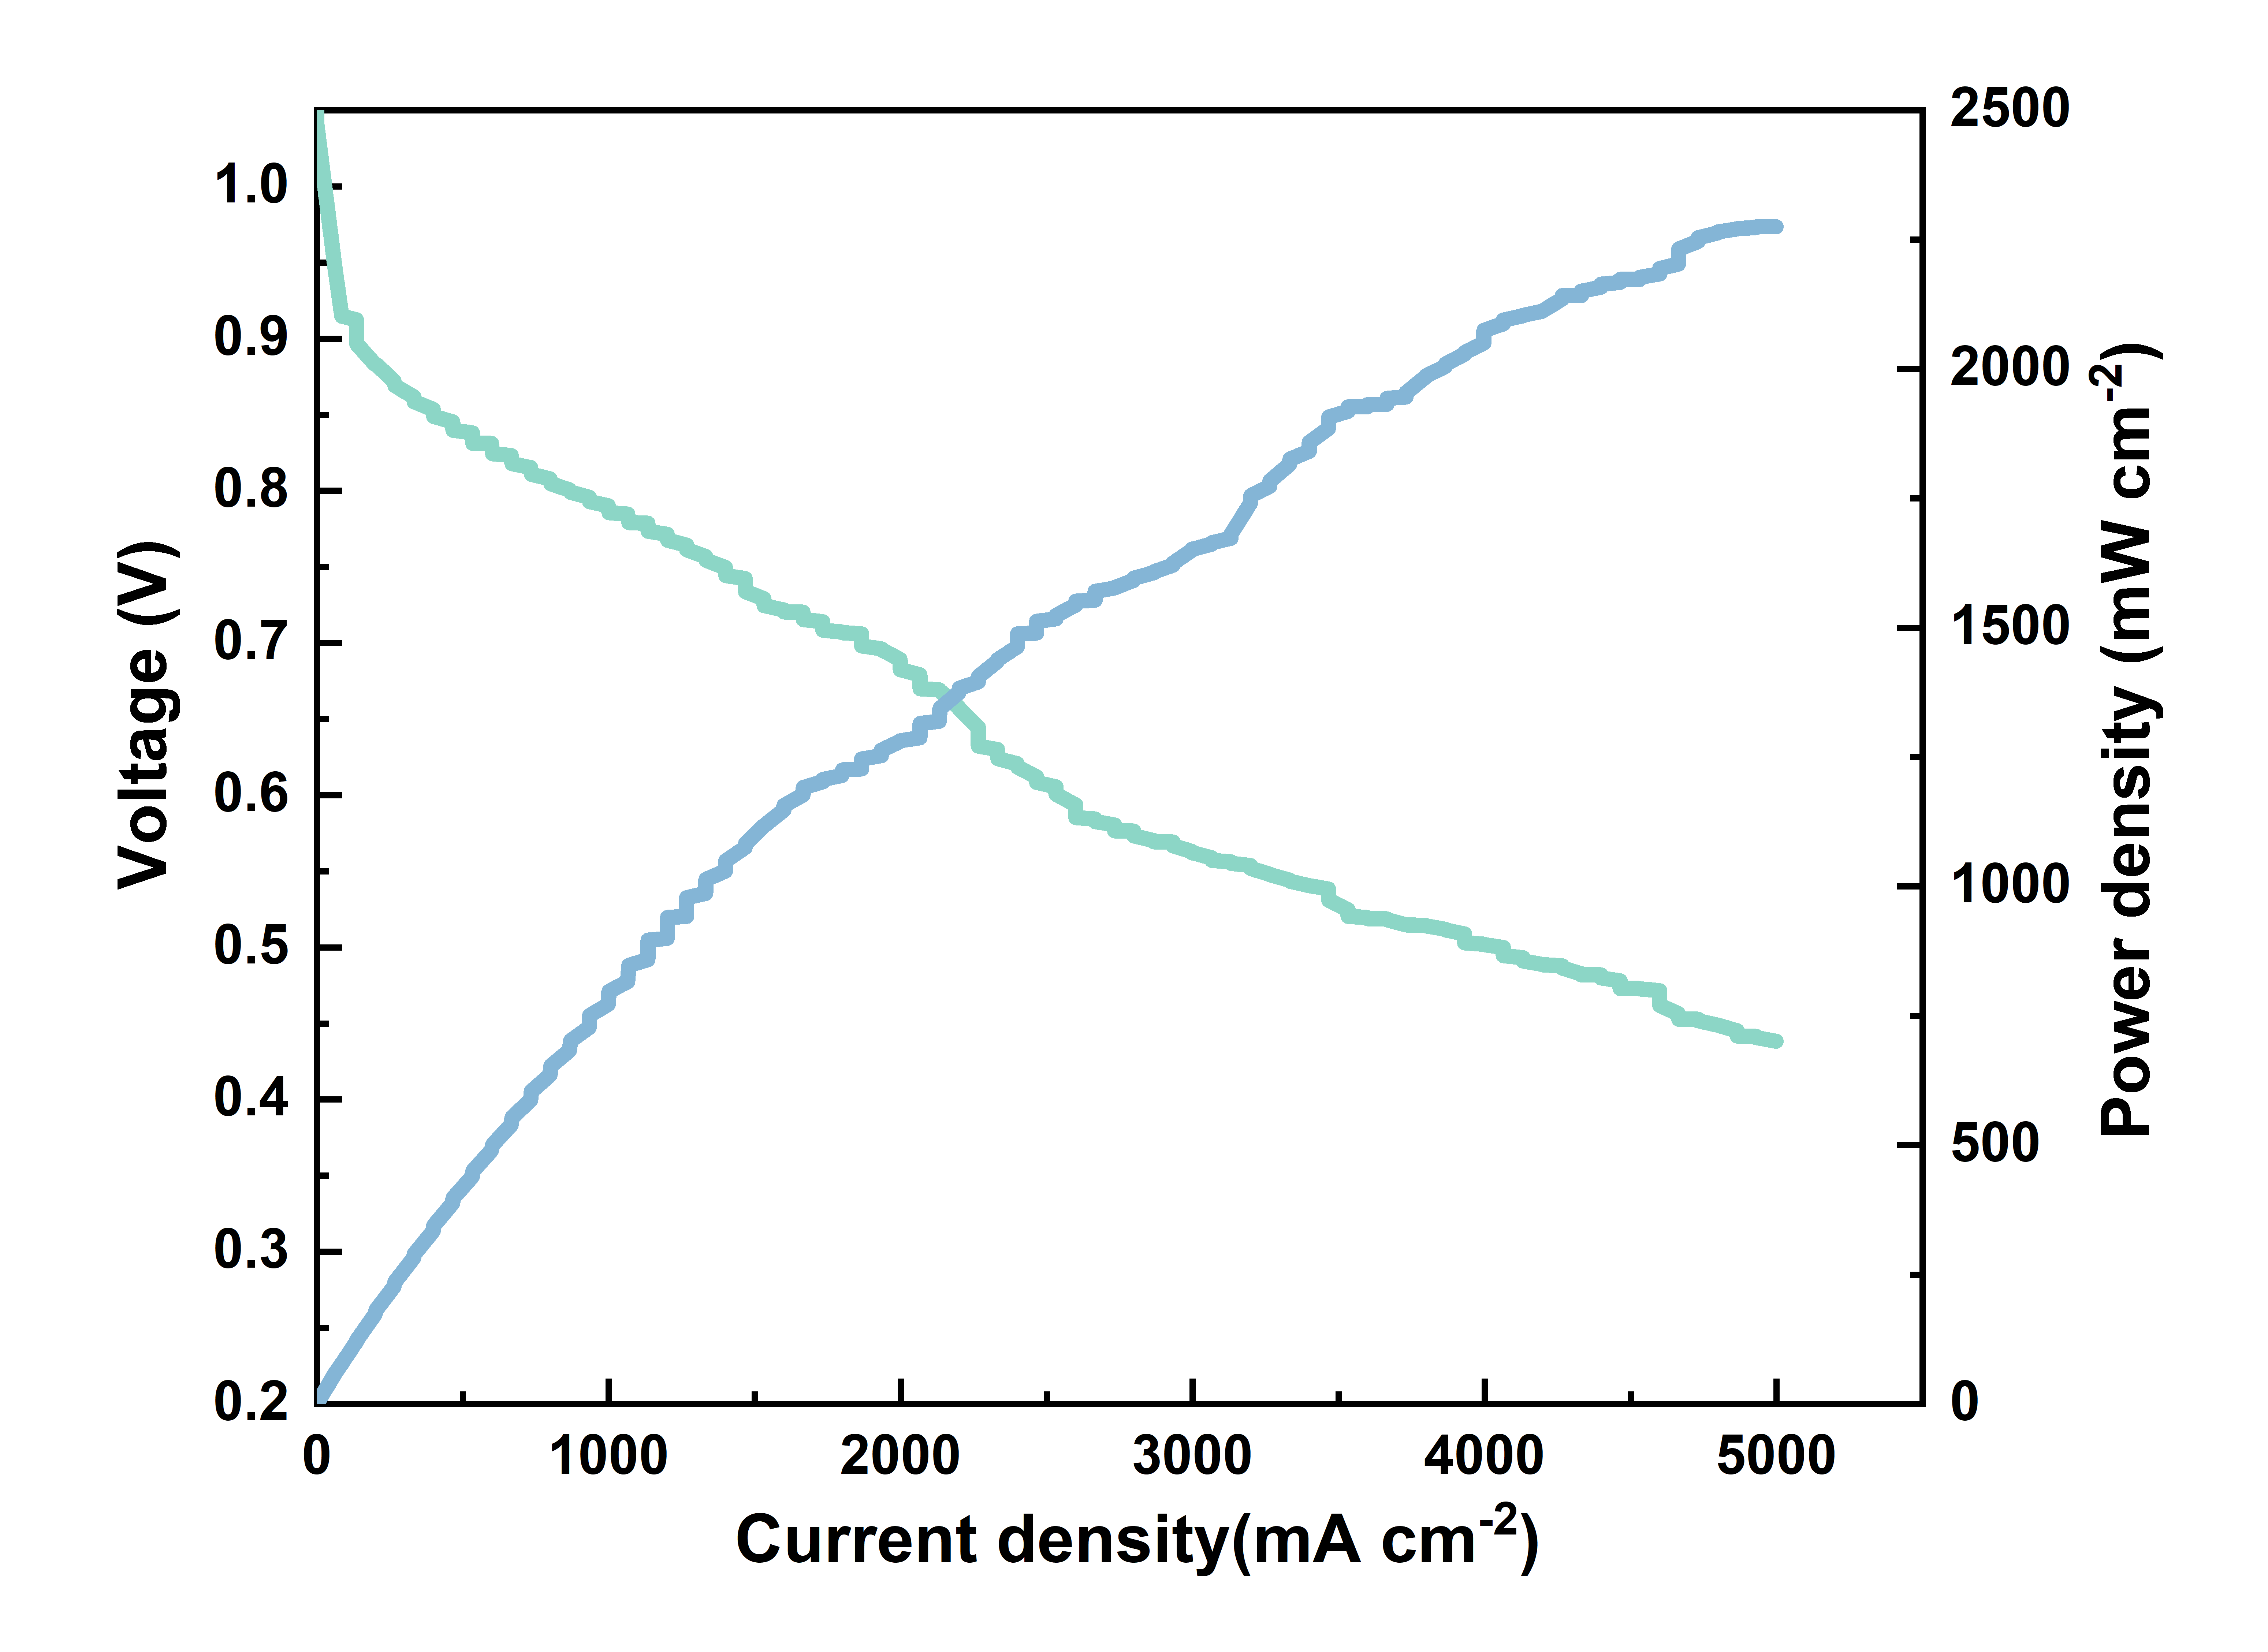


**Supplementary Fig. 35** AEMFC performance of QATYP-15 at 80 ℃ with 1.5 bar back pressure, A/C for 75%/100% RH.
